# Supplementary material for: Huangqi fuling decoction inhibits the invasion and metastasis of gastric cancer via the TNF signaling pathway
Source: Research Square preprint supplement (doi:10.21203/rs.3.rs-5906521/v1), 2025-04-28
Supplement: Supplementary file 1 [file 099355bd856a6e30469e0e06.xlsx]

## Sheet: HQ
MOLID	ingredients	MW	AlogP	Hdon	Hacc	OB（%）	Caco-2	BBB	DL	FASA	HL
MOL000398	isoflavanone	316.33	2.42	2	6	109.99	0.53	0.17	0.3	0	15.51
MOL000401	astragalosideI	869.17	0.41	7	16	46.79	-2.28	-3.58	0.11	0	13.14
MOL000403	astragalosideII	827.13	0.03	8	15	46.06	-2.05	-3.26	0.13	0	10.58
MOL000407	astragalosideⅣ	785.09	-0.35	9	14	22.5	-2.11	-3.41	0.15	0
MOL000413	astrachrysoside A	769.09	0.54	8	13	24.55	-1.93	-2.96	0.1	0
MOL000417	Calycosin	284.28	2.32	2	5	47.75	0.52	-0.43	0.24	0	17.1
MOL000422	kaempferol	286.25	1.77	4	6	41.88	0.26	-0.55	0.24	0	14.74
MOL000426	asernestioside A_qt	769.09	0.54	8	13	24.55	-1.95	-2.98	0.1	0
MOL000432	linolenic acid	278.48	5.95	1	2	45.01	1.21	0.84	0.15	0	5.54
MOL000433	FA	441.45	0.01	7	13	68.96	-1.5	-2.59	0.71	0	24.81
MOL000435	acetylastragaloside I_qt	749.05	2.54	3	12	30.75	-1.07	-2.1	0.17	0	12.94
MOL000436	(Z)-1-(2,4-dihydroxyphenyl)-3-(4-hydroxyphenyl)prop-2-en-1-one	256.27	2.9	3	4	87.51	0.2	-0.48	0.15	0	20.28
MOL000438	(3R)-3-(2-hydroxy-3,4-dimethoxyphenyl)chroman-7-ol	302.35	3.13	2	5	67.67	0.96	0.34	0.26	0	2.9
MOL000439	isomucronulatol-7,2'-di-O-glucosiole	626.67	-0.68	8	15	49.28	-2.22	-3.36	0.62	0	0.93
MOL000440	isomucronulatol-7,2'-di-O-glucosiole_qt	464.51	1.22	5	10	23.42	-0.66	-1.48	0.79	0
MOL000131	EIC	280.5	6.39	1	2	41.9	1.16	0.9	0.14	0.25	7.5
MOL000211	Mairin	456.78	6.52	2	3	55.38	0.73	0.22	0.78	0.26	8.87
MOL000239	Jaranol	314.31	2.09	2	6	50.83	0.61	-0.22	0.29	0.29	15.5
MOL000295	alexandrin	576.95	6.34	4	6	20.63	-0.2	-0.81	0.63	0
MOL000296	hederagenin	414.79	8.08	1	1	36.91	1.32	0.96	0.75	0	5.35
MOL000033	(3S,8S,9S,10R,13R,14S,17R)-10,13-dimethyl-17-[(2R,5S)-5-propan-2-yloctan-2-yl]-2,3,4,7,8,9,11,12,14,15,16,17-dodecahydro-1H-cyclopenta[a]phenanthren-3-ol	428.82	8.54	1	1	36.23	1.45	1.09	0.78	0	5.22
MOL000354	isorhamnetin	316.28	1.76	4	7	49.6	0.31	-0.54	0.31	0.32	14.34
MOL000371	3,9-di-O-methylnissolin	314.36	2.89	0	5	53.74	1.18	0.63	0.48	0	9
MOL000374	5'-hydroxyiso-muronulatol-2',5'-di-O-glucoside	642.67	-0.95	9	16	41.72	-2.47	-3.62	0.69	0	2.52
MOL000378	7-O-methylisomucronulatol	316.38	3.38	1	5	74.69	1.08	0.84	0.3	0	2.98
MOL000379	9,10-dimethoxypterocarpan-3-O-β-D-glucoside	462.49	0.74	4	10	36.74	-0.63	-1.5	0.92	0	13.06
MOL000380	(6aR,11aR)-9,10-dimethoxy-6a,11a-dihydro-6H-benzofurano[3,2-c]chromen-3-ol	300.33	2.64	1	5	64.26	0.93	0.55	0.42	0	8.49
MOL000381	13-hydroxy-9,11-octadecadienoic acid	296.5	5.29	2	3	35.6	0.44	-0.38	0.17	0	4.63
MOL000387	Bifendate	418.38	2.56	0	10	31.1	0.15	-0.06	0.67	0	17.96
MOL000392	formononetin	268.28	2.58	1	4	69.67	0.78	0.02	0.21	0	17.04
MOL000442	1,7-Dihydroxy-3,9-dimethoxy pterocarpene	314.31	3.11	2	6	39.05	0.89	-0.04	0.48	0	7.95
MOL000098	quercetin	302.25	1.5	5	7	46.43	0.05	-0.77	0.28	0.38	14.4

## Sheet: CX
MOLID	ingredients	MW	AlogP	Hdon	Hacc	OB（%）	Caco-2	BBB	DL	FASA	HL
MOL000131	EIC	280.5	6.39	1	2	41.9	1.16	0.9	0.14	0.25	7.5
MOL001390	49070_FLUKA	222.41	3.2	1	1	85.51	1.29	1.46	0.12	0.24	12.06
MOL001494	Mandenol	308.56	6.99	0	2	42	1.46	1.14	0.19	0.25	5.39
MOL001641	METHYL LINOLEATE	294.53	6.64	0	2	41.93	1.44	1.08	0.17	0.21	6.05
MOL000208	()-Aromadendrene	204.39	4.22	0	0	55.74	1.81	2.06	0.1	0.26	11.84
MOL002096	(+)-ALPHA-FUNEBRENE	204.39	4.12	0	0	52.87	1.79	2.08	0.1	0.23	4.89
MOL002104	Senkyunolide-Q	278.38	2.69	1	4	26.84	0.42	0.23	0.16	0.29
MOL002114	augustic-acid	472.78	5.46	3	4	21.08	0.18	-0.38	0.74	0.27
MOL002120	betea-CUBEBENE	204.39	4.22	0	0	32.16	1.82	2.13	0.11	0.26	6.68
MOL002135	Myricanone	356.45	4.1	2	5	40.6	0.67	-0.08	0.51	0.24	4.39
MOL002140	Perlolyrine	264.3	3.2	2	3	65.95	0.88	0.15	0.27	0.21	12.62
MOL002149	senkyunolide-S	240.33	0.44	3	4	20.61	-0.46	-0.7	0.11	0.26
MOL002150	1-Acetyl-beta-carboline	210.25	2.34	1	2	67.12	1.18	0.81	0.13	0.29	23.47
MOL002151	senkyunone	326.52	6.32	0	2	47.66	1.15	0.5	0.24	0.34	2.42
MOL002153	1H-Cycloprop(e)azulen-7-ol, decahydro-1,1,7-trimethyl-4-methylene-, (1aR-(1aalpha,4aalpha,7beta,7abeta,7balpha))-	220.39	3.01	1	1	82.33	1.37	1.49	0.12	0.28	12.04
MOL002157	wallichilide	412.57	4.82	0	5	42.31	0.82	0.73	0.71	0.24	6.85
MOL002158	xiongterpene	574.87	8.12	2	5	23.77	0.44	-0.2	0.42	0.29
MOL002161	1-beta-ethylacrylate-7-aldehyde-beta-carboline	294.33	3.03	1	4	28.53	0.45	-0.6	0.31	0.29
MOL002182	(-)-spathulenol	220.39	3.01	1	1	25.82	1.45	1.65	0.12	0.25
MOL002186	Aromadendrene oxide 2	220.39	3.08	0	1	65.1	1.56	1.82	0.14	0.2	1.94
MOL002190	Cedrene	204.39	4.18	0	0	51.14	1.82	2.12	0.11	0.24	5.04
MOL002203	Exceparl M-OL	296.55	7.09	0	2	31.9	1.39	1.08	0.16	0.17	5.43
MOL002204	506-43-4	266.52	6.47	1	1	37.76	1.41	1.02	0.12	0.2	6.14
MOL000357	Sitogluside	576.95	6.34	4	6	20.63	-0.14	-0.93	0.62	0.23
MOL000359	sitosterol	414.79	8.08	1	1	36.91	1.32	0.87	0.75	0.22	5.37
MOL000433	FA	441.45	0.01	7	13	68.96	-1.5	-2.59	0.71	0	24.81
MOL000675	oleic acid	282.52	6.84	1	2	33.13	1.17	0.78	0.14	0.2	4.99
MOL000937	58870_FLUKA	204.39	4.36	0	0	49.01	1.82	2.08	0.1	0.22	12.47

## Sheet: FL
MOLID	ingredients	MW	AlogP	Hdon	Hacc	OB（%）	Caco-2	BBB	DL	FASA	HL
MOL000273	(2R)-2-[(3S,5R,10S,13R,14R,16R,17R)-3,16-dihydroxy-4,4,10,13,14-pentamethyl-2,3,5,6,12,15,16,17-octahydro-1H-cyclopenta[a]phenanthren-17-yl]-6-methylhept-5-enoic acid	470.76	5.41	3	4	30.93	0.01	-0.76	0.81	0	6.81
MOL000274	3β-hydroxylanosta-7,9(11),24-trien-21-oic acid	454.76	6.58	2	3	24.92	0.53	-0.24	0.8	0
MOL000275	trametenolic acid	456.78	7.03	2	3	38.71	0.52	-0.14	0.8	0	7.78
MOL000276	7,9(11)-dehydropachymic acid	526.83	6.1	2	5	35.11	0.03	-0.87	0.81	0	7.34
MOL000279	Cerevisterol	430.74	5.15	3	3	37.96	0.28	-0.39	0.77	0	5.31
MOL000280	(2R)-2-[(3S,5R,10S,13R,14R,16R,17R)-3,16-dihydroxy-4,4,10,13,14-pentamethyl-2,3,5,6,12,15,16,17-octahydro-1H-cyclopenta[a]phenanthren-17-yl]-5-isopropyl-hex-5-enoic acid	484.79	5.72	3	4	31.07	0.05	-0.7	0.82	0	7.42
MOL000282	ergosta-7,22E-dien-3beta-ol	398.74	7.18	1	1	43.51	1.32	0.91	0.72	0	5.11
MOL000283	Ergosterol peroxide	430.74	7.17	1	3	40.36	0.84	0.34	0.81	0	3.43
MOL000284	L-uridine	244.23	-2.45	4	8	23.4	-1.07	-1.42	0.11	0
MOL000285	(2R)-2-[(5R,10S,13R,14R,16R,17R)-16-hydroxy-3-keto-4,4,10,13,14-pentamethyl-1,2,5,6,12,15,16,17-octahydrocyclopenta[a]phenanthren-17-yl]-5-isopropyl-hex-5-enoic acid	482.77	5.68	2	4	38.26	0.12	-0.57	0.82	0	6.77
MOL000287	3beta-Hydroxy-24-methylene-8-lanostene-21-oic acid	470.81	7.33	2	3	38.7	0.61	-0.04	0.81	0	6.59
MOL000289	pachymic acid	528.85	6.54	2	5	33.63	0.1	-0.57	0.81	0	9.27
MOL000290	Poricoic acid A	498.77	5.94	3	5	30.61	-0.14	-0.93	0.76	0	8.26
MOL000291	Poricoic acid B	484.74	5.64	3	5	30.52	-0.08	-0.87	0.75	0	8.67
MOL000292	poricoic acid C	482.77	7.11	2	4	38.15	0.32	-0.41	0.75	0	7.73
MOL000293	poricoic acid D	514.77	4.73	4	6	22.38	-0.62	-1.29	0.78	0
MOL000294	poricoic acid DM	528.8	4.98	3	6	29.32	-0.34	-0.94	0.78	0
MOL000295	alexandrin	576.95	6.34	4	6	20.63	-0.2	-0.81	0.63	0
MOL000296	hederagenin	414.79	8.08	1	1	36.91	1.32	0.96	0.75	0	5.35
MOL000297	Tumulosic acid	486.81	6.16	3	4	29.88	0.13	-0.47	0.81	0
MOL000300	dehydroeburicoic acid	453.75	6.35	1	3	44.17	0.38	-0.16	0.83	0.04	7.04

## Sheet: SJ
MOLID	ingredients	MW	AlogP	Hdon	Hacc	OB（%）	Caco-2	BBB	DL	FASA	HL
MOL001566	calarene	204.39	4.12	0	0	52.16	1.82	2.04	0.11	0.23	-1.34
MOL002467	6-gingerol	294.43	3.47	2	4	35.64	0.54	-0.08	0.16	0.23	3.05
MOL002495	6-shogaol	276.41	4.55	1	3	31	1.07	0.49	0.14	0.25	4.07
MOL000358	beta-sitosterol	414.79	8.08	1	1	36.91	1.32	0.99	0.75	0.23	5.36
MOL006127	6-Dehydrogingerdione	290.39	3.55	2	4	23.73	0.9	0.34	0.16	0.25
MOL006128	gingerglycolipid)A	676.89	1.65	8	14	25.31	-2.03	-2.85	0.4	0.26
MOL006129	6-methylgingediacetate2	394.56	4.55	0	6	48.73	0.55	-0.16	0.32	0.25	5.44
MOL006133	(E)-1-(4-hydroxy-3-methoxyphenyl)dodec-4-en-3-one	304.47	5.47	1	3	23.77	1.1	0.5	0.19	0.25
MOL000066	alloaromadedrene	204.39	4.22	0	0	53.46	1.83	2.1	0.1	0	12.51
MOL000025	α-Longipinene	204.39	4.12	0	0	53.26	1.83	2.14	0.12	0	12.06
MOL000131	EIC	280.5	6.39	1	2	41.9	1.16	0.9	0.14	0.25	7.5
MOL000208	()-Aromadendrene	204.39	4.22	0	0	55.74	1.81	2.06	0.1	0.26	11.84
MOL000266	beta-Cubebene	204.39	4.22	0	0	32.81	1.83	2.02	0.11	0.25	6.59
MOL000432	linolenic acid	278.48	5.95	1	2	45.01	1.21	0.84	0.15	0	5.54
MOL000449	Stigmasterol	412.77	7.64	1	1	43.83	1.44	1	0.76	0.22	5.57
MOL000474	(-)-Epoxycaryophyllene	220.39	3.52	0	1	35.94	1.57	1.83	0.13	0	6.09
MOL000612	(-)-alpha-cedrene	204.39	4.12	0	0	55.56	1.81	2.16	0.1	0.24	4.82
MOL000674	Farnesol acetate	264.45	5.14	0	2	21.97	1.44	1.21	0.11	0.27
MOL000676	DBP	278.38	4.2	0	4	64.54	0.8	0.56	0.13	0.34	5.41
MOL000935	Hepanal	204.39	4.36	0	0	53.83	1.86	2.17	0.1	0.24	11.92
MOL000938	calarene	204.39	4.12	0	0	51.55	1.82	2.05	0.11	0.23	-1.19
MOL001179	(&#8722;)-Alloaromadendrene	204.39	4.22	0	0	54.04	1.81	2.07	0.1	0.23	12.06
MOL001390	49070_FLUKA	222.41	3.2	1	1	85.51	1.29	1.46	0.12	0.24	12.06
MOL001771	poriferast-5-en-3beta-ol	414.79	8.08	1	1	36.91	1.45	1.14	0.75	0	5.07
MOL001945	Majudin	216.2	2.19	0	4	42.21	0.94	0.69	0.13	0.21	-3.6
MOL002153	1H-Cycloprop(e)azulen-7-ol, decahydro-1,1,7-trimethyl-4-methylene-, (1aR-(1aalpha,4aalpha,7beta,7abeta,7balpha))-	220.39	3.01	1	1	82.33	1.37	1.49	0.12	0.28	12.04
MOL002186	Aromadendrene oxide 2	220.39	3.08	0	1	65.1	1.56	1.82	0.14	0.2	1.94
MOL002335	beta-Gurjunene	204.39	4.22	0	0	51.36	1.81	2.07	0.1	0.26	12.07
MOL002573	β-patchoulene	204.39	4.32	0	0	50.69	1.79	2.16	0.11	0.22	14.26
MOL003358	Euxanthone	228.21	2.43	2	4	92.98	0.68	0.15	0.16	0	15.53
MOL003480	Diepicedrene-1-oxide	220.39	3.14	0	1	102.2	1.54	1.83	0.15	0.23	5.07
MOL003545	aristolene	204.39	4.12	0	0	52.2	1.81	2.08	0.11	0	-1.3
MOL003575	α-Panasinsene	204.39	4.08	0	0	56.77	1.83	2.11	0.12	0	0.57
MOL003978	(3R,6E,10E)-3,7,11,15-tetramethylhexadeca-1,6,10,14-tetraen-3-ol	290.54	6.39	1	1	45.45	1.53	1.32	0.14	0.29	4.37
MOL005743	Proximadiol	240.43	2.7	2	2	36.71	0.68	0.4	0.11	0	8.04
MOL005964	β-panasinsene	204.39	4.13	0	0	56.28	1.77	2.06	0.12	0.25	0.61
MOL008698	Dihydrocapsaicin	307.48	4.33	2	4	47.07	0.98	0.47	0.19	0.22	2.98
MOL010380	()-alpha-Funebrene	204.39	4.12	0	0	49.41	1.81	2.13	0.1	0.24	5.06
MOL010822	ZINC04026824	220.39	3.08	1	1	68.97	1.23	1.39	0.12	0.24	4.96

## Sheet: DZ
MOLID	ingredients	MW	AlogP	Hdon	Hacc	OB（%）	Caco-2	BBB	DL	FASA	HL
MOL011039	Vaccenic acid	282.52	6.84	1	2	33.13	1.17	0.95	0.14	0.23	5.44
MOL012921	stepharine	297.38	1.82	1	4	31.55	0.64	0.17	0.33	0.23	10.31
MOL012939	Scutianine C	534.77	4.32	3	8	27.32	0.62	0.32	0.79	0.35
MOL012940	Spiradine A	311.46	1.24	1	3	113.52	0.29	0.14	0.61	0.27	15.71
MOL012946	zizyphus saponin I_qt	472.78	4.39	2	4	32.69	0.42	-0.32	0.62	0.24	10.45
MOL012954	daechuine S3	626.93	4.37	2	10	20	0.23	-0.3	0.66	0.27
MOL012956	18658-41-8	500.76	4	3	8	21.53	0.5	0.18	0.71	0.33
MOL012961	jujuboside A_qt	472.78	4.39	2	4	36.67	0.54	-0.05	0.62	0.23	9.47
MOL012963	zizybeoside II	594.63	-4.01	10	16	22.83	-3.06	-3.66	0.75	0.29
MOL012968	1-(4-Coumaroyl)alpha-rhamnopyranose	310.33	0.62	4	7	25.77	-0.57	-1.15	0.22	0.37
MOL012972	6'-O-p-Coumaroylgenipingentiobioside	696.72	-1.75	8	17	20.88	-2.67	-3.55	0.45	0.32
MOL012973	Adouetine X	500.76	4	3	8	21.53	0.56	0.21	0.71	0.31
MOL012974	Asimilobine	267.35	2.78	2	3	25.34	1.03	0.56	0.33	0.28
MOL012976	coumestrol	268.23	3.01	2	5	32.49	0.55	-0.48	0.34	0.36	7.75
MOL012977	Daechuine S10	564.75	2.93	3	10	21.87	0.13	-0.58	0.76	0.35
MOL012978	Daechuine S26	534.72	2.95	3	9	22.84	0.27	-0.07	0.82	0.34
MOL012979	Daechuine S5	488.75	3.93	3	8	21.5	0.6	0.42	0.68	0.29
MOL012980	Daechuine S6	548.75	3.2	2	9	46.48	0.38	0.02	0.79	0.3	6.09
MOL012981	Daechuine S7	514.74	2.81	2	9	44.82	0.46	0.12	0.83	0.27	4.67
MOL012982	Daechuine S8-1	626.93	4.24	2	10	20	0.27	-0.11	0.65	0.27
MOL012986	Jujubasaponin V_qt	472.78	4.65	2	4	36.99	0.38	-0.51	0.63	0.25	9.51
MOL012989	Jujuboside C_qt	472.78	4.39	2	4	40.26	0.37	-0.43	0.62	0.24	9.67
MOL012992	Mauritine D	342.46	1.62	2	6	89.13	0.59	0.62	0.45	0.03	4.91
MOL001454	berberine	336.39	3.45	0	4	36.86	1.24	0.57	0.78	0.19	6.57
MOL001522	(S)-Coclaurine	285.37	2.83	3	4	42.35	0.7	0.06	0.24	0.29	4.41
MOL000211	Mairin	456.78	6.52	2	3	55.38	0.73	0.22	0.78	0.26	8.87
MOL002307	20-Hexadecanoylingenol	586.94	7.38	3	6	28.2	0.3	-0.04	0.68	0.24
MOL000263	oleanolic acid	456.78	6.42	2	3	29.02	0.59	0.07	0.76	0.25
MOL000449	Stigmasterol	412.77	7.64	1	1	43.83	1.44	1	0.76	0.22	5.57
MOL003410	Ziziphin_qt	472.78	4.39	2	4	66.95	0.49	-0.12	0.62	0.24	10
MOL000358	beta-sitosterol	414.79	8.08	1	1	36.91	1.32	0.99	0.75	0.23	5.36
MOL003776	oleanonic acid	454.76	6.38	1	3	21.55	0.61	0.16	0.76	0.27
MOL004350	Ruvoside_qt	390.57	2.29	3	5	36.12	-0.31	-1.13	0.76	0.24	7.21
MOL004498	12-O-Nicotinoylisolineolone	469.63	1.32	3	7	20.7	-0.54	-1.19	0.83	0.31
MOL000492	(+)-catechin	290.29	1.92	5	6	54.83	-0.03	-0.73	0.24	0	0.61
MOL005360	malkangunin	432.56	1.84	2	7	57.71	0.22	-0.17	0.63	0.3	4.09
MOL005386	Vulgarin	264.35	1.31	1	4	29.21	0.03	-0.27	0.2	0.36
MOL000627	Stepholidine	327.41	3.1	2	5	33.11	0.83	0.29	0.54	0.22	1.54
MOL000628	darutoside	574.93	5.89	4	6	21.32	-0.26	-0.96	0.63	0.22
MOL000675	oleic acid	282.52	6.84	1	2	33.13	1.17	0.78	0.14	0.2	4.99
MOL006986	Nornuciferine	281.38	3.03	1	3	22.63	1.17	0.76	0.36	0.23
MOL007213	Nuciferin	295.41	3.57	0	3	34.43	1.22	0.83	0.4	0.24	3.07
MOL000749	Linoleic	280.5	6.39	1	2	41.9	1.23	0.81	0.14	0.23	5.27
MOL000783	Protoporphyrin	562.72	8.24	4	6	30.86	0.67	-0.63	0.56	0.3	3.83
MOL000787	Fumarine	353.4	2.95	0	6	59.26	0.56	-0.13	0.83	0.3	23.46
MOL008034	21302-79-4	486.76	5.36	3	5	73.52	-0.05	-0.54	0.77	0.31	14.21
MOL008647	Moupinamide	313.38	2.86	3	5	86.71	0.55	-0.51	0.26	0.33	3.71
MOL002773	beta-carotene	536.96	12	0	0	37.18	2.25	1.52	0.58	0.33	4.36
MOL000096	(-)-catechin	290.29	1.92	5	6	49.68	-0.03	-0.78	0.24	0.35	0.38
MOL000098	quercetin	302.25	1.5	5	7	46.43	0.05	-0.77	0.28	0.38	14.4
MOL000357	Sitogluside	576.95	6.34	4	6	20.63	-0.14	-0.93	0.62	0.23
MOL013357	(3S,6R,8S,9S,10R,13R,14S,17R)-17-[(1R,4R)-4-ethyl-1,5-dimethylhexyl]-10,13-dimethyl-2,3,6,7,8,9,11,12,14,15,16,17-dodecahydro-1H-cyclopenta[a]phenanthrene-3,6-diol	430.79	7.12	2	2	34.37	0.82	0.31	0.78	0.21	5.81

## Sheet: GX
MOLID	ingredients	MW	AlogP	Hdon	Hacc	OB（%）	Caco-2	BBB	DL	FASA	HL
MOL000131	EIC	280.5	6.39	1	2	41.9	1.16	0.9	0.14	0.25	7.5
MOL001600	copaene	204.39	4.17	0	0	29.47	1.81	2.04	0.12	0.22
MOL000208	()-Aromadendrene	204.39	4.22	0	0	55.74	1.81	2.06	0.1	0.26	11.84
MOL002502	copaene	204.39	4.17	0	0	24.08	1.81	2.06	0.12	0.23
MOL000266	beta-Cubebene	204.39	4.22	0	0	32.81	1.83	2.02	0.11	0.25	6.59
MOL002697	junipene	204.39	4.18	0	0	44.07	1.82	2.14	0.11	0.25	12.2
MOL003522	()-Sativene	204.39	4.22	0	0	37.41	1.78	1.99	0.1	0.24	14.2
MOL003538	()-Ledene	204.39	4.36	0	0	51.84	1.86	2.16	0.1	0.23	11.79
MOL002003	(-)-Caryophyllene oxide	220.39	3.52	0	1	32.67	1.58	1.76	0.13	0.28	6.51
MOL000057	DIBP	278.38	3.92	0	4	49.63	0.85	0.68	0.13	0	3.94
MOL000612	(-)-alpha-cedrene	204.39	4.12	0	0	55.56	1.81	2.16	0.1	0.24	4.82
MOL000675	oleic acid	282.52	6.84	1	2	33.13	1.17	0.78	0.14	0.2	4.99

## Sheet: NWWZ
MOLID	ingredients	MW	AlogP	Hdon	Hacc	OB（%）	Caco-2	BBB	DL	FASA	HL
MOL009198	(+)-Anwulignan	328.44	5.16	1	4	23.61	1.13	0.52	0.32	0.28
MOL009199	Interiotherin B	498.57	4.75	1	9	31.76	0.43	0	0.77	0.24	13.87
MOL009200	changnanic acid	470.76	6.9	2	4	35.34	0.26	-0.4	0.8	0.32	8.73
MOL009206	heteroclitin F	514.57	4.06	0	10	29.68	0.07	-0.17	0.87	0.28
MOL009207	heteroclitin G	384.46	2.25	1	6	27.97	0.62	0.25	0.76	0.24
MOL009210	Kadsulignan C	578.61	1.9	1	11	30.23	-0.17	-0.71	0.52	0.31	12.97
MOL009211	kadsulactone	452.74	6.07	0	3	42.87	0.96	0.53	0.76	0.28	6.05
MOL009213	kadsulignan B	474.55	1.61	0	9	30.63	0.24	-0.23	0.84	0.21	6.72
MOL009215	Kadsurin	458.55	4.41	0	8	24.73	0.86	0.54	0.85	0.13
MOL009216	kadsutherin	468.59	6.4	0	7	25.64	0.88	0.75	0.86	0.21
MOL009217	neokadsuranic acid A	452.74	6.85	1	3	43.35	0.64	0	0.85	0.3	12.27
MOL009218	neokadsuranic acid B	452.74	7.05	1	3	43.1	0.62	0.12	0.85	0.28	10.59
MOL009219	neokadsuranic acid C	456.73	5.89	2	4	35.4	0.26	-0.62	0.85	0.27	10
MOL009220	neokadsuranin	414.49	3.77	0	7	33.35	0.89	0.56	0.88	0.16	6.18
MOL009222	schisanlactone A	464.7	6.4	0	4	42.17	0.91	0.24	0.86	0.31	6.73
MOL009224	schisanlactone E	468.74	6.34	1	4	40.83	0.58	-0.16	0.84	0.31	8.65
MOL009226	schisantherin J	636.75	5.93	1	11	29.2	0	-0.71	0.56	0.27
MOL009228	schisantherin M	580.68	6.65	0	10	27.93	0.52	-0.01	0.57	0.26
MOL009229	schizandronic acid	454.76	6.63	1	3	40.45	0.56	-0.18	0.82	0.29	5.99
MOL009235	angusifolin B	562.61	4.98	0	10	34.82	0.42	-0.46	0.56	0.29	14.76

## Sheet: MD
Alpha-Humulene
Humulene
Î‘-Humulene
Î‘-Cyperene
Camphor
1-Isopropyl-4-Methylcyclohex-3-Enol
4-Terpineol
Stigmasterol
3,7-Dimethylocta-1
6-Dien-3-Ol
Linalol
Linalool
Oleanolic Acid
Alexandrin
Daucosterol
Caproic Acid
Eleutheroside A
Sitogluside
Strumaroside
Î’-Sitosterol-Î’-D-Glucoside
Adenosine
Adenine Nucleoside
Guaiol
Î’-Patchoulene
N-Trans-Feruloyltyramine
Ruscogenin
6-Aldehydo-Isoophiopogone A
6-Aldehydo-Isoophiopogone B
Borneol-2-O-Î’-D-Apiofuranosyl(1â†’6)-Î’-D-Glucopyranoside
Borneol-2-O-Î‘-L-Arabinofuranosyl(1â†’6)-Î’-D-Glucopyranoside
Borneol-2-O-Î’-D-Glucopyranoside
N-( Trans-P-Coumaroyl) Tyramine
5，7-Dihydroxy-6
8-Dimethyl-3-(4'-Hydroxy-3'-Methoxybenzyl)Chroman-4-One
5-Hydroxy-7
8-Dimethoxy-6-Methyl-3-(3',4'-Dihydroxybenzyl) Chroman-4-One
N-[Î’-Hydroxy-Î’-(4-Hydroxyphenyl)]Ethyl-4-Hydroxy Cinnamide
2'-Hydroxymethylophiopogonone A
Isoophiopogonone A
Jasmololone
Methyl Ophiopogonanone A
Methyl Ophiopogonanone B
Ophiogenin-3-O-Î‘-L-Rhamnopyranosyl(1â†’2)-Î’-D-Glucopyranoside
Ophiopogon A
Ophiopogonanone A
Ophiopogonanone B
Ophiopogonanone C
Ophiopogonanone D
Ophiopogonanone E
Ophiopogonanone F
Ophiopogon B
Ophiopogonin A
Ophiopogonin B
Ophiopogonin C'
Ophiopogonin D
Ophiopogonin D'
Ophiopogonone A
Ophiopogonone C
Ophiopogonoside A
Ruscogenin 1-O-Sulfate
2,5,7-Trihydroxy-6,8-Dimethyl-3-(4'-Methoxybenzyl)Chroman-4-One
2,5,7-Trihydroxy-6,8-Dimethyl-3-(3',4'-Methylenedioxybenzyl)-Chroman-4-One
5,7,2'-Trihydroxy-6-Methyl-3-(3',4'-Methylenedioxybenzyl) Chromone
Cyperene
Glycerol
Jasmololone
Longifolene
