# Supplementary material for: Huangqi fuling decoction inhibits the invasion and metastasis of gastric cancer via the TNF signaling pathway
Source: Research Square preprint supplement (doi:10.21203/rs.3.rs-5906521/v1), 2025-04-28
Supplement: Supplementary file 2 [file 75e0bd5cc9f02ad8f3c61c32.xlsx]

## Sheet: Sheet1
Gene Symbol	Description	Category	Gifts	GC Id	Relevance score
CDH1	Cadherin 1	Protein Coding	52	GC16P068737	172.275
TP53	Tumor Protein P53	Protein Coding	55	GC17M007661	152.467
MET	MET Proto-Oncogene, Receptor Tyrosine Kinase	Protein Coding	56	GC07P116672	113.374
KRAS	KRAS Proto-Oncogene, GTPase	Protein Coding	54	GC12M025204	108.801
APC	APC Regulator Of WNT Signaling Pathway	Protein Coding	51	GC05P112707	99.8043
PIK3CA	Phosphatidylinositol-4,5-Bisphosphate 3-Kinase Catalytic Subunit Alpha	Protein Coding	55	GC03P179148	99.2719
ERBB2	Erb-B2 Receptor Tyrosine Kinase 2	Protein Coding	58	GC17P039687	96.171
PTEN	Phosphatase And Tensin Homolog	Protein Coding	54	GC10P093576	85.0816
MLH1	MutL Homolog 1	Protein Coding	51	GC03P036993	83.2364
MSH2	MutS Homolog 2	Protein Coding	52	GC02P047403	80.8946
CTNNB1	Catenin Beta 1	Protein Coding	56	GC03P041236	79.8793
MSH6	MutS Homolog 6	Protein Coding	51	GC02P047695	79.6258
MIR21	MicroRNA 21	RNA Gene	26	GC17P059872	76.6696
EGFR	Epidermal Growth Factor Receptor	Protein Coding	58	GC07P055019	75.517
CDKN2A	Cyclin Dependent Kinase Inhibitor 2A	Protein Coding	52	GC09M021967	73.9205
BRCA2	BRCA2 DNA Repair Associated	Protein Coding	50	GC13P032315	73.1264
BRAF	B-Raf Proto-Oncogene, Serine/Threonine Kinase	Protein Coding	55	GC07M140740	64.8915
RET	Ret Proto-Oncogene	Protein Coding	57	GC10P043208	64.0036
BRCA1	BRCA1 DNA Repair Associated	Protein Coding	52	GC17M043044	63.9724
PMS2	PMS1 Homolog 2, Mismatch Repair System Component	Protein Coding	51	GC07M005973	63.3518
ATM	ATM Serine/Threonine Kinase	Protein Coding	55	GC11P108222	61.8381
MUTYH	MutY DNA Glycosylase	Protein Coding	48	GC01M045329	61.2206
MIR34A	MicroRNA 34a	RNA Gene	25	GC01M009151	60.7454
HRAS	HRas Proto-Oncogene, GTPase	Protein Coding	55	GC11M003889	60.298
AKT1	AKT Serine/Threonine Kinase 1	Protein Coding	56	GC14M104769	60.0153
MIR221	MicroRNA 221	RNA Gene	22	GC0XM045746	59.2869
MIR141	MicroRNA 141	RNA Gene	23	GC12P022385	57.4621
MIR200C	MicroRNA 200c	RNA Gene	26	GC12P022384	56.8458
MIR222	MicroRNA 222	RNA Gene	22	GC0XM045747	56.3011
TGFBR2	Transforming Growth Factor Beta Receptor 2	Protein Coding	54	GC03P030623	56.0098
FGFR2	Fibroblast Growth Factor Receptor 2	Protein Coding	58	GC10M121478	55.8165
MTOR	Mechanistic Target Of Rapamycin Kinase	Protein Coding	56	GC01M011106	55.0338
VHL	Von Hippel-Lindau Tumor Suppressor	Protein Coding	49	GC03P012694	54.5997
SMAD4	SMAD Family Member 4	Protein Coding	54	GC18P051028	54.069
CHEK2	Checkpoint Kinase 2	Protein Coding	56	GC22M028687	53.8702
MIR20A	MicroRNA 20a	RNA Gene	23	GC13P091567	53.0516
MIR145	MicroRNA 145	RNA Gene	25	GC05P149430	51.7549
CCND1	Cyclin D1	Protein Coding	55	GC11P069641	51.6916
MIR143	MicroRNA 143	RNA Gene	26	GC05P149410	51.6188
STK11	Serine/Threonine Kinase 11	Protein Coding	53	GC19P001177	51.4096
CTNNA1	Catenin Alpha 1	Protein Coding	48	GC05P138613	50.5031
PTCH1	Patched 1	Protein Coding	52	GC09M095442	49.1545
MIR27A	MicroRNA 27a	RNA Gene	25	GC19M014544	49.0832
CASP8	Caspase 8	Protein Coding	55	GC02P201233	48.0265
NRAS	NRAS Proto-Oncogene, GTPase	Protein Coding	53	GC01M114704	47.8691
MIR93	MicroRNA 93	RNA Gene	23	GC07M102066	47.6858
IRF1	Interferon Regulatory Factor 1	Protein Coding	49	GC05M132440	47.2555
TERT	Telomerase Reverse Transcriptase	Protein Coding	53	GC05M001253	47.1705
IL1B	Interleukin 1 Beta	Protein Coding	50	GC02M112829	47.0488
MIR203A	MicroRNA 203a	RNA Gene	23	GC14P110181	45.9875
MIR106B	MicroRNA 106b	RNA Gene	23	GC07M102068	45.5637
RB1	RB Transcriptional Corepressor 1	Protein Coding	50	GC13P048303	45.533
FLCN	Folliculin	Protein Coding	44	GC17M017212	45.4871
EPCAM	Epithelial Cell Adhesion Molecule	Protein Coding	51	GC02P047345	45.3976
FGFR3	Fibroblast Growth Factor Receptor 3	Protein Coding	58	GC04P001795	45.2394
FHIT	Fragile Histidine Triad Diadenosine Triphosphatase	Protein Coding	46	GC03M059747	43.8925
MIR122	MicroRNA 122	RNA Gene	24	GC18P058451	43.2748
SDHD	Succinate Dehydrogenase Complex Subunit D	Protein Coding	47	GC11P112087	43.2343
CDC73	Cell Division Cycle 73	Protein Coding	48	GC01P193121	43.1521
MIR17	MicroRNA 17	RNA Gene	23	GC13P091350	43.051
KLF6	KLF Transcription Factor 6	Protein Coding	45	GC10M003779	41.5012
MIR200B	MicroRNA 200b	RNA Gene	23	GC01P001167	41.4475
VEGFA	Vascular Endothelial Growth Factor A	Protein Coding	51	GC06P043770	41.406
MIR25	MicroRNA 25	RNA Gene	22	GC07M100093	41.2572
MIR146A	MicroRNA 146a	RNA Gene	25	GC05P160485	40.7457
CASP10	Caspase 10	Protein Coding	50	GC02P201182	40.565
PRCC	Proline Rich Mitotic Checkpoint Control Factor	Protein Coding	41	GC01P156750	40.3643
SDHB	Succinate Dehydrogenase Complex Iron Sulfur Subunit B	Protein Coding	50	GC01M018178	40.3389
MIR205	MicroRNA 205	RNA Gene	23	GC01P209432	40.1504
OGG1	8-Oxoguanine DNA Glycosylase	Protein Coding	50	GC03P012644	40.0071
PALB2	Partner And Localizer Of BRCA2	Protein Coding	47	GC16M023603	40.0023
MIR126	MicroRNA 126	RNA Gene	24	GC09P136670	39.9622
HNF1B	HNF1 Homeobox B	Protein Coding	44	GC17M037686	39.4924
KIT	KIT Proto-Oncogene, Receptor Tyrosine Kinase	Protein Coding	56	GC04P054657	39.3674
C11orf65	Chromosome 11 Open Reading Frame 65	Protein Coding	34	GC11M108308	39.1512
SETD2	SET Domain Containing 2, Histone Lysine Methyltransferase	Protein Coding	50	GC03M047033	38.5895
IL1RN	Interleukin 1 Receptor Antagonist	Protein Coding	52	GC02P123138	37.9079
FASLG	Fas Ligand	Protein Coding	50	GC01P172628	37.4721
ESR1	Estrogen Receptor 1	Protein Coding	56	GC06P151656	37.4439
MIR451A	MicroRNA 451a	RNA Gene	20	GC17M028861	37.4
HNF1A	HNF1 Homeobox A	Protein Coding	48	GC12P120978	37.2658
MIR155	MicroRNA 155	RNA Gene	23	GC21P025573	37.1086
PTGS2	Prostaglandin-Endoperoxide Synthase 2	Protein Coding	51	GC01M186640	36.5247
MYC	MYC Proto-Oncogene, BHLH Transcription Factor	Protein Coding	54	GC08P127735	36.2828
BCL2	BCL2 Apoptosis Regulator	Protein Coding	53	GC18M063123	36.1137
MIR192	MicroRNA 192	RNA Gene	23	GC11M064891	35.9472
CDKN1A	Cyclin Dependent Kinase Inhibitor 1A	Protein Coding	51	GC06P087904	35.8286
ALK	ALK Receptor Tyrosine Kinase	Protein Coding	54	GC02M029190	35.8183
NKX2-1	NK2 Homeobox 1	Protein Coding	48	GC14M036516	35.8116
ATP4A	ATPase H+/K+ Transporting Subunit Alpha	Protein Coding	43	GC19M068622	35.8029
EGF	Epidermal Growth Factor	Protein Coding	54	GC04P109912	35.7682
MIR18A	MicroRNA 18a	RNA Gene	22	GC13P091571	35.7399
MEN1	Menin 1	Protein Coding	47	GC11M064803	35.7323
LRRC56	Leucine Rich Repeat Containing 56	Protein Coding	37	GC11P000518	35.4844
BAX	BCL2 Associated X, Apoptosis Regulator	Protein Coding	52	GC19P048954	35.2647
KRT7	Keratin 7	Protein Coding	44	GC12P052232	35.2606
PBRM1	Polybromo 1	Protein Coding	47	GC03M052545	35.0716
MIR215	MicroRNA 215	RNA Gene	21	GC01M220117	35.0713
MUC1	Mucin 1, Cell Surface Associated	Protein Coding	51	GC01M155185	34.9847
CDKN1B	Cyclin Dependent Kinase Inhibitor 1B	Protein Coding	50	GC12P022586	34.8483
MIR125A	MicroRNA 125a	RNA Gene	24	GC19P070321	34.8115
MIR150	MicroRNA 150	RNA Gene	23	GC19M049500	34.5162
MIR19A	MicroRNA 19a	RNA Gene	23	GC13P091566	34.511
MIR200A	MicroRNA 200a	RNA Gene	22	GC01P004110	34.4917
MIR29A	MicroRNA 29a	RNA Gene	23	GC07M130876	34.0344
DIRC3	Disrupted In Renal Carcinoma 3	RNA Gene	24	GC02M217284	33.6592
GAST	Gastrin	Protein Coding	41	GC17P041712	33.0328
MIR210	MicroRNA 210	RNA Gene	23	GC11M003894	32.8883
MIR195	MicroRNA 195	RNA Gene	23	GC17M007018	32.4331
SMARCA4	SWI/SNF Related, Matrix Associated, Actin Dependent Regulator Of Chromatin, Subfamily A, Member 4	Protein Coding	53	GC19P010932	32.3172
NTRK1	Neurotrophic Receptor Tyrosine Kinase 1	Protein Coding	55	GC01P156815	32.1391
MIR15B	MicroRNA 15b	RNA Gene	21	GC03P160404	32.0242
MUC5AC	Mucin 5AC, Oligomeric Mucus/Gel-Forming	Protein Coding	43	GC11P001988	32.0224
HIF1A	Hypoxia Inducible Factor 1 Subunit Alpha	Protein Coding	51	GC14P061695	31.7741
GHET1	Gastric Carcinoma Proliferation Enhancing Transcript 1	RNA Gene	15	GC07P149647	31.7049
DCC	DCC Netrin 1 Receptor	Protein Coding	50	GC18P052340	31.6485
MDM2	MDM2 Proto-Oncogene	Protein Coding	55	GC12P068808	31.619
MIR373	MicroRNA 373	RNA Gene	22	GC19P070437	31.5536
MUC6	Mucin 6, Oligomeric Mucus/Gel-Forming	Protein Coding	42	GC11M001012	31.5169
MIR34C	MicroRNA 34c	RNA Gene	23	GC11P111943	31.4947
STAT3	Signal Transducer And Activator Of Transcription 3	Protein Coding	56	GC17M042313	31.2736
MAP2K1	Mitogen-Activated Protein Kinase Kinase 1	Protein Coding	55	GC15P066386	31.1616
MMP9	Matrix Metallopeptidase 9	Protein Coding	56	GC20P046008	31.1528
MIR148A	MicroRNA 148a	RNA Gene	23	GC07M025993	31.0406
MAP3K6	Mitogen-Activated Protein Kinase Kinase Kinase 6	Protein Coding	45	GC01M027945	30.7554
FAS	Fas Cell Surface Death Receptor	Protein Coding	53	GC10P093591	30.6657
MIR127	MicroRNA 127	RNA Gene	23	GC14P110110	30.6593
MIR29C	MicroRNA 29c	RNA Gene	20	GC01M207802	30.5318
MIR15A	MicroRNA 15a	RNA Gene	19	GC13M050049	30.5113
MIR31	MicroRNA 31	RNA Gene	22	GC09M021793	30.3999
WWOX	WW Domain Containing Oxidoreductase	Protein Coding	48	GC16P078099	30.3525
CD274	CD274 Molecule	Protein Coding	47	GC09P005450	30.0858
TFF1	Trefoil Factor 1	Protein Coding	45	GC21M042362	30.0316
TNFRSF10B	TNF Receptor Superfamily Member 10b	Protein Coding	52	GC08M023020	29.9404
CD44	CD44 Molecule (Indian Blood Group)	Protein Coding	50	GC11P035139	29.9294
MIR10B	MicroRNA 10b	RNA Gene	23	GC02P176150	29.8671
TSC1	TSC Complex Subunit 1	Protein Coding	50	GC09M132891	29.4944
ING1	Inhibitor Of Growth Family Member 1	Protein Coding	45	GC13P110712	29.2719
ARID1A	AT-Rich Interaction Domain 1A	Protein Coding	47	GC01P026693	29.2275
KRT20	Keratin 20	Protein Coding	42	GC17M040875	29.1623
TFE3	Transcription Factor Binding To IGHM Enhancer 3	Protein Coding	47	GC0XM049028	29.0781
FBXW7	F-Box And WD Repeat Domain Containing 7	Protein Coding	46	GC04M152321	28.9441
MIR223	MicroRNA 223	RNA Gene	24	GC0XP066018	28.9246
CEACAM5	CEA Cell Adhesion Molecule 5	Protein Coding	45	GC19P069849	28.8718
MIR204	MicroRNA 204	RNA Gene	25	GC09M070809	28.776
MIR483	MicroRNA 483	RNA Gene	22	GC11M004005	28.775
AXIN1	Axin 1	Protein Coding	48	GC16M000287	28.5862
CDX2	Caudal Type Homeobox 2	Protein Coding	45	GC13M027962	28.5002
GIP	Gastric Inhibitory Polypeptide	Protein Coding	43	GC17M048958	28.4603
RAD51C	RAD51 Paralog C	Protein Coding	46	GC17P058692	28.4291
CHGA	Chromogranin A	Protein Coding	47	GC14P092947	28.3148
MIR23B	MicroRNA 23b	RNA Gene	22	GC09P095085	28.2988
BIRC5	Baculoviral IAP Repeat Containing 5	Protein Coding	48	GC17P078214	28.2674
GIPR	Gastric Inhibitory Polypeptide Receptor	Protein Coding	47	GC19P045668	28.1576
TNF	Tumor Necrosis Factor	Protein Coding	54	GC06P087731	28.1494
NOTCH1	Notch Receptor 1	Protein Coding	55	GC09M137632	28.0781
BCL10	BCL10 Immune Signaling Adaptor	Protein Coding	46	GC01M085265	28.0776
MITF	Melanocyte Inducing Transcription Factor	Protein Coding	50	GC03P069788	28.0144
CXCL8	C-X-C Motif Chemokine Ligand 8	Protein Coding	44	GC04P073740	27.8763
MKI67	Marker Of Proliferation Ki-67	Protein Coding	47	GC10M128096	27.8184
CASP3	Caspase 3	Protein Coding	52	GC04M184627	27.8047
MIR30E	MicroRNA 30e	RNA Gene	25	GC01P040754	27.7432
TGFB1	Transforming Growth Factor Beta 1	Protein Coding	55	GC19M041301	27.7402
RAD51D	RAD51 Paralog D	Protein Coding	41	GC17M035092	27.5772
IL6	Interleukin 6	Protein Coding	53	GC07P022725	27.4819
MIR106A	MicroRNA 106a	RNA Gene	20	GC0XM134328	27.4706
ROS1	ROS Proto-Oncogene 1, Receptor Tyrosine Kinase	Protein Coding	48	GC06M117287	27.4494
PTCH2	Patched 2	Protein Coding	48	GC01M044819	27.4307
SRC	SRC Proto-Oncogene, Non-Receptor Tyrosine Kinase	Protein Coding	54	GC20P037344	27.2627
MMP2	Matrix Metallopeptidase 2	Protein Coding	55	GC16P055390	27.0844
NBN	Nibrin	Protein Coding	50	GC08M089933	27.0254
BMPR1A	Bone Morphogenetic Protein Receptor Type 1A	Protein Coding	53	GC10P093501	26.8602
SDHC	Succinate Dehydrogenase Complex Subunit C	Protein Coding	46	GC01P161314	26.7565
ASPSCR1	ASPSCR1 Tether For SLC2A4, UBX Domain Containing	Protein Coding	44	GC17P081976	26.6666
MIR22	MicroRNA 22	RNA Gene	23	GC17M001713	26.6649
MIR196B	MicroRNA 196b	RNA Gene	23	GC07M027633	26.6451
MIR197	MicroRNA 197	RNA Gene	22	GC01P109549	26.606
EP300	E1A Binding Protein P300	Protein Coding	54	GC22P041114	26.5703
MIR185	MicroRNA 185	RNA Gene	24	GC22P039755	26.5286
PPARG	Peroxisome Proliferator Activated Receptor Gamma	Protein Coding	55	GC03P012287	26.4382
MIR100	MicroRNA 100	RNA Gene	23	GC11M122152	26.3346
MIR181A1	MicroRNA 181a-1	RNA Gene	20	GC01M198860	26.2743
MIR23A	MicroRNA 23a	RNA Gene	23	GC19M014545	26.1937
BRIP1	BRCA1 Interacting Helicase 1	Protein Coding	50	GC17M061679	25.9207
CDK4	Cyclin Dependent Kinase 4	Protein Coding	56	GC12M057752	25.9198
KRT19	Keratin 19	Protein Coding	46	GC17M041523	25.7954
BARD1	BRCA1 Associated RING Domain 1	Protein Coding	50	GC02M214725	25.702
MIR224	MicroRNA 224	RNA Gene	18	GC0XM151958	25.6708
AFP	Alpha Fetoprotein	Protein Coding	48	GC04P073431	25.6028
GSTP1	Glutathione S-Transferase Pi 1	Protein Coding	53	GC11P067583	25.5934
MIR486-1	MicroRNA 486-1	RNA Gene	20	GC08M041660	25.5054
ATP12A	ATPase H+/K+ Transporting Non-Gastric Alpha2 Subunit	Protein Coding	44	GC13P024680	25.4921
MIR182	MicroRNA 182	RNA Gene	23	GC07M129770	25.4219
SMO	Smoothened, Frizzled Class Receptor	Protein Coding	52	GC07P132235	25.3997
FH	Fumarate Hydratase	Protein Coding	50	GC01M241499	25.3755
MIR34B	MicroRNA 34b	RNA Gene	23	GC11P111958	25.3554
H19	H19 Imprinted Maternally Expressed Transcript	RNA Gene	30	GC11M001995	25.3395
AURKA	Aurora Kinase A	Protein Coding	53	GC20M056370	25.0813
GSTM1	Glutathione S-Transferase Mu 1	Protein Coding	44	GC01P109687	25.0106
MIR183	MicroRNA 183	RNA Gene	21	GC07M129839	24.9884
PAX8	Paired Box 8	Protein Coding	47	GC02M113215	24.9738
IGF2R	Insulin Like Growth Factor 2 Receptor	Protein Coding	48	GC06P159969	24.8884
ESR2	Estrogen Receptor 2	Protein Coding	51	GC14M064084	24.8385
CDKN3	Cyclin Dependent Kinase Inhibitor 3	Protein Coding	44	GC14P054398	24.8378
XRCC1	X-Ray Repair Cross Complementing 1	Protein Coding	46	GC19M043543	24.8033
PMS1	PMS1 Homolog 1, Mismatch Repair System Component	Protein Coding	44	GC02P189784	24.7007
RNF6	Ring Finger Protein 6	Protein Coding	41	GC13M026132	24.527
POLE	DNA Polymerase Epsilon, Catalytic Subunit	Protein Coding	50	GC12M132695	24.4094
SST	Somatostatin	Protein Coding	43	GC03M187668	24.2235
KRT5	Keratin 5	Protein Coding	48	GC12M052514	24.1229
TP73	Tumor Protein P73	Protein Coding	48	GC01P003652	24.0549
MMP1	Matrix Metallopeptidase 1	Protein Coding	54	GC11M102810	24.0431
TGFA	Transforming Growth Factor Alpha	Protein Coding	49	GC02M070447	23.8886
MSH3	MutS Homolog 3	Protein Coding	46	GC05P080654	23.8777
MIR130A	MicroRNA 130a	RNA Gene	23	GC11P057641	23.8143
TSC2	TSC Complex Subunit 2	Protein Coding	51	GC16P012688	23.8108
SMARCB1	SWI/SNF Related, Matrix Associated, Actin Dependent Regulator Of Chromatin, Subfamily B, Member 1	Protein Coding	48	GC22P023786	23.7774
JUN	Jun Proto-Oncogene, AP-1 Transcription Factor Subunit	Protein Coding	50	GC01M058780	23.6838
MAPK1	Mitogen-Activated Protein Kinase 1	Protein Coding	54	GC22M021759	23.6659
TFEB	Transcription Factor EB	Protein Coding	44	GC06M069415	23.6336
MST1R	Macrophage Stimulating 1 Receptor	Protein Coding	51	GC03M051443	23.6261
MIR214	MicroRNA 214	RNA Gene	24	GC01M172234	23.6148
SYP	Synaptophysin	Protein Coding	48	GC0XM049187	23.5945
XRCC3	X-Ray Repair Cross Complementing 3	Protein Coding	45	GC14M103697	23.5531
MIR98	MicroRNA 98	RNA Gene	20	GC0XM053641	23.5486
MIR181B1	MicroRNA 181b-1	RNA Gene	22	GC01M198858	23.5187
MIR335	MicroRNA 335	RNA Gene	22	GC07P130496	23.4684
MTUS1	Microtubule Associated Scaffold Protein 1	Protein Coding	38	GC08M017643	23.3287
MIR584	MicroRNA 584	RNA Gene	20	GC05M149062	23.3249
TYMS	Thymidylate Synthetase	Protein Coding	51	GC18P000657	23.3228
EGFR-AS1	EGFR Antisense RNA 1	RNA Gene	18	GC07M055179	23.3111
ERBB3	Erb-B2 Receptor Tyrosine Kinase 3	Protein Coding	55	GC12P057357	23.3033
CDKN2B	Cyclin Dependent Kinase Inhibitor 2B	Protein Coding	49	GC09M022002	23.2649
TP63	Tumor Protein P63	Protein Coding	50	GC03P189598	23.2273
FOXE1	Forkhead Box E1	Protein Coding	44	GC09P097853	23.2062
MIR146B	MicroRNA 146b	RNA Gene	23	GC10P102436	23.1654
PGR	Progesterone Receptor	Protein Coding	51	GC11M101030	23.1501
MRE11	MRE11 Homolog, Double Strand Break Repair Nuclease	Protein Coding	50	GC11M097712	23.0813
RHOA	Ras Homolog Family Member A	Protein Coding	52	GC03M049359	23.0689
MIRLET7B	MicroRNA Let-7b	RNA Gene	22	GC22P046119	23.0004
MIR296	MicroRNA 296	RNA Gene	20	GC20M058817	22.9909
HGF	Hepatocyte Growth Factor	Protein Coding	54	GC07M081699	22.9275
MIR107	MicroRNA 107	RNA Gene	22	GC10M089600	22.9223
AR	Androgen Receptor	Protein Coding	54	GC0XP067544	22.8937
BCL2L1	BCL2 Like 1	Protein Coding	50	GC20M031664	22.8489
MLH3	MutL Homolog 3	Protein Coding	44	GC14M075013	22.8133
PDGFRL	Platelet Derived Growth Factor Receptor Like	Protein Coding	45	GC08P017576	22.7708
IGF2	Insulin Like Growth Factor 2	Protein Coding	51	GC11M003998	22.7289
KDR	Kinase Insert Domain Receptor	Protein Coding	56	GC04M055078	22.7248
MIR499A	MicroRNA 499a	RNA Gene	23	GC20P034990	22.6264
HOTAIR	HOX Transcript Antisense RNA	RNA Gene	26	GC12M053962	22.6253
MIR191	MicroRNA 191	RNA Gene	23	GC03M051371	22.6152
VEGFC	Vascular Endothelial Growth Factor C	Protein Coding	50	GC04M176683	22.5999
IGF1R	Insulin Like Growth Factor 1 Receptor	Protein Coding	57	GC15P098648	22.5585
MIR193A	MicroRNA 193a	RNA Gene	22	GC17P031559	22.5476
RAD51	RAD51 Recombinase	Protein Coding	54	GC15P040694	22.5196
TYMP	Thymidine Phosphorylase	Protein Coding	50	GC22M050525	22.5039
EZH2	Enhancer Of Zeste 2 Polycomb Repressive Complex 2 Subunit	Protein Coding	56	GC07M148807	22.4891
MSR1	Macrophage Scavenger Receptor 1	Protein Coding	48	GC08M016107	22.4583
RASSF1	Ras Association Domain Family Member 1	Protein Coding	45	GC03M050329	22.4395
NME1	NME/NM23 Nucleoside Diphosphate Kinase 1	Protein Coding	48	GC17P059079	22.4261
HULC	Hepatocellular Carcinoma Up-Regulated Long Non-Coding RNA	RNA Gene	23	GC06P008438	22.4128
MIR24-2	MicroRNA 24-2	RNA Gene	23	GC19M014543	22.3155
MIR196A2	MicroRNA 196a-2	RNA Gene	24	GC12P055154	22.2448
SLC22A18	Solute Carrier Family 22 Member 18	Protein Coding	45	GC11P002899	22.2172
TFF2	Trefoil Factor 2	Protein Coding	44	GC21M042346	22.1599
MIRLET7C	MicroRNA Let-7c	RNA Gene	25	GC21P016551	22.1235
KRT18	Keratin 18	Protein Coding	51	GC12P052948	22.0195
IFNG	Interferon Gamma	Protein Coding	52	GC12M068154	21.9685
GHRL	Ghrelin And Obestatin Prepropeptide	Protein Coding	45	GC03M010285	21.9644
CBLIF	Cobalamin Binding Intrinsic Factor	Protein Coding	44	GC11M059829	21.9566
ABCB1	ATP Binding Cassette Subfamily B Member 1	Protein Coding	53	GC07M087504	21.9267
MIR137	MicroRNA 137	RNA Gene	22	GC01M098046	21.8238
LOC100507346	Uncharacterized LOC100507346	RNA Gene	11	GC09P095463	21.7786
PSCA	Prostate Stem Cell Antigen	Protein Coding	41	GC08P142670	21.7771
MIR140	MicroRNA 140	RNA Gene	26	GC16P069934	21.7586
HRH2	Histamine Receptor H2	Protein Coding	49	GC05P175659	21.6319
NFE2L2	NFE2 Like BZIP Transcription Factor 2	Protein Coding	53	GC02M177227	21.6286
ZFHX3	Zinc Finger Homeobox 3	Protein Coding	44	GC16M072782	21.6243
MMP7	Matrix Metallopeptidase 7	Protein Coding	50	GC11M102425	21.6151
MIRLET7G	MicroRNA Let-7g	RNA Gene	21	GC03M052268	21.5458
ENO2	Enolase 2	Protein Coding	50	GC12P006913	21.5423
MIR96	MicroRNA 96	RNA Gene	23	GC07M129774	21.5421
CA9	Carbonic Anhydrase 9	Protein Coding	50	GC09P035673	21.5041
NFKB1	Nuclear Factor Kappa B Subunit 1	Protein Coding	55	GC04P102501	21.4932
FGFR1	Fibroblast Growth Factor Receptor 1	Protein Coding	59	GC08M038400	21.4687
PCNA	Proliferating Cell Nuclear Antigen	Protein Coding	53	GC20M005114	21.4685
MIR133B	MicroRNA 133b	RNA Gene	23	GC06P052148	21.4322
PTPN11	Protein Tyrosine Phosphatase Non-Receptor Type 11	Protein Coding	55	GC12P112418	21.3988
FANCC	FA Complementation Group C	Protein Coding	50	GC09M095099	21.3862
SUFU	SUFU Negative Regulator Of Hedgehog Signaling	Protein Coding	45	GC10P102503	21.3045
MALAT1	Metastasis Associated Lung Adenocarcinoma Transcript 1	RNA Gene	26	GC11P070433	21.2587
NTRK3	Neurotrophic Receptor Tyrosine Kinase 3	Protein Coding	55	GC15M087859	21.2241
PRKD1	Protein Kinase D1	Protein Coding	52	GC14M029576	21.126
ERCC6	ERCC Excision Repair 6, Chromatin Remodeling Factor	Protein Coding	48	GC10M049454	21.0376
PLAUR	Plasminogen Activator, Urokinase Receptor	Protein Coding	47	GC19M043646	20.9171
ERCC2	ERCC Excision Repair 2, TFIIH Core Complex Helicase Subunit	Protein Coding	50	GC19M045349	20.8896
POLD1	DNA Polymerase Delta 1, Catalytic Subunit	Protein Coding	48	GC19P070251	20.8198
ERCC1	ERCC Excision Repair 1, Endonuclease Non-Catalytic Subunit	Protein Coding	48	GC19M068005	20.7958
PDPN	Podoplanin	Protein Coding	44	GC01P013583	20.792
PPP2R1B	Protein Phosphatase 2 Scaffold Subunit Abeta	Protein Coding	49	GC11M111695	20.7354
MIR429	MicroRNA 429	RNA Gene	22	GC01P004111	20.7007
SFPQ	Splicing Factor Proline And Glutamine Rich	Protein Coding	45	GC01M035176	20.6908
BIRC3	Baculoviral IAP Repeat Containing 3	Protein Coding	48	GC11P102317	20.4897
CASP9	Caspase 9	Protein Coding	49	GC01M015491	20.432
PHB1	Prohibitin 1	Protein Coding	48	GC17M049452	20.4229
RHBDF2	Rhomboid 5 Homolog 2	Protein Coding	45	GC17M076470	20.3897
CXCR4	C-X-C Motif Chemokine Receptor 4	Protein Coding	55	GC02M136114	20.3746
MIRLET7D	MicroRNA Let-7d	RNA Gene	24	GC09P094178	20.3292
SNAI1	Snail Family Transcriptional Repressor 1	Protein Coding	48	GC20P049982	20.3268
SMAD2	SMAD Family Member 2	Protein Coding	53	GC18M047809	20.3001
NONO	Non-POU Domain Containing Octamer Binding	Protein Coding	48	GC0XP071255	20.2153
SLC2A1	Solute Carrier Family 2 Member 1	Protein Coding	56	GC01M042925	20.0965
CLTC	Clathrin Heavy Chain	Protein Coding	48	GC17P059619	20.0585
FGF2	Fibroblast Growth Factor 2	Protein Coding	48	GC04P122826	20.0417
PLAU	Plasminogen Activator, Urokinase	Protein Coding	55	GC10P073909	19.9976
TOP2A	DNA Topoisomerase II Alpha	Protein Coding	54	GC17M040388	19.9613
PPM1D	Protein Phosphatase, Mg2+/Mn2+ Dependent 1D	Protein Coding	50	GC17P060600	19.9043
CTNND1	Catenin Delta 1	Protein Coding	48	GC11P058173	19.7704
DDR2	Discoidin Domain Receptor Tyrosine Kinase 2	Protein Coding	55	GC01P162631	19.7535
MIR16-1	MicroRNA 16-1	RNA Gene	22	GC13M050048	19.7164
MIR193B	MicroRNA 193b	RNA Gene	23	GC16P014307	19.6982
IL10	Interleukin 10	Protein Coding	50	GC01M206767	19.6676
CCKBR	Cholecystokinin B Receptor	Protein Coding	50	GC11P006259	19.6258
RSPO1	R-Spondin 1	Protein Coding	46	GC01M037612	19.6194
RAD54L	RAD54 Like	Protein Coding	48	GC01P046337	19.5643
PDGFRA	Platelet Derived Growth Factor Receptor Alpha	Protein Coding	56	GC04P054229	19.5561
GRP	Gastrin Releasing Peptide	Protein Coding	43	GC18P059220	19.4856
DLEC1	DLEC1 Cilia And Flagella Associated Protein	Protein Coding	38	GC03P038038	19.4453
SPP1	Secreted Phosphoprotein 1	Protein Coding	49	GC04P087975	19.4393
AXIN2	Axin 2	Protein Coding	50	GC17M065528	19.4372
GNAS	GNAS Complex Locus	Protein Coding	52	GC20P058839	19.4157
NFIB	Nuclear Factor I B	Protein Coding	45	GC09M014077	19.341
MUC2	Mucin 2, Oligomeric Mucus/Gel-Forming	Protein Coding	41	GC11P001074	19.3382
TERC	Telomerase RNA Component	RNA Gene	31	GC03M169765	19.3135
CCK	Cholecystokinin	Protein Coding	44	GC03M042274	19.2957
PRKN	Parkin RBR E3 Ubiquitin Protein Ligase	Protein Coding	47	GC06M161348	19.2471
MMP14	Matrix Metallopeptidase 14	Protein Coding	53	GC14P033595	19.2403
NFKBIA	NFKB Inhibitor Alpha	Protein Coding	52	GC14M035401	19.2252
KRT8	Keratin 8	Protein Coding	50	GC12M052897	19.2096
TLR2	Toll Like Receptor 2	Protein Coding	54	GC04P153684	19.1696
DNMT1	DNA Methyltransferase 1	Protein Coding	55	GC19M010133	19.1019
MIRLET7A1	MicroRNA Let-7a-1	RNA Gene	23	GC09P094175	19.0937
CYP1A1	Cytochrome P450 Family 1 Subfamily A Member 1	Protein Coding	50	GC15M074719	18.9585
MIR199A1	MicroRNA 199a-1	RNA Gene	21	GC19M010817	18.9405
NF1	Neurofibromin 1	Protein Coding	51	GC17P031094	18.9393
NOS2	Nitric Oxide Synthase 2	Protein Coding	51	GC17M027756	18.9384
KRT14	Keratin 14	Protein Coding	49	GC17M041582	18.926
ABCC1	ATP Binding Cassette Subfamily C Member 1	Protein Coding	52	GC16P015949	18.8403
VIM	Vimentin	Protein Coding	53	GC10P017227	18.8257
MGMT	O-6-Methylguanine-DNA Methyltransferase	Protein Coding	52	GC10P129467	18.8231
ALB	Albumin	Protein Coding	52	GC04P073397	18.8006
MIR9-1	MicroRNA 9-1	RNA Gene	22	GC01M156420	18.7664
BAP1	BRCA1 Associated Protein 1	Protein Coding	50	GC03M052401	18.7601
MAPK8	Mitogen-Activated Protein Kinase 8	Protein Coding	52	GC10P048306	18.7065
MEG3	Maternally Expressed 3	RNA Gene	28	GC14P110419	18.5756
MIR372	MicroRNA 372	RNA Gene	18	GC19P070436	18.5501
CLDN7	Claudin 7	Protein Coding	43	GC17M007259	18.5499
S100A8	S100 Calcium Binding Protein A8	Protein Coding	45	GC01M153391	18.5399
MTHFR	Methylenetetrahydrofolate Reductase	Protein Coding	50	GC01M011785	18.5269
MAPK3	Mitogen-Activated Protein Kinase 3	Protein Coding	51	GC16M037779	18.5108
SOX2	SRY-Box Transcription Factor 2	Protein Coding	47	GC03P181711	18.4935
TWIST1	Twist Family BHLH Transcription Factor 1	Protein Coding	47	GC07M019020	18.4361
RAD50	RAD50 Double Strand Break Repair Protein	Protein Coding	52	GC05P132556	18.4295
GAPLINC	Gastric Adenocarcinoma Associated, Positive CD44 Regulator, Long Intergenic Non-Coding RNA	RNA Gene	16	GC18P003467	18.4159
NDUFA13	NADH:Ubiquinone Oxidoreductase Subunit A13	Protein Coding	46	GC19P019515	18.4097
UCA1	Urothelial Cancer Associated 1	RNA Gene	25	GC19P015828	18.3483
HABP2	Hyaluronan Binding Protein 2	Protein Coding	48	GC10P113550	18.3397
RARB	Retinoic Acid Receptor Beta	Protein Coding	51	GC03P024689	18.3241
CDH3	Cadherin 3	Protein Coding	50	GC16P068637	18.2749
BRD4	Bromodomain Containing 4	Protein Coding	51	GC19M015236	18.2404
IL2	Interleukin 2	Protein Coding	51	GC04M122451	18.2279
CCNB1	Cyclin B1	Protein Coding	49	GC05P069167	18.2072
CIB1	Calcium And Integrin Binding 1	Protein Coding	43	GC15M090229	18.2028
RAF1	Raf-1 Proto-Oncogene, Serine/Threonine Kinase	Protein Coding	57	GC03M012583	18.2008
CDK2	Cyclin Dependent Kinase 2	Protein Coding	54	GC12P055966	18.1854
CCR6	C-C Motif Chemokine Receptor 6	Protein Coding	46	GC06P167111	18.1841
MIR331	MicroRNA 331	RNA Gene	22	GC12P095308	18.1679
GCG	Glucagon	Protein Coding	44	GC02M162142	18.1654
TIMP2	TIMP Metallopeptidase Inhibitor 2	Protein Coding	45	GC17M078852	18.157
PVT1	Pvt1 Oncogene	RNA Gene	27	GC08P127877	18.1345
MIR502	MicroRNA 502	RNA Gene	18	GC0XP050014	18.098
MME	Membrane Metalloendopeptidase	Protein Coding	53	GC03P155024	18.0812
CRNN	Cornulin	Protein Coding	38	GC01M152422	18.0718
SERPINB5	Serpin Family B Member 5	Protein Coding	45	GC18P063476	17.9986
MIR30A	MicroRNA 30a	RNA Gene	22	GC06M071403	17.9933
MIR16-2	MicroRNA 16-2	RNA Gene	20	GC03P160413	17.9633
CREBBP	CREB Binding Protein	Protein Coding	55	GC16M007712	17.9407
INS	Insulin	Protein Coding	50	GC11M002159	17.9241
GACAT2	Gastric Cancer Associated Transcript 2	RNA Gene	17	GC18M008695	17.8036
MCL1	MCL1 Apoptosis Regulator, BCL2 Family Member	Protein Coding	50	GC01M152371	17.7831
DAPK1	Death Associated Protein Kinase 1	Protein Coding	52	GC09P087497	17.7791
SOD2	Superoxide Dismutase 2	Protein Coding	51	GC06M159669	17.7323
CD34	CD34 Molecule	Protein Coding	48	GC01M207880	17.598
KDM4C	Lysine Demethylase 4C	Protein Coding	44	GC09P006720	17.5452
GCRG224	Gastric Cancer-Related Gene GCRG224	RNA Gene	6	GC11U900303	17.509
FLT4	Fms Related Receptor Tyrosine Kinase 4	Protein Coding	55	GC05M180614	17.5047
CALCA	Calcitonin Related Polypeptide Alpha	Protein Coding	48	GC11M014945	17.4866
MUC4	Mucin 4, Cell Surface Associated	Protein Coding	42	GC03M195746	17.4614
PDGFRB	Platelet Derived Growth Factor Receptor Beta	Protein Coding	56	GC05M150113	17.4522
EPHB2	EPH Receptor B2	Protein Coding	55	GC01P022710	17.4518
MAGEA1	MAGE Family Member A1	Protein Coding	38	GC0XP153179	17.4163
DIRC1	Disrupted In Renal Carcinoma 1	RNA Gene	27	GC02M188733	17.3841
MIR128-2	MicroRNA 128-2	RNA Gene	22	GC03P035750	17.3815
SDHA	Succinate Dehydrogenase Complex Flavoprotein Subunit A	Protein Coding	50	GC05P000208	17.3287
FANCM	FA Complementation Group M	Protein Coding	45	GC14P045135	17.303
CYP2A6	Cytochrome P450 Family 2 Subfamily A Member 6	Protein Coding	50	GC19M040843	17.2646
MIRLET7A3	MicroRNA Let-7a-3	RNA Gene	21	GC22P046112	17.2578
CDH2	Cadherin 2	Protein Coding	55	GC18M027950	17.2387
RUNX3	RUNX Family Transcription Factor 3	Protein Coding	46	GC01M024899	17.2241
GACAT3	Gastric Cancer Associated Transcript 3	RNA Gene	16	GC02P016050	17.2109
MIR149	MicroRNA 149	RNA Gene	25	GC02P240456	17.1962
BCAS4	Breast Carcinoma Amplified Sequence 4	Protein Coding	37	GC20P050794	17.1551
TG	Thyroglobulin	Protein Coding	47	GC08P132866	17.1086
TMC8	Transmembrane Channel Like 8	Protein Coding	43	GC17P078130	17.0832
THBS1	Thrombospondin 1	Protein Coding	48	GC15P039581	17.0294
BSG	Basigin (Ok Blood Group)	Protein Coding	47	GC19P000571	17.029
BUB1	BUB1 Mitotic Checkpoint Serine/Threonine Kinase	Protein Coding	51	GC02M110637	17.0233
CLDN18	Claudin 18	Protein Coding	46	GC03P137998	17.0008
LZTS1	Leucine Zipper Tumor Suppressor 1	Protein Coding	41	GC08M020246	17.0007
TIMP1	TIMP Metallopeptidase Inhibitor 1	Protein Coding	47	GC0XP047647	16.9928
MIR139	MicroRNA 139	RNA Gene	23	GC11M072615	16.9538
MIR181A2	MicroRNA 181a-2	RNA Gene	22	GC09P124692	16.9453
MIR152	MicroRNA 152	RNA Gene	23	GC17M048037	16.9121
GPC3	Glypican 3	Protein Coding	49	GC0XM133535	16.9054
SRGAP1	SLIT-ROBO Rho GTPase Activating Protein 1	Protein Coding	46	GC12P063844	16.8788
SERPINA3	Serpin Family A Member 3	Protein Coding	45	GC14P094612	16.8768
ICOSLG	Inducible T Cell Costimulator Ligand	Protein Coding	43	GC21M044222	16.8575
NEAT1	Nuclear Paraspeckle Assembly Transcript 1	RNA Gene	27	GC11P070383	16.8401
DICER1	Dicer 1, Ribonuclease III	Protein Coding	51	GC14M095086	16.8376
E2F1	E2F Transcription Factor 1	Protein Coding	45	GC20M033675	16.8068
CAV1	Caveolin 1	Protein Coding	51	GC07P116524	16.7589
MIR181C	MicroRNA 181c	RNA Gene	22	GC19P014583	16.7295
HSP90AA1	Heat Shock Protein 90 Alpha Family Class A Member 1	Protein Coding	52	GC14M102080	16.7273
PIK3R1	Phosphoinositide-3-Kinase Regulatory Subunit 1	Protein Coding	53	GC05P068215	16.7191
MYB	MYB Proto-Oncogene, Transcription Factor	Protein Coding	51	GC06P135180	16.6839
IFI27	Interferon Alpha Inducible Protein 27	Protein Coding	40	GC14P094104	16.5932
MIR128-1	MicroRNA 128-1	RNA Gene	20	GC02P135665	16.5853
ABCG2	ATP Binding Cassette Subfamily G Member 2 (Junior Blood Group)	Protein Coding	52	GC04M088090	16.5808
YAP1	Yes1 Associated Transcriptional Regulator	Protein Coding	50	GC11P102110	16.569
MIR142	MicroRNA 142	RNA Gene	23	GC17M058331	16.5669
GAPDH	Glyceraldehyde-3-Phosphate Dehydrogenase	Protein Coding	52	GC12P022355	16.5663
U2AF1	U2 Small Nuclear RNA Auxiliary Factor 1	Protein Coding	47	GC21M043092	16.5459
PDCD1	Programmed Cell Death 1	Protein Coding	50	GC02M241849	16.527
MAGEA3	MAGE Family Member A3	Protein Coding	39	GC0XP152698	16.5258
TNFSF10	TNF Superfamily Member 10	Protein Coding	47	GC03M172505	16.5223
HOXB13	Homeobox B13	Protein Coding	44	GC17M050359	16.5148
MIR10A	MicroRNA 10a	RNA Gene	23	GC17M048579	16.4834
ELAVL1	ELAV Like RNA Binding Protein 1	Protein Coding	43	GC19M007958	16.4675
ITGB1	Integrin Subunit Beta 1	Protein Coding	53	GC10M033391	16.4645
CCNA2	Cyclin A2	Protein Coding	48	GC04M121816	16.4427
PRKCD	Protein Kinase C Delta	Protein Coding	55	GC03P053156	16.4411
HEIH	Hepatocellular Carcinoma Up-Regulated EZH2-Associated Long Non-Coding RNA	RNA Gene	18	GC05M181850	16.4349
MIR30D	MicroRNA 30d	RNA Gene	21	GC08M134804	16.4299
TLR4	Toll Like Receptor 4	Protein Coding	54	GC09P117704	16.4182
CFLAR	CASP8 And FADD Like Apoptosis Regulator	Protein Coding	46	GC02P201117	16.4083
VEGFD	Vascular Endothelial Growth Factor D	Protein Coding	42	GC0XM015345	16.4047
H2AC18	H2A Clustered Histone 18	Protein Coding	30	GC01M152332	16.3872
CTSD	Cathepsin D	Protein Coding	55	GC11M001752	16.3665
TUG1	Taurine Up-Regulated 1	Protein Coding	25	GC22P030969	16.364
MUC16	Mucin 16, Cell Surface Associated	Protein Coding	40	GC19M008848	16.3526
TGFBR1	Transforming Growth Factor Beta Receptor 1	Protein Coding	56	GC09P099104	16.2935
ETV6	ETS Variant Transcription Factor 6	Protein Coding	48	GC12P011649	16.2707
ODC1	Ornithine Decarboxylase 1	Protein Coding	51	GC02M010432	16.2651
CYCS	Cytochrome C, Somatic	Protein Coding	51	GC07M025118	16.2511
MIR196A1	MicroRNA 196a-1	RNA Gene	23	GC17M048632	16.2291
RNASEL	Ribonuclease L	Protein Coding	46	GC01M182573	16.1972
MIR26A1	MicroRNA 26a-1	RNA Gene	23	GC03P037969	16.1572
LGALS3	Galectin 3	Protein Coding	48	GC14P055124	16.1252
CLDN4	Claudin 4	Protein Coding	42	GC07P073799	16.1172
MIR101-1	MicroRNA 101-1	RNA Gene	22	GC01M065058	16.1164
DLC1	DLC1 Rho GTPase Activating Protein	Protein Coding	47	GC08M013083	16.1155
MXI1	MAX Interactor 1, Dimerization Protein	Protein Coding	43	GC10P110208	16.0992
WRAP53	WD Repeat Containing Antisense To TP53	Protein Coding	43	GC17P011466	16.0728
DPYD	Dihydropyrimidine Dehydrogenase	Protein Coding	55	GC01M097015	16.0673
CDKN1C	Cyclin Dependent Kinase Inhibitor 1C	Protein Coding	47	GC11M004031	16.0397
EPHA2	EPH Receptor A2	Protein Coding	56	GC01M016124	16.0376
SOX4	SRY-Box Transcription Factor 4	Protein Coding	45	GC06P021593	16.0297
CTLA4	Cytotoxic T-Lymphocyte Associated Protein 4	Protein Coding	52	GC02P203854	16.0142
DNMT3B	DNA Methyltransferase 3 Beta	Protein Coding	53	GC20P032762	15.9733
PRKACA	Protein Kinase CAMP-Activated Catalytic Subunit Alpha	Protein Coding	54	GC19M014559	15.9667
SKP2	S-Phase Kinase Associated Protein 2	Protein Coding	46	GC05P036151	15.9583
BUB1B	BUB1 Mitotic Checkpoint Serine/Threonine Kinase B	Protein Coding	52	GC15P040161	15.9391
RAC1	Rac Family Small GTPase 1	Protein Coding	51	GC07P006377	15.9346
TIMP3	TIMP Metallopeptidase Inhibitor 3	Protein Coding	46	GC22P041082	15.9198
GACAT1	Gastric Cancer Associated Transcript 1	RNA Gene	13	GC02P107754	15.918
MSMB	Microseminoprotein Beta	Protein Coding	43	GC10M046033	15.8725
ENG	Endoglin	Protein Coding	51	GC09M127815	15.8503
B2M	Beta-2-Microglobulin	Protein Coding	52	GC15P044711	15.8448
JAG1	Jagged Canonical Notch Ligand 1	Protein Coding	54	GC20M010637	15.8113
FANCE	FA Complementation Group E	Protein Coding	44	GC06P087883	15.8096
AREG	Amphiregulin	Protein Coding	46	GC04P074445	15.8082
NLRP1	NLR Family Pyrin Domain Containing 1	Protein Coding	45	GC17M005499	15.7831
SCT	Secretin	Protein Coding	38	GC11M000626	15.7796
SOX9	SRY-Box Transcription Factor 9	Protein Coding	48	GC17P072121	15.7731
MIR144	MicroRNA 144	RNA Gene	21	GC17M044993	15.7608
CDK1	Cyclin Dependent Kinase 1	Protein Coding	50	GC10P060772	15.7512
PTK2	Protein Tyrosine Kinase 2	Protein Coding	50	GC08M140657	15.7347
MIR342	MicroRNA 342	RNA Gene	22	GC14P100109	15.6954
GLI1	GLI Family Zinc Finger 1	Protein Coding	50	GC12P057462	15.6864
MIR29B1	MicroRNA 29b-1	RNA Gene	23	GC07M130877	15.6341
GAS5	Growth Arrest Specific 5	RNA Gene	26	GC01M173947	15.61
KEAP1	Kelch Like ECH Associated Protein 1	Protein Coding	51	GC19M010486	15.6048
TRIM24	Tripartite Motif Containing 24	Protein Coding	47	GC07P138460	15.5768
CDKN2B-AS1	CDKN2B Antisense RNA 1	RNA Gene	25	GC09P021994	15.5767
MAPK14	Mitogen-Activated Protein Kinase 14	Protein Coding	54	GC06P087896	15.5696
IL7	Interleukin 7	Protein Coding	47	GC08M078689	15.5259
IFNA1	Interferon Alpha 1	Protein Coding	43	GC09P021601	15.5223
ANXA5	Annexin A5	Protein Coding	48	GC04M121667	15.5194
HPSE	Heparanase	Protein Coding	47	GC04M083292	15.5082
ATRX	ATRX Chromatin Remodeler	Protein Coding	49	GC0XM077504	15.5034
HNF4A	Hepatocyte Nuclear Factor 4 Alpha	Protein Coding	52	GC20P044355	15.4993
GREM1	Gremlin 1, DAN Family BMP Antagonist	Protein Coding	45	GC15P044385	15.4604
STAT1	Signal Transducer And Activator Of Transcription 1	Protein Coding	55	GC02M190908	15.4511
ZEB1	Zinc Finger E-Box Binding Homeobox 1	Protein Coding	51	GC10P031318	15.4345
FLT1	Fms Related Receptor Tyrosine Kinase 1	Protein Coding	54	GC13M028300	15.4161
KLF4	KLF Transcription Factor 4	Protein Coding	48	GC09M107484	15.4093
TNFRSF10A	TNF Receptor Superfamily Member 10a	Protein Coding	47	GC08M023190	15.4036
CCAT1	Colon Cancer Associated Transcript 1	RNA Gene	16	GC08M127207	15.4023
CDH17	Cadherin 17	Protein Coding	45	GC08M094127	15.3774
MMP3	Matrix Metallopeptidase 3	Protein Coding	53	GC11M102835	15.3359
PIP	Prolactin Induced Protein	Protein Coding	41	GC07P143132	15.3308
CD82	CD82 Molecule	Protein Coding	45	GC11P044586	15.3158
FRGCA	FOXM1-Regulated, Gastric Cancer Associated	RNA Gene	15	GC21M043141	15.3022
NQO2	N-Ribosyldihydronicotinamide:Quinone Reductase 2	Protein Coding	47	GC06P003291	15.2872
MIR206	MicroRNA 206	RNA Gene	22	GC06P052144	15.2841
MIR338	MicroRNA 338	RNA Gene	20	GC17M081126	15.2733
NCAM1	Neural Cell Adhesion Molecule 1	Protein Coding	51	GC11P112961	15.2578
FN1	Fibronectin 1	Protein Coding	52	GC02M215360	15.2451
MAP3K8	Mitogen-Activated Protein Kinase Kinase Kinase 8	Protein Coding	49	GC10P030520	15.2375
SMAD3	SMAD Family Member 3	Protein Coding	54	GC15P067063	15.2275
SP1	Sp1 Transcription Factor	Protein Coding	49	GC12P053380	15.2264
AXL	AXL Receptor Tyrosine Kinase	Protein Coding	55	GC19P041219	15.1582
RELA	RELA Proto-Oncogene, NF-KB Subunit	Protein Coding	54	GC11M065653	15.1545
CEACAM3	CEA Cell Adhesion Molecule 3	Protein Coding	45	GC19P041796	15.1391
ABL1	ABL Proto-Oncogene 1, Non-Receptor Tyrosine Kinase	Protein Coding	55	GC09P130713	15.1032
CTSB	Cathepsin B	Protein Coding	55	GC08M011842	15.0987
POU5F1	POU Class 5 Homeobox 1	Protein Coding	47	GC06M069160	15.0703
MIR423	MicroRNA 423	RNA Gene	21	GC17P030117	15.0513
IL4	Interleukin 4	Protein Coding	49	GC05P132673	15.0503
HBEGF	Heparin Binding EGF Like Growth Factor	Protein Coding	45	GC05M140332	15.0103
CSNK2A1	Casein Kinase 2 Alpha 1	Protein Coding	53	GC20M000472	15.0083
ALDH2	Aldehyde Dehydrogenase 2 Family Member	Protein Coding	53	GC12P111766	14.9874
LMNA	Lamin A/C	Protein Coding	51	GC01P156082	14.9815
MTDH	Metadherin	Protein Coding	43	GC08P097644	14.9798
ETS1	ETS Proto-Oncogene 1, Transcription Factor	Protein Coding	50	GC11M128458	14.9671
MAD1L1	Mitotic Arrest Deficient 1 Like 1	Protein Coding	48	GC07M001815	14.9666
S100A4	S100 Calcium Binding Protein A4	Protein Coding	48	GC01M153543	14.9519
TFF3	Trefoil Factor 3	Protein Coding	43	GC21M042311	14.9451
HFE	Homeostatic Iron Regulator	Protein Coding	48	GC06P026087	14.9292
SFRP1	Secreted Frizzled Related Protein 1	Protein Coding	47	GC08M041262	14.9098
MIR324	MicroRNA 324	RNA Gene	22	GC17M007223	14.9014
TMEM127	Transmembrane Protein 127	Protein Coding	41	GC02M096248	14.8735
PARP1	Poly(ADP-Ribose) Polymerase 1	Protein Coding	53	GC01M226360	14.835
MALT1	MALT1 Paracaspase	Protein Coding	50	GC18P058671	14.831
GATA3	GATA Binding Protein 3	Protein Coding	51	GC10P008045	14.8033
PLK1	Polo Like Kinase 1	Protein Coding	53	GC16P024406	14.777
JAK2	Janus Kinase 2	Protein Coding	55	GC09P004985	14.7407
CYLD	CYLD Lysine 63 Deubiquitinase	Protein Coding	51	GC16P050742	14.7086
CCR7	C-C Motif Chemokine Receptor 7	Protein Coding	47	GC17M049365	14.7071
FOXP1	Forkhead Box P1	Protein Coding	46	GC03M070926	14.6954
HMMR	Hyaluronan Mediated Motility Receptor	Protein Coding	45	GC05P163480	14.6317
CCNE1	Cyclin E1	Protein Coding	51	GC19P029811	14.6254
ELAC2	ElaC Ribonuclease Z 2	Protein Coding	45	GC17M012991	14.5998
GSTT1	Glutathione S-Transferase Theta 1	Protein Coding	34	GC22Mi00270	14.594
HSPB1	Heat Shock Protein Family B (Small) Member 1	Protein Coding	54	GC07P076302	14.5929
CD40	CD40 Molecule	Protein Coding	52	GC20P046118	14.5895
MAX	MYC Associated Factor X	Protein Coding	49	GC14M065113	14.5654
MIR320A	MicroRNA 320a	RNA Gene	23	GC08M022271	14.5644
ICAM1	Intercellular Adhesion Molecule 1	Protein Coding	53	GC19P010638	14.554
PTCSC3	Papillary Thyroid Carcinoma Susceptibility Candidate 3	RNA Gene	18	GC14M036184	14.5527
EIF4EBP1	Eukaryotic Translation Initiation Factor 4E Binding Protein 1	Protein Coding	49	GC08P038535	14.5396
ITGA6	Integrin Subunit Alpha 6	Protein Coding	52	GC02P172427	14.523
DAXX	Death Domain Associated Protein	Protein Coding	45	GC06M033318	14.5214
NTHL1	Nth Like DNA Glycosylase 1	Protein Coding	47	GC16M007547	14.519
PTGS1	Prostaglandin-Endoperoxide Synthase 1	Protein Coding	49	GC09P122370	14.5115
PRKAR1A	Protein Kinase CAMP-Dependent Type I Regulatory Subunit Alpha	Protein Coding	53	GC17P069148	14.4997
TPX2	TPX2 Microtubule Nucleation Factor	Protein Coding	44	GC20P031739	14.4955
KCNQ1OT1	KCNQ1 Opposite Strand/Antisense Transcript 1	RNA Gene	29	GC11M004028	14.4732
MIR9-3	MicroRNA 9-3	RNA Gene	21	GC15P089368	14.458
CTTN	Cortactin	Protein Coding	45	GC11P070398	14.428
HDAC1	Histone Deacetylase 1	Protein Coding	52	GC01P032292	14.4148
CDK6	Cyclin Dependent Kinase 6	Protein Coding	55	GC07M092604	14.4121
GKN2	Gastrokine 2	Protein Coding	37	GC02M068945	14.4081
TCF4	Transcription Factor 4	Protein Coding	50	GC18M055222	14.2208
TOP1	DNA Topoisomerase I	Protein Coding	51	GC20P041028	14.2156
DNAJB1	DnaJ Heat Shock Protein Family (Hsp40) Member B1	Protein Coding	46	GC19M014514	14.2145
CD8A	CD8a Molecule	Protein Coding	50	GC02M086784	14.2009
RBBP8	RB Binding Protein 8, Endonuclease	Protein Coding	45	GC18P022798	14.1873
GCAWKR	Gastric Cancer Associated WDR5 And KAT2A Binding LncRNA	RNA Gene	12	GC15P121273	14.1801
MIR133A1	MicroRNA 133a-1	RNA Gene	19	GC18M025563	14.1792
LAMC2	Laminin Subunit Gamma 2	Protein Coding	50	GC01P183186	14.1592
CYTOR	Cytoskeleton Regulator RNA	RNA Gene	23	GC02P088180	14.1197
XPC	XPC Complex Subunit, DNA Damage Recognition And Repair Factor	Protein Coding	48	GC03M021331	14.0898
ABRAXAS1	Abraxas 1, BRCA1 A Complex Subunit	Protein Coding	39	GC04M083460	14.0697
MIR424	MicroRNA 424	RNA Gene	21	GC0XM134697	14.0363
ACTB	Actin Beta	Protein Coding	52	GC07M005527	14.0316
CRP	C-Reactive Protein	Protein Coding	48	GC01M159728	14.0301
XIST	X Inactive Specific Transcript	RNA Gene	25	GC0XM073820	14.0192
ZEB2	Zinc Finger E-Box Binding Homeobox 2	Protein Coding	50	GC02M144384	14.0007
FOXP3	Forkhead Box P3	Protein Coding	49	GC0XM049250	13.9806
CXCL12	C-X-C Motif Chemokine Ligand 12	Protein Coding	46	GC10M044370	13.971
MIR30B	MicroRNA 30b	RNA Gene	23	GC08M134800	13.9561
MIR129-1	MicroRNA 129-1	RNA Gene	20	GC07P128207	13.9554
BMP6	Bone Morphogenetic Protein 6	Protein Coding	46	GC06P007726	13.8868
SMAD7	SMAD Family Member 7	Protein Coding	48	GC18M048919	13.8837
CCND2	Cyclin D2	Protein Coding	51	GC12P022312	13.8562
MIR590	MicroRNA 590	RNA Gene	22	GC07P074191	13.8424
CYP19A1	Cytochrome P450 Family 19 Subfamily A Member 1	Protein Coding	51	GC15M051208	13.8354
KLLN	Killin, P53 Regulated DNA Replication Inhibitor	Protein Coding	32	GC10M087883	13.8246
PLA2G2A	Phospholipase A2 Group IIA	Protein Coding	50	GC01M019975	13.7719
SMARCE1	SWI/SNF Related, Matrix Associated, Actin Dependent Regulator Of Chromatin, Subfamily E, Member 1	Protein Coding	47	GC17M040624	13.7566
CCAT2	Colon Cancer Associated Transcript 2	RNA Gene	16	GC08P127400	13.7484
KLK3	Kallikrein Related Peptidase 3	Protein Coding	50	GC19P050854	13.7042
CD24	CD24 Molecule	Protein Coding	40	GC06M106969	13.6367
CEACAM1	CEA Cell Adhesion Molecule 1	Protein Coding	48	GC19M042507	13.5851
TCF7L2	Transcription Factor 7 Like 2	Protein Coding	49	GC10P112950	13.5838
SERPINA1	Serpin Family A Member 1	Protein Coding	51	GC14M094376	13.538
CD4	CD4 Molecule	Protein Coding	52	GC12P006786	13.5032
MIR138-1	MicroRNA 138-1	RNA Gene	22	GC03P044115	13.5014
BLM	BLM RecQ Like Helicase	Protein Coding	51	GC15P090717	13.479
TMC6	Transmembrane Channel Like 6	Protein Coding	45	GC17M078110	13.432
LOC111589215	BRCA1 Promoter Region	Biological Region	4	GC17P059496	13.4212
MIR24-1	MicroRNA 24-1	RNA Gene	21	GC09P095086	13.3859
GKN1	Gastrokine 1	Protein Coding	41	GC02P068974	13.3854
PAK1	P21 (RAC1) Activated Kinase 1	Protein Coding	52	GC11M097499	13.3483
FANCD2	FA Complementation Group D2	Protein Coding	48	GC03P010026	13.3451
IQGAP1	IQ Motif Containing GTPase Activating Protein 1	Protein Coding	46	GC15P090388	13.3405
SPRY4-IT1	SPRY4 Intronic Transcript 1	RNA Gene	16	GC05M142318	13.3297
HOTTIP	HOXA Distal Transcript Antisense RNA	RNA Gene	24	GC07P027198	13.2873
IDH1	Isocitrate Dehydrogenase (NADP(+)) 1	Protein Coding	56	GC02M208236	13.2533
FADD	Fas Associated Via Death Domain	Protein Coding	48	GC11P070203	13.2452
HERC2	HECT And RLD Domain Containing E3 Ubiquitin Protein Ligase 2	Protein Coding	48	GC15M028111	13.2329
IDH2	Isocitrate Dehydrogenase (NADP(+)) 2	Protein Coding	55	GC15M090083	13.133
VDR	Vitamin D Receptor	Protein Coding	52	GC12M047841	13.1267
KITLG	KIT Ligand	Protein Coding	48	GC12M088492	13.1207
PROM1	Prominin 1	Protein Coding	48	GC04M015965	13.1023
TTN	Titin	Protein Coding	50	GC02M178525	13.0827
MIR574	MicroRNA 574	RNA Gene	22	GC04P038962	13.0761
IGF1	Insulin Like Growth Factor 1	Protein Coding	50	GC12M102395	13.0516
PKM	Pyruvate Kinase M1/2	Protein Coding	51	GC15M072199	13.0502
HMGB1	High Mobility Group Box 1	Protein Coding	49	GC13M030456	13.0331
MIR455	MicroRNA 455	RNA Gene	21	GC09P114209	13.0221
LINC00261	Long Intergenic Non-Protein Coding RNA 261	RNA Gene	22	GC20M022547	13.0208
MMP11	Matrix Metallopeptidase 11	Protein Coding	47	GC22P023768	13.0131
MIR370	MicroRNA 370	RNA Gene	23	GC14P110111	12.9446
FOS	Fos Proto-Oncogene, AP-1 Transcription Factor Subunit	Protein Coding	52	GC14P075278	12.9352
MIR361	MicroRNA 361	RNA Gene	19	GC0XM085903	12.9234
HLA-A	Major Histocompatibility Complex, Class I, A	Protein Coding	48	GC06P087685	12.9063
LDHA	Lactate Dehydrogenase A	Protein Coding	54	GC11P018394	12.9037
ANXA2	Annexin A2	Protein Coding	51	GC15M060347	12.8882
SART1	Spliceosome Associated Factor 1, Recruiter Of U4/U6.U5 Tri-SnRNP	Protein Coding	43	GC11P070475	12.8878
MIR330	MicroRNA 330	RNA Gene	22	GC19M068020	12.8821
ZFAS1	ZNFX1 Antisense RNA 1	RNA Gene	22	GC20P049276	12.8233
ARID1B	AT-Rich Interaction Domain 1B	Protein Coding	47	GC06P156777	12.8149
SNAI2	Snail Family Transcriptional Repressor 2	Protein Coding	48	GC08M048917	12.8093
CASC9	Cancer Susceptibility 9	RNA Gene	17	GC08M075132	12.7929
MIR186	MicroRNA 186	RNA Gene	22	GC01M071067	12.7736
MIR490	MicroRNA 490	RNA Gene	19	GC07P136903	12.703
MSLN	Mesothelin	Protein Coding	45	GC16P012620	12.6958
MIRLET7I	MicroRNA Let-7i	RNA Gene	23	GC12P062613	12.6954
IFNA2	Interferon Alpha 2	Protein Coding	45	GC09M021384	12.6863
URGCP	Upregulator Of Cell Proliferation	Protein Coding	37	GC07M043876	12.6826
CEACAM6	CEA Cell Adhesion Molecule 6	Protein Coding	44	GC19P041750	12.6824
EZR	Ezrin	Protein Coding	48	GC06M158765	12.677
FZD7	Frizzled Class Receptor 7	Protein Coding	48	GC02P202034	12.6585
CASC2	Cancer Susceptibility 2	RNA Gene	27	GC10P118046	12.6433
CRNDE	Colorectal Neoplasia Differentially Expressed	RNA Gene	23	GC16M054845	12.6311
AKT2	AKT Serine/Threonine Kinase 2	Protein Coding	56	GC19M040230	12.6269
ITGB4	Integrin Subunit Beta 4	Protein Coding	52	GC17P075721	12.6124
LBR	Lamin B Receptor	Protein Coding	50	GC01M225401	12.5823
H4C16	H4 Histone 16	Protein Coding	39	GC12M022008	12.5673
BMP2	Bone Morphogenetic Protein 2	Protein Coding	51	GC20P006767	12.5396
JAK3	Janus Kinase 3	Protein Coding	54	GC19M017824	12.5306
ANGPT2	Angiopoietin 2	Protein Coding	50	GC08M006499	12.4989
RNF43	Ring Finger Protein 43	Protein Coding	44	GC17M058352	12.4589
ST14	ST14 Transmembrane Serine Protease Matriptase	Protein Coding	51	GC11P130159	12.4438
MIR125B1	MicroRNA 125b-1	RNA Gene	23	GC11M122100	12.436
MIR92A1	MicroRNA 92a-1	RNA Gene	22	GC13P091570	12.4337
PCAT1	Prostate Cancer Associated Transcript 1	RNA Gene	19	GC08P126553	12.4331
DNMT3A	DNA Methyltransferase 3 Alpha	Protein Coding	54	GC02M025228	12.432
PTHLH	Parathyroid Hormone Like Hormone	Protein Coding	48	GC12M027959	12.4165
ERC1	ELKS/RAB6-Interacting/CAST Family Member 1	Protein Coding	44	GC12P000972	12.4046
CYP2E1	Cytochrome P450 Family 2 Subfamily E Member 1	Protein Coding	47	GC10P133520	12.3786
MIR124-1	MicroRNA 124-1	RNA Gene	21	GC08M009903	12.3662
FGFR4	Fibroblast Growth Factor Receptor 4	Protein Coding	55	GC05P177086	12.3584
PGA3	Pepsinogen A3	Protein Coding	35	GC11P061203	12.3319
SDC1	Syndecan 1	Protein Coding	45	GC02M020200	12.3316
MIR661	MicroRNA 661	RNA Gene	19	GC08M143945	12.3308
RECK	Reversion Inducing Cysteine Rich Protein With Kazal Motifs	Protein Coding	43	GC09P036036	12.3268
SNHG1	Small Nucleolar RNA Host Gene 1	RNA Gene	22	GC11M096939	12.3164
LINC-ROR	Long Intergenic Non-Protein Coding RNA, Regulator Of Reprogramming	RNA Gene	18	GC18M057054	12.3135
FOXM1	Forkhead Box M1	Protein Coding	46	GC12M002857	12.2896
S100A1	S100 Calcium Binding Protein A1	Protein Coding	43	GC01P153627	12.2835
CLDN3	Claudin 3	Protein Coding	43	GC07M073768	12.2827
MAP3K1	Mitogen-Activated Protein Kinase Kinase Kinase 1	Protein Coding	52	GC05P056815	12.2707
LINC00673	Long Intergenic Non-Protein Coding RNA 673	RNA Gene	18	GC17M072290	12.2441
GSK3B	Glycogen Synthase Kinase 3 Beta	Protein Coding	52	GC03M119821	12.2361
PYY	Peptide YY	Protein Coding	45	GC17M043952	12.2345
UMPS	Uridine Monophosphate Synthetase	Protein Coding	50	GC03P124730	12.2024
PIK3CG	Phosphatidylinositol-4,5-Bisphosphate 3-Kinase Catalytic Subunit Gamma	Protein Coding	50	GC07P106865	12.2013
RECQL4	RecQ Like Helicase 4	Protein Coding	43	GC08M145505	12.1952
MIR99A	MicroRNA 99a	RNA Gene	23	GC21P016539	12.1887
CTAG1B	Cancer/Testis Antigen 1B	Protein Coding	31	GC0XM154617	12.1808
F2	Coagulation Factor II, Thrombin	Protein Coding	52	GC11P046720	12.1761
CSF3	Colony Stimulating Factor 3	Protein Coding	45	GC17P040015	12.174
HNF1A-AS1	HNF1A Antisense RNA 1	RNA Gene	20	GC12M122350	12.1454
XIAP	X-Linked Inhibitor Of Apoptosis	Protein Coding	54	GC0XP123859	12.1407
ERBB4	Erb-B2 Receptor Tyrosine Kinase 4	Protein Coding	57	GC02M211375	12.1295
IGFBP3	Insulin Like Growth Factor Binding Protein 3	Protein Coding	50	GC07M045912	12.1181
PSG2	Pregnancy Specific Beta-1-Glycoprotein 2	Protein Coding	36	GC19M043064	12.0861
DDB2	Damage Specific DNA Binding Protein 2	Protein Coding	48	GC11P047237	12.083
SERPINE1	Serpin Family E Member 1	Protein Coding	52	GC07P101127	12.0736
AMACR	Alpha-Methylacyl-CoA Racemase	Protein Coding	47	GC05M033986	12.0678
CEACAM7	CEA Cell Adhesion Molecule 7	Protein Coding	40	GC19M041673	12.0599
IL2RA	Interleukin 2 Receptor Subunit Alpha	Protein Coding	54	GC10M006010	12.0533
CD9	CD9 Molecule	Protein Coding	46	GC12P022327	12.0496
PICSAR	P38 Inhibited Cutaneous Squamous Cell Carcinoma Associated LincRNA	RNA Gene	20	GC21M051060	12.0256
PPP2R1A	Protein Phosphatase 2 Scaffold Subunit Aalpha	Protein Coding	50	GC19P070335	12.016
MAP2K2	Mitogen-Activated Protein Kinase Kinase 2	Protein Coding	56	GC19M004090	12.0102
MUC3A	Mucin 3A, Cell Surface Associated	Protein Coding	37	GC07P100949	12.0073
PDCD4	Programmed Cell Death 4	Protein Coding	45	GC10P110871	12.0003
MC1R	Melanocortin 1 Receptor	Protein Coding	50	GC16P089912	11.9931
CXCR2	C-X-C Motif Chemokine Receptor 2	Protein Coding	52	GC02P218125	11.9846
BID	BH3 Interacting Domain Death Agonist	Protein Coding	47	GC22M017734	11.9749
VIP	Vasoactive Intestinal Peptide	Protein Coding	47	GC06P152750	11.9522
NQO1	NAD(P)H Quinone Dehydrogenase 1	Protein Coding	50	GC16M069706	11.9466
CSF2	Colony Stimulating Factor 2	Protein Coding	46	GC05P132073	11.9298
SERPINB3	Serpin Family B Member 3	Protein Coding	43	GC18M063655	11.9124
SEC23B	SEC23 Homolog B, COPII Coat Complex Component	Protein Coding	45	GC20P018507	11.9114
PTPRJ	Protein Tyrosine Phosphatase Receptor Type J	Protein Coding	51	GC11P048002	11.9084
MMP13	Matrix Metallopeptidase 13	Protein Coding	54	GC11M102942	11.9016
XRCC2	X-Ray Repair Cross Complementing 2	Protein Coding	43	GC07M152644	11.8983
NAPSA	Napsin A Aspartic Peptidase	Protein Coding	43	GC19M068247	11.8795
SHH	Sonic Hedgehog Signaling Molecule	Protein Coding	54	GC07M155799	11.855
WNT5A	Wnt Family Member 5A	Protein Coding	52	GC03M055465	11.8538
GDF15	Growth Differentiation Factor 15	Protein Coding	45	GC19P069333	11.8509
AFAP1-AS1	AFAP1 Antisense RNA 1	RNA Gene	20	GC04P007756	11.8422
RHEB	Ras Homolog, MTORC1 Binding	Protein Coding	51	GC07M151466	11.8298
TACC1	Transforming Acidic Coiled-Coil Containing Protein 1	Protein Coding	43	GC08P038728	11.82
WT1	WT1 Transcription Factor	Protein Coding	51	GC11M032365	11.8169
HSPA4	Heat Shock Protein Family A (Hsp70) Member 4	Protein Coding	45	GC05P133051	11.7913
ARID2	AT-Rich Interaction Domain 2	Protein Coding	43	GC12P045729	11.776
DDR1	Discoidin Domain Receptor Tyrosine Kinase 1	Protein Coding	50	GC06P087709	11.7671
MIR582	MicroRNA 582	RNA Gene	22	GC05M059703	11.7227
BMI1	BMI1 Proto-Oncogene, Polycomb Ring Finger	Protein Coding	45	GC10P022326	11.7208
NTS	Neurotensin	Protein Coding	43	GC12P085876	11.6823
MIR103A1	MicroRNA 103a-1	RNA Gene	19	GC05M168560	11.6749
RABL3	RAB, Member Of RAS Oncogene Family Like 3	Protein Coding	37	GC03M120686	11.6624
PGA5	Pepsinogen A5	Protein Coding	37	GC11P061241	11.6526
CDR1-AS	CDR1 Antisense RNA	RNA Gene	8	GC0XU902169	11.6464
DANCR	Differentiation Antagonizing Non-Protein Coding RNA	RNA Gene	25	GC04P052712	11.6404
BAD	BCL2 Associated Agonist Of Cell Death	Protein Coding	47	GC11M096993	11.6305
GRB7	Growth Factor Receptor Bound Protein 7	Protein Coding	45	GC17P058462	11.6305
MIR375	MicroRNA 375	RNA Gene	23	GC02M219001	11.621
MIR211	MicroRNA 211	RNA Gene	23	GC15M031065	11.6174
COL7A1	Collagen Type VII Alpha 1 Chain	Protein Coding	47	GC03M048564	11.5969
PGA4	Pepsinogen A4	Protein Coding	33	GC11P061222	11.5844
S100A6	S100 Calcium Binding Protein A6	Protein Coding	44	GC01M153565	11.5831
MIR27B	MicroRNA 27b	RNA Gene	22	GC09P095097	11.5815
MIR532	MicroRNA 532	RNA Gene	19	GC0XP050993	11.5691
EPAS1	Endothelial PAS Domain Protein 1	Protein Coding	52	GC02P046293	11.5643
NAT2	N-Acetyltransferase 2	Protein Coding	43	GC08P018391	11.5641
FGF7	Fibroblast Growth Factor 7	Protein Coding	46	GC15P049423	11.5544
XPA	XPA, DNA Damage Recognition And Repair Factor	Protein Coding	47	GC09M097654	11.5475
GAS8-AS1	GAS8 Antisense RNA 1	RNA Gene	25	GC16M090028	11.5452
SMARCA2	SWI/SNF Related, Matrix Associated, Actin Dependent Regulator Of Chromatin, Subfamily A, Member 2	Protein Coding	52	GC09P001980	11.5228
IL17A	Interleukin 17A	Protein Coding	47	GC06P052186	11.5211
HLA-G	Major Histocompatibility Complex, Class I, G	Protein Coding	46	GC06P087672	11.4855
RARA	Retinoic Acid Receptor Alpha	Protein Coding	52	GC17P040309	11.4821
PTPN12	Protein Tyrosine Phosphatase Non-Receptor Type 12	Protein Coding	51	GC07P077537	11.4819
CRTC1	CREB Regulated Transcription Coactivator 1	Protein Coding	44	GC19P069338	11.4815
EIF4E	Eukaryotic Translation Initiation Factor 4E	Protein Coding	52	GC04M098879	11.4542
CCL2	C-C Motif Chemokine Ligand 2	Protein Coding	51	GC17P034255	11.4462
MYCL	MYCL Proto-Oncogene, BHLH Transcription Factor	Protein Coding	40	GC01M039895	11.4337
PECAM1	Platelet And Endothelial Cell Adhesion Molecule 1	Protein Coding	43	GC17M064319	11.3992
BANCR	BRAF-Activated Non-Protein Coding RNA	RNA Gene	16	GC09M069296	11.3916
BSCL2	BSCL2 Lipid Droplet Biogenesis Associated, Seipin	Protein Coding	45	GC11M096933	11.377
PEG10	Paternally Expressed 10	Protein Coding	42	GC07P094656	11.3381
PRKCA	Protein Kinase C Alpha	Protein Coding	53	GC17P066302	11.3212
MIR675	MicroRNA 675	RNA Gene	22	GC11M003991	11.3181
WNT3A	Wnt Family Member 3A	Protein Coding	50	GC01P229424	11.2889
MIR28	MicroRNA 28	RNA Gene	20	GC03P188688	11.2746
FASN	Fatty Acid Synthase	Protein Coding	51	GC17M082078	11.2605
WNT6	Wnt Family Member 6	Protein Coding	44	GC02P218859	11.2335
CDK12	Cyclin Dependent Kinase 12	Protein Coding	47	GC17P039461	11.231
MLN	Motilin	Protein Coding	38	GC06M033794	11.225
CALB2	Calbindin 2	Protein Coding	42	GC16P071358	11.2223
ACVR1B	Activin A Receptor Type 1B	Protein Coding	49	GC12P051951	11.1986
MIR365A	MicroRNA 365a	RNA Gene	21	GC16P014309	11.1767
HMGA2	High Mobility Group AT-Hook 2	Protein Coding	45	GC12P065824	11.1711
PANDAR	Promoter Of CDKN1A Antisense DNA Damage Activated RNA	RNA Gene	14	GC06M036673	11.1494
JUP	Junction Plakoglobin	Protein Coding	50	GC17M041754	11.1385
LGALS1	Galectin 1	Protein Coding	45	GC22P037675	11.1384
NRG1	Neuregulin 1	Protein Coding	51	GC08P031639	11.132
ROCK1	Rho Associated Coiled-Coil Containing Protein Kinase 1	Protein Coding	52	GC18M020946	11.1043
CREB1	CAMP Responsive Element Binding Protein 1	Protein Coding	51	GC02P207529	11.0878
PTPN3	Protein Tyrosine Phosphatase Non-Receptor Type 3	Protein Coding	46	GC09M109375	11.0875
DIABLO	Diablo IAP-Binding Mitochondrial Protein	Protein Coding	49	GC12M122395	11.0615
ABCC2	ATP Binding Cassette Subfamily C Member 2	Protein Coding	51	GC10P099782	11.0599
BAK1	BCL2 Antagonist/Killer 1	Protein Coding	47	GC06M033572	11.0479
TPBG	Trophoblast Glycoprotein	Protein Coding	44	GC06P088436	11.0443
ACTC1	Actin Alpha Cardiac Muscle 1	Protein Coding	46	GC15M034790	11.0149
PTENP1	Phosphatase And Tensin Homolog Pseudogene 1	Pseudogene	22	GC09M033673	10.987
ECT2	Epithelial Cell Transforming 2	Protein Coding	43	GC03P172750	10.9299
FSCN1	Fascin Actin-Bundling Protein 1	Protein Coding	47	GC07P005592	10.9248
ENO1	Enolase 1	Protein Coding	50	GC01M008861	10.9167
PTGER4	Prostaglandin E Receptor 4	Protein Coding	48	GC05P040679	10.9096
MIR33A	MicroRNA 33a	RNA Gene	21	GC22P041900	10.8965
HOXA11-AS	HOXA11 Antisense RNA	RNA Gene	23	GC07P027184	10.8956
NANOG	Nanog Homeobox	Protein Coding	41	GC12P007787	10.8948
MIR485	MicroRNA 485	RNA Gene	19	GC14P110450	10.8898
WNT10B	Wnt Family Member 10B	Protein Coding	50	GC12M048965	10.8682
WNT2	Wnt Family Member 2	Protein Coding	45	GC07M117309	10.8661
PGC	Progastricsin	Protein Coding	45	GC06M041736	10.858
NDRG1	N-Myc Downstream Regulated 1	Protein Coding	48	GC08M133237	10.8462
FOXO3	Forkhead Box O3	Protein Coding	48	GC06P108559	10.8361
SOX2-OT	SOX2 Overlapping Transcript	RNA Gene	26	GC03P180989	10.7747
KRT17	Keratin 17	Protein Coding	47	GC17M041619	10.7431
ERCC5	ERCC Excision Repair 5, Endonuclease	Protein Coding	47	GC13P102845	10.7393
CD80	CD80 Molecule	Protein Coding	48	GC03M119524	10.7285
EFNA1	Ephrin A1	Protein Coding	47	GC01P155127	10.7183
BECN1	Beclin 1	Protein Coding	48	GC17M042810	10.7128
ELOC	Elongin C	Protein Coding	42	GC08M073939	10.6916
RXRA	Retinoid X Receptor Alpha	Protein Coding	51	GC09P134317	10.6878
MTAP	Methylthioadenosine Phosphorylase	Protein Coding	51	GC09P021792	10.6707
COL14A1	Collagen Type XIV Alpha 1 Chain	Protein Coding	45	GC08P120109	10.6268
OPCML	Opioid Binding Protein/Cell Adhesion Molecule Like	Protein Coding	46	GC11M132405	10.6185
NSD1	Nuclear Receptor Binding SET Domain Protein 1	Protein Coding	47	GC05P177522	10.6093
WNT2B	Wnt Family Member 2B	Protein Coding	47	GC01P112466	10.6091
WNT3	Wnt Family Member 3	Protein Coding	49	GC17M046762	10.5928
HSPA5	Heat Shock Protein Family A (Hsp70) Member 5	Protein Coding	51	GC09M125234	10.5901
SLC7A5	Solute Carrier Family 7 Member 5	Protein Coding	47	GC16M087830	10.5685
CYP2C19	Cytochrome P450 Family 2 Subfamily C Member 19	Protein Coding	48	GC10P094762	10.5639
MIR449A	MicroRNA 449a	RNA Gene	23	GC05M055171	10.5492
TFG	Trafficking From ER To Golgi Regulator	Protein Coding	47	GC03P100709	10.5334
HLA-B	Major Histocompatibility Complex, Class I, B	Protein Coding	48	GC06M069166	10.5326
IGFBP2	Insulin Like Growth Factor Binding Protein 2	Protein Coding	47	GC02P216632	10.5222
CHKA	Choline Kinase Alpha	Protein Coding	45	GC11M068052	10.521
DPP4	Dipeptidyl Peptidase 4	Protein Coding	53	GC02M161992	10.5165
ELN	Elastin	Protein Coding	45	GC07P074027	10.5093
FZD5	Frizzled Class Receptor 5	Protein Coding	50	GC02M207762	10.5036
SPARC	Secreted Protein Acidic And Cysteine Rich	Protein Coding	52	GC05M151661	10.4992
ERCC4	ERCC Excision Repair 4, Endonuclease Catalytic Subunit	Protein Coding	48	GC16P013920	10.4892
CR2	Complement C3d Receptor 2	Protein Coding	50	GC01P207454	10.4795
PLCE1	Phospholipase C Epsilon 1	Protein Coding	47	GC10P093993	10.4753
CCND3	Cyclin D3	Protein Coding	49	GC06M041934	10.4703
LOX	Lysyl Oxidase	Protein Coding	50	GC05M122063	10.4641
S100P	S100 Calcium Binding Protein P	Protein Coding	41	GC04P006700	10.4608
MYCN	MYCN Proto-Oncogene, BHLH Transcription Factor	Protein Coding	50	GC02P015949	10.4348
MIR151A	MicroRNA 151a	RNA Gene	21	GC08M140760	10.4283
BIRC7	Baculoviral IAP Repeat Containing 7	Protein Coding	44	GC20P063235	10.4242
HMOX1	Heme Oxygenase 1	Protein Coding	55	GC22P035380	10.4088
MED12	Mediator Complex Subunit 12	Protein Coding	45	GC0XP071118	10.3903
AAGAB	Alpha And Gamma Adaptin Binding Protein	Protein Coding	42	GC15M067200	10.3903
IL6R	Interleukin 6 Receptor	Protein Coding	53	GC01P154405	10.3898
FZD3	Frizzled Class Receptor 3	Protein Coding	46	GC08P028494	10.3844
GATA6	GATA Binding Protein 6	Protein Coding	50	GC18P022169	10.3632
NPTN-IT1	NPTN Intronic Transcript 1	RNA Gene	15	GC15M073566	10.3566
SLC5A8	Solute Carrier Family 5 Member 8	Protein Coding	45	GC12M101155	10.3527
TRAF3	TNF Receptor Associated Factor 3	Protein Coding	48	GC14P110165	10.3515
LMNB2	Lamin B2	Protein Coding	45	GC19M006001	10.3503
LEP	Leptin	Protein Coding	49	GC07P128241	10.3443
MIR508	MicroRNA 508	RNA Gene	18	GC0XM147236	10.3238
SOCS1	Suppressor Of Cytokine Signaling 1	Protein Coding	46	GC16M012363	10.3189
SASH1	SAM And SH3 Domain Containing 1	Protein Coding	42	GC06P148193	10.3099
ANO1	Anoctamin 1	Protein Coding	45	GC11P070715	10.3004
SNHG20	Small Nucleolar RNA Host Gene 20	RNA Gene	22	GC17P077160	10.2646
MAP2K4	Mitogen-Activated Protein Kinase Kinase 4	Protein Coding	48	GC17P012020	10.2506
STMN1	Stathmin 1	Protein Coding	47	GC01M025884	10.2383
RPS6KB1	Ribosomal Protein S6 Kinase B1	Protein Coding	51	GC17P059893	10.2187
EPHB4	EPH Receptor B4	Protein Coding	56	GC07M102134	10.1973
SNHG16	Small Nucleolar RNA Host Gene 16	RNA Gene	21	GC17P077162	10.1775
TNFRSF8	TNF Receptor Superfamily Member 8	Protein Coding	45	GC01P012063	10.1742
SNHG12	Small Nucleolar RNA Host Gene 12	RNA Gene	26	GC01M028578	10.1723
TINCR	TINCR Ubiquitin Domain Containing	Protein Coding	25	GC19M005558	10.171
ERCC3	ERCC Excision Repair 3, TFIIH Core Complex Helicase Subunit	Protein Coding	50	GC02M127257	10.17
CASP1	Caspase 1	Protein Coding	51	GC11M105025	10.1591
MIR615	MicroRNA 615	RNA Gene	22	GC12P054033	10.1345
SHC1	SHC Adaptor Protein 1	Protein Coding	46	GC01M154962	10.1089
KCMF1	Potassium Channel Modulatory Factor 1	Protein Coding	40	GC02P084971	10.0844
MIR328	MicroRNA 328	RNA Gene	22	GC16M067203	10.0821
RIOX2	Ribosomal Oxygenase 2	Protein Coding	38	GC03M097942	10.0733
APEX1	Apurinic/Apyrimidinic Endodeoxyribonuclease 1	Protein Coding	47	GC14P020455	10.0732
RUVBL1	RuvB Like AAA ATPase 1	Protein Coding	47	GC03M128064	10.0658
NOTCH2	Notch Receptor 2	Protein Coding	54	GC01M119911	10.0553
MCC	MCC Regulator Of WNT Signaling Pathway	Protein Coding	43	GC05M113022	10.055
TRIM27	Tripartite Motif Containing 27	Protein Coding	44	GC06M028903	10.0535
HAGLR	HOXD Antisense Growth-Associated Long Non-Coding RNA	RNA Gene	19	GC02M176173	10.0318
TNFRSF6B	TNF Receptor Superfamily Member 6b	Protein Coding	44	GC20P063696	10.0274
H3-3A	H3.3 Histone A	Protein Coding	40	GC01P226062	10.0211
PRDM2	PR/SET Domain 2	Protein Coding	43	GC01P013700	9.99688
BCAS2	BCAS2 Pre-MRNA Processing Factor	Protein Coding	40	GC01M114567	9.98392
KCNQ1	Potassium Voltage-Gated Channel Subfamily Q Member 1	Protein Coding	52	GC11P002444	9.94588
CXCR3	C-X-C Motif Chemokine Receptor 3	Protein Coding	46	GC0XM071615	9.93938
CD36	CD36 Molecule	Protein Coding	52	GC07P080369	9.93824
LNCRNA-ATB	LncRNA Activated By TGF-Beta	RNA Gene	7	GC14P033850	9.92719
EGOT	Eosinophil Granule Ontogeny Transcript	RNA Gene	23	GC03M004790	9.92272
TEK	TEK Receptor Tyrosine Kinase	Protein Coding	54	GC09P027109	9.89255
REG4	Regenerating Family Member 4	Protein Coding	43	GC01M119794	9.8755
TLR9	Toll Like Receptor 9	Protein Coding	48	GC03M052222	9.86743
POSTN	Periostin	Protein Coding	46	GC13M037562	9.86468
CDH13	Cadherin 13	Protein Coding	47	GC16P082626	9.85742
CSF1R	Colony Stimulating Factor 1 Receptor	Protein Coding	55	GC05M150053	9.85721
SNHG7	Small Nucleolar RNA Host Gene 7	RNA Gene	22	GC09M137645	9.8505
EGR1	Early Growth Response 1	Protein Coding	50	GC05P138465	9.84642
MIR367	MicroRNA 367	RNA Gene	20	GC04M112647	9.83986
FENDRR	FOXF1 Adjacent Non-Coding Developmental Regulatory RNA	RNA Gene	22	GC16M086511	9.8358
MPO	Myeloperoxidase	Protein Coding	55	GC17M058269	9.82722
MTA1	Metastasis Associated 1	Protein Coding	46	GC14P105419	9.82616
PRKDC	Protein Kinase, DNA-Activated, Catalytic Subunit	Protein Coding	53	GC08M047773	9.80695
CASC15	Cancer Susceptibility 15	RNA Gene	20	GC06P021669	9.80319
CXCL1	C-X-C Motif Chemokine Ligand 1	Protein Coding	45	GC04P073869	9.79204
LAG3	Lymphocyte Activating 3	Protein Coding	46	GC12P022367	9.78432
SIRT1	Sirtuin 1	Protein Coding	52	GC10P067884	9.78343
SNHG15	Small Nucleolar RNA Host Gene 15	RNA Gene	23	GC07M044983	9.77939
BIRC2	Baculoviral IAP Repeat Containing 2	Protein Coding	48	GC11P102347	9.771
NAA15	N-Alpha-Acetyltransferase 15, NatA Auxiliary Subunit	Protein Coding	43	GC04P139301	9.76851
IL1A	Interleukin 1 Alpha	Protein Coding	47	GC02M112773	9.75544
NFKB2	Nuclear Factor Kappa B Subunit 2	Protein Coding	54	GC10P102394	9.75482
MIR31HG	MIR31 Host Gene	RNA Gene	20	GC09M021794	9.75381
NNMT	Nicotinamide N-Methyltransferase	Protein Coding	47	GC11P114257	9.75337
FAT2	FAT Atypical Cadherin 2	Protein Coding	40	GC05M151504	9.73149
MICA	MHC Class I Polypeptide-Related Sequence A	Protein Coding	41	GC06P031399	9.7257
YY1AP1	YY1 Associated Protein 1	Protein Coding	41	GC01M155659	9.71293
GJB2	Gap Junction Protein Beta 2	Protein Coding	48	GC13M020187	9.71125
TGFB2	Transforming Growth Factor Beta 2	Protein Coding	54	GC01P218345	9.70287
IL4R	Interleukin 4 Receptor	Protein Coding	51	GC16P028153	9.70286
CSNK1A1	Casein Kinase 1 Alpha 1	Protein Coding	52	GC05M149492	9.69838
CAPN9	Calpain 9	Protein Coding	44	GC01P230747	9.696
CBR3-AS1	CBR3 Antisense RNA 1	RNA Gene	20	GC21M036131	9.69198
MIR130B	MicroRNA 130b	RNA Gene	20	GC22P043541	9.67567
ATAD2	ATPase Family AAA Domain Containing 2	Protein Coding	41	GC08M123319	9.67147
PDCD1LG2	Programmed Cell Death 1 Ligand 2	Protein Coding	45	GC09P005510	9.64638
CDX1	Caudal Type Homeobox 1	Protein Coding	41	GC05P150166	9.64465
JAK1	Janus Kinase 1	Protein Coding	56	GC01M064833	9.63142
HLA-DRB1	Major Histocompatibility Complex, Class II, DR Beta 1	Protein Coding	50	GC06M069255	9.63018
HAVCR2	Hepatitis A Virus Cellular Receptor 2	Protein Coding	48	GC05M157063	9.62043
POLR1H	RNA Polymerase I Subunit H	Protein Coding	38	GC06P091651	9.61295
MIR495	MicroRNA 495	RNA Gene	20	GC14P110456	9.60319
DMD	Dystrophin	Protein Coding	48	GC0XM031097	9.60117
CUL2	Cullin 2	Protein Coding	47	GC10M035046	9.59424
LCN2	Lipocalin 2	Protein Coding	48	GC09P128149	9.58749
ALCAM	Activated Leukocyte Cell Adhesion Molecule	Protein Coding	46	GC03P105366	9.58742
FAH	Fumarylacetoacetate Hydrolase	Protein Coding	50	GC15P080152	9.58427
ZKSCAN1	Zinc Finger With KRAB And SCAN Domains 1	Protein Coding	40	GC07P100015	9.58057
TUSC7	Tumor Suppressor Candidate 7	RNA Gene	19	GC03P116647	9.5805
SF3B1	Splicing Factor 3b Subunit 1	Protein Coding	48	GC02M197432	9.5764
SGK1	Serum/Glucocorticoid Regulated Kinase 1	Protein Coding	51	GC06M134169	9.57155
HOXA13	Homeobox A13	Protein Coding	44	GC07M027636	9.5682
IL18	Interleukin 18	Protein Coding	47	GC11M112143	9.56201
MIR877	MicroRNA 877	RNA Gene	20	GC06P030584	9.55735
FANCI	FA Complementation Group I	Protein Coding	45	GC15P089243	9.54474
GATA4	GATA Binding Protein 4	Protein Coding	50	GC08P011676	9.54062
WNT1	Wnt Family Member 1	Protein Coding	47	GC12P049498	9.53661
CYP17A1	Cytochrome P450 Family 17 Subfamily A Member 1	Protein Coding	51	GC10M102830	9.5342
EWSR1	EWS RNA Binding Protein 1	Protein Coding	47	GC22P040495	9.53165
SF3B2	Splicing Factor 3b Subunit 2	Protein Coding	44	GC11P066050	9.52809
CDKN2C	Cyclin Dependent Kinase Inhibitor 2C	Protein Coding	47	GC01P050960	9.52785
HLA-C	Major Histocompatibility Complex, Class I, C	Protein Coding	47	GC06M069165	9.50605
MIR371A	MicroRNA 371a	RNA Gene	19	GC19P053787	9.49675
UCHL1	Ubiquitin C-Terminal Hydrolase L1	Protein Coding	55	GC04P041256	9.48401
SDHAF2	Succinate Dehydrogenase Complex Assembly Factor 2	Protein Coding	44	GC11P061430	9.48134
CASP7	Caspase 7	Protein Coding	52	GC10P113679	9.47608
SSTR2	Somatostatin Receptor 2	Protein Coding	50	GC17P073165	9.4635
CCNA1	Cyclin A1	Protein Coding	44	GC13P036431	9.4511
MT-CO1	Mitochondrially Encoded Cytochrome C Oxidase I	Protein Coding	34	GCMTP005906	9.43873
LEF1	Lymphoid Enhancer Binding Factor 1	Protein Coding	51	GC04M108047	9.43409
MIR216A	MicroRNA 216a	RNA Gene	22	GC02M055988	9.42172
RIPK1	Receptor Interacting Serine/Threonine Kinase 1	Protein Coding	51	GC06P003313	9.40509
BCYRN1	Brain Cytoplasmic RNA 1	RNA Gene	20	GC02P047331	9.40368
NPC1	NPC Intracellular Cholesterol Transporter 1	Protein Coding	52	GC18M023506	9.40096
CCL5	C-C Motif Chemokine Ligand 5	Protein Coding	46	GC17M035871	9.38746
GADD45A	Growth Arrest And DNA Damage Inducible Alpha	Protein Coding	48	GC01P067685	9.38609
ID1	Inhibitor Of DNA Binding 1, HLH Protein	Protein Coding	44	GC20P031605	9.3837
ZEB1-AS1	ZEB1 Antisense RNA 1	RNA Gene	19	GC10M031166	9.38081
FER1L4	Fer-1 Like Family Member 4 (Pseudogene)	Pseudogene	23	GC20M035558	9.37887
MIR92A2	MicroRNA 92a-2	RNA Gene	18	GC0XM134323	9.36586
S100A7	S100 Calcium Binding Protein A7	Protein Coding	43	GC01M153457	9.35046
CSF1	Colony Stimulating Factor 1	Protein Coding	47	GC01P109911	9.34676
DKC1	Dyskerin Pseudouridine Synthase 1	Protein Coding	49	GC0XP154762	9.33684
NOD2	Nucleotide Binding Oligomerization Domain Containing 2	Protein Coding	50	GC16P050693	9.33377
WRN	WRN RecQ Like Helicase	Protein Coding	48	GC08P031033	9.32628
PIK3CB	Phosphatidylinositol-4,5-Bisphosphate 3-Kinase Catalytic Subunit Beta	Protein Coding	50	GC03M138652	9.32291
HK2	Hexokinase 2	Protein Coding	48	GC02P074833	9.31821
UPK2	Uroplakin 2	Protein Coding	39	GC11P118925	9.30748
CA12	Carbonic Anhydrase 12	Protein Coding	50	GC15M063321	9.28051
UBE2C	Ubiquitin Conjugating Enzyme E2 C	Protein Coding	48	GC20P045812	9.27491
NOS1	Nitric Oxide Synthase 1	Protein Coding	51	GC12M117208	9.25013
CHEK1	Checkpoint Kinase 1	Protein Coding	52	GC11P125625	9.24951
MIR188	MicroRNA 188	RNA Gene	19	GC0XP050003	9.2464
KMT2D	Lysine Methyltransferase 2D	Protein Coding	45	GC12M049018	9.24221
GPT	Glutamic--Pyruvic Transaminase	Protein Coding	44	GC08P144502	9.23948
FOSL1	FOS Like 1, AP-1 Transcription Factor Subunit	Protein Coding	47	GC11M097091	9.2313
CAT	Catalase	Protein Coding	54	GC11P034460	9.22664
PDGFA	Platelet Derived Growth Factor Subunit A	Protein Coding	46	GC07M000497	9.19072
TDGF1	Teratocarcinoma-Derived Growth Factor 1	Protein Coding	47	GC03P047198	9.18926
PTK2B	Protein Tyrosine Kinase 2 Beta	Protein Coding	51	GC08P027311	9.18786
BCAS1	Brain Enriched Myelin Associated Protein 1	Protein Coding	39	GC20M053936	9.17979
BAG1	BAG Cochaperone 1	Protein Coding	43	GC09M033245	9.16122
CYP3A4	Cytochrome P450 Family 3 Subfamily A Member 4	Protein Coding	52	GC07M099759	9.15988
MCM2	Minichromosome Maintenance Complex Component 2	Protein Coding	49	GC03P127598	9.15434
KRT13	Keratin 13	Protein Coding	45	GC17M041500	9.15223
NF2	NF2, Moesin-Ezrin-Radixin Like (MERLIN) Tumor Suppressor	Protein Coding	50	GC22P029603	9.14472
RAD54B	RAD54 Homolog B	Protein Coding	45	GC08M094371	9.13817
MIR515-1	MicroRNA 515-1	RNA Gene	18	GC19P053679	9.13128
DROSHA	Drosha Ribonuclease III	Protein Coding	46	GC05M031401	9.12288
ARNT	Aryl Hydrocarbon Receptor Nuclear Translocator	Protein Coding	47	GC01M150809	9.11725
SYK	Spleen Associated Tyrosine Kinase	Protein Coding	52	GC09P092573	9.11258
MRPL58	Mitochondrial Ribosomal Protein L58	Protein Coding	38	GC17P075015	9.10934
CTSE	Cathepsin E	Protein Coding	44	GC01M206009	9.1041
PXN	Paxillin	Protein Coding	47	GC12M120210	9.10181
SART3	Spliceosome Associated Factor 3, U4/U6 Recycling Protein	Protein Coding	39	GC12M108522	9.09385
TACSTD2	Tumor Associated Calcium Signal Transducer 2	Protein Coding	48	GC01M058575	9.08915
MIR212	MicroRNA 212	RNA Gene	23	GC17M002050	9.08759
CCN4	Cellular Communication Network Factor 4	Protein Coding	41	GC08P133192	9.07717
SQSTM1	Sequestosome 1	Protein Coding	51	GC05P179806	9.07163
POMC	Proopiomelanocortin	Protein Coding	51	GC02M025160	9.05608
MIF	Macrophage Migration Inhibitory Factor	Protein Coding	50	GC22P023894	9.05389
MVP	Major Vault Protein	Protein Coding	43	GC16P041849	9.04672
MAPK10	Mitogen-Activated Protein Kinase 10	Protein Coding	51	GC04M085990	9.03992
CLU	Clusterin	Protein Coding	50	GC08M027596	9.03806
SNHG6	Small Nucleolar RNA Host Gene 6	RNA Gene	21	GC08M066921	8.99253
LAMB3	Laminin Subunit Beta 3	Protein Coding	48	GC01M209614	8.98167
PIGR	Polymeric Immunoglobulin Receptor	Protein Coding	44	GC01M206928	8.96825
TP53COR1	Tumor Protein P53 Pathway Corepressor 1	RNA Gene	9	GC06U903133	8.9627
KIF1B	Kinesin Family Member 1B	Protein Coding	47	GC01P010210	8.95911
ATR	ATR Serine/Threonine Kinase	Protein Coding	54	GC03M142449	8.95651
LIMK1	LIM Domain Kinase 1	Protein Coding	51	GC07P074082	8.95626
PLA2G4A	Phospholipase A2 Group IVA	Protein Coding	51	GC01P186798	8.9559
MIR32	MicroRNA 32	RNA Gene	24	GC09M109046	8.95132
MAGEA4	MAGE Family Member A4	Protein Coding	39	GC0XP151912	8.95104
AKT3	AKT Serine/Threonine Kinase 3	Protein Coding	57	GC01M243488	8.94887
GLI2	GLI Family Zinc Finger 2	Protein Coding	51	GC02P120735	8.94594
SLC25A25-AS1	SLC25A25 Antisense RNA 1	RNA Gene	16	GC09M128108	8.93289
MYCT1	MYC Target 1	Protein Coding	37	GC06P152697	8.9312
TGIF1	TGFB Induced Factor Homeobox 1	Protein Coding	48	GC18P003411	8.93097
IL12RB1	Interleukin 12 Receptor Subunit Beta 1	Protein Coding	48	GC19M018058	8.9291
FGL1	Fibrinogen Like 1	Protein Coding	43	GC08M017864	8.92509
MIR135A1	MicroRNA 135a-1	RNA Gene	22	GC03M052296	8.9228
FOLH1	Folate Hydrolase 1	Protein Coding	50	GC11M096736	8.92188
DKK1	Dickkopf WNT Signaling Pathway Inhibitor 1	Protein Coding	50	GC10P052314	8.92013
RHOC	Ras Homolog Family Member C	Protein Coding	44	GC01M112701	8.91349
PRSS1	Serine Protease 1	Protein Coding	47	GC07P148780	8.9121
PDGFB	Platelet Derived Growth Factor Subunit B	Protein Coding	53	GC22M060099	8.9115
TNK2	Tyrosine Kinase Non Receptor 2	Protein Coding	50	GC03M195863	8.90763
RPSA	Ribosomal Protein SA	Protein Coding	48	GC03P039406	8.90156
CALR	Calreticulin	Protein Coding	54	GC19P012938	8.89243
MUC5B	Mucin 5B, Oligomeric Mucus/Gel-Forming	Protein Coding	44	GC11P001990	8.8855
MDM4	MDM4 Regulator Of P53	Protein Coding	47	GC01P204516	8.88203
PSMD10	Proteasome 26S Subunit, Non-ATPase 10	Protein Coding	43	GC0XM108084	8.87515
DRAIC	Downregulated RNA In Cancer, Inhibitor Of Cell Invasion And Migration	RNA Gene	16	GC15P120476	8.87513
RHOB	Ras Homolog Family Member B	Protein Coding	47	GC02P020447	8.86607
CD5	CD5 Molecule	Protein Coding	45	GC11P061114	8.85858
S100B	S100 Calcium Binding Protein B	Protein Coding	47	GC21M051071	8.85596
EPO	Erythropoietin	Protein Coding	47	GC07P100720	8.85372
GHSR	Growth Hormone Secretagogue Receptor	Protein Coding	50	GC03M172443	8.84816
SPINT2	Serine Peptidase Inhibitor, Kunitz Type 2	Protein Coding	45	GC19P038244	8.84269
RACK1	Receptor For Activated C Kinase 1	Protein Coding	45	GC05M181873	8.83895
BCL6	BCL6 Transcription Repressor	Protein Coding	50	GC03M187721	8.82501
DKK3	Dickkopf WNT Signaling Pathway Inhibitor 3	Protein Coding	44	GC11M011962	8.81632
RAD17	RAD17 Checkpoint Clamp Loader Component	Protein Coding	45	GC05P069369	8.81611
IGF2BP3	Insulin Like Growth Factor 2 MRNA Binding Protein 3	Protein Coding	43	GC07M023320	8.81077
PGF	Placental Growth Factor	Protein Coding	46	GC14M074941	8.80579
PRKD2	Protein Kinase D2	Protein Coding	49	GC19M046674	8.80494
ILK	Integrin Linked Kinase	Protein Coding	48	GC11P006604	8.80101
HDAC9	Histone Deacetylase 9	Protein Coding	50	GC07P018086	8.79893
COL1A1	Collagen Type I Alpha 1 Chain	Protein Coding	52	GC17M050248	8.79774
SOD1	Superoxide Dismutase 1	Protein Coding	56	GC21P031659	8.79215
EPOR	Erythropoietin Receptor	Protein Coding	52	GC19M011377	8.77481
IDO1	Indoleamine 2,3-Dioxygenase 1	Protein Coding	47	GC08P039891	8.77479
PINX1	PIN2 (TERF1) Interacting Telomerase Inhibitor 1	Protein Coding	41	GC08M010764	8.7688
PSMB8	Proteasome 20S Subunit Beta 8	Protein Coding	52	GC06M032840	8.7668
RUFY3	RUN And FYVE Domain Containing 3	Protein Coding	37	GC04P070721	8.76592
ITGA3	Integrin Subunit Alpha 3	Protein Coding	51	GC17P050055	8.76119
YBX1	Y-Box Binding Protein 1	Protein Coding	42	GC01P042682	8.75284
NTRK2	Neurotrophic Receptor Tyrosine Kinase 2	Protein Coding	56	GC09P084668	8.75197
INSM1	INSM Transcriptional Repressor 1	Protein Coding	38	GC20P020368	8.73849
IL2RB	Interleukin 2 Receptor Subunit Beta	Protein Coding	52	GC22M059411	8.73222
PDPK1	3-Phosphoinositide Dependent Protein Kinase 1	Protein Coding	51	GC16P002537	8.73139
CNOT9	CCR4-NOT Transcription Complex Subunit 9	Protein Coding	37	GC02P218569	8.72247
CCDC136	Coiled-Coil Domain Containing 136	Protein Coding	36	GC07P132228	8.71619
NRP1	Neuropilin 1	Protein Coding	50	GC10M033177	8.714
GSDMA	Gasdermin A	Protein Coding	38	GC17P058470	8.71262
HIF1A-AS2	HIF1A Antisense RNA 2	RNA Gene	16	GC14M061747	8.70643
RMRP	RNA Component Of Mitochondrial RNA Processing Endoribonuclease	RNA Gene	26	GC09M035655	8.70622
CYP2D6	Cytochrome P450 Family 2 Subfamily D Member 6	Protein Coding	49	GC22M042126	8.7058
PIWIL1	Piwi Like RNA-Mediated Gene Silencing 1	Protein Coding	43	GC12P130337	8.69086
FGF4	Fibroblast Growth Factor 4	Protein Coding	45	GC11M097247	8.67711
ATP7B	ATPase Copper Transporting Beta	Protein Coding	50	GC13M051930	8.6748
GRB2	Growth Factor Receptor Bound Protein 2	Protein Coding	48	GC17M075318	8.66647
IL15	Interleukin 15	Protein Coding	46	GC04P141636	8.65022
MIR132	MicroRNA 132	RNA Gene	23	GC17M002049	8.6457
RELB	RELB Proto-Oncogene, NF-KB Subunit	Protein Coding	46	GC19P069972	8.64132
ANPEP	Alanyl Aminopeptidase, Membrane	Protein Coding	53	GC15M089784	8.6402
GZMB	Granzyme B	Protein Coding	50	GC14M024630	8.63427
UPK3A	Uroplakin 3A	Protein Coding	40	GC22P045284	8.63145
TP53BP2	Tumor Protein P53 Binding Protein 2	Protein Coding	43	GC01M223779	8.63022
DES	Desmin	Protein Coding	51	GC02P219418	8.62499
LGR5	Leucine Rich Repeat Containing G Protein-Coupled Receptor 5	Protein Coding	46	GC12P071439	8.62213
NUCB2	Nucleobindin 2	Protein Coding	43	GC11P017336	8.62124
CADM1	Cell Adhesion Molecule 1	Protein Coding	46	GC11M115169	8.6182
DEFB1	Defensin Beta 1	Protein Coding	42	GC08M006870	8.61029
AGAP2-AS1	AGAP2 Antisense RNA 1	RNA Gene	16	GC12P057726	8.61003
HLA-DQA1	Major Histocompatibility Complex, Class II, DQ Alpha 1	Protein Coding	44	GC06P087770	8.60576
HOXA-AS2	HOXA Cluster Antisense RNA 2	RNA Gene	20	GC07P027107	8.60282
PSMB9	Proteasome 20S Subunit Beta 9	Protein Coding	48	GC06P087772	8.58476
ACTA2	Actin Alpha 2, Smooth Muscle	Protein Coding	50	GC10M088935	8.57631
NCOA3	Nuclear Receptor Coactivator 3	Protein Coding	50	GC20P047501	8.57521
MIR4435-2HG	MIR4435-2 Host Gene	RNA Gene	20	GC02M111406	8.56815
WT1-AS	WT1 Antisense RNA	RNA Gene	29	GC11P032434	8.56033
PTPRC	Protein Tyrosine Phosphatase Receptor Type C	Protein Coding	54	GC01P198607	8.5434
HLA-DQB1	Major Histocompatibility Complex, Class II, DQ Beta 1	Protein Coding	45	GC06M069264	8.53923
GTF2I	General Transcription Factor IIi	Protein Coding	44	GC07P075846	8.53275
SEMA4A	Semaphorin 4A	Protein Coding	48	GC01P156147	8.52399
TSHR	Thyroid Stimulating Hormone Receptor	Protein Coding	50	GC14P080954	8.52257
MIR491	MicroRNA 491	RNA Gene	21	GC09P020716	8.50612
PEBP1	Phosphatidylethanolamine Binding Protein 1	Protein Coding	49	GC12P118135	8.50297
DUXAP8	Double Homeobox A Pseudogene 8	Pseudogene	9	GC22P015784	8.49657
FAT1	FAT Atypical Cadherin 1	Protein Coding	43	GC04M186587	8.49437
INHA	Inhibin Subunit Alpha	Protein Coding	45	GC02P219569	8.48714
FDPS	Farnesyl Diphosphate Synthase	Protein Coding	48	GC01P155308	8.46816
MIR628	MicroRNA 628	RNA Gene	18	GC15M055372	8.46141
ANXA1	Annexin A1	Protein Coding	51	GC09P073151	8.45698
HPGD	15-Hydroxyprostaglandin Dehydrogenase	Protein Coding	49	GC04M174490	8.45387
CHUK	Component Of Inhibitor Of Nuclear Factor Kappa B Kinase Complex	Protein Coding	54	GC10M100191	8.44899
TKT	Transketolase	Protein Coding	48	GC03M053224	8.44215
MIR202	MicroRNA 202	RNA Gene	21	GC10M133247	8.44022
PLAG1	PLAG1 Zinc Finger	Protein Coding	43	GC08M056369	8.41816
NR3C1	Nuclear Receptor Subfamily 3 Group C Member 1	Protein Coding	51	GC05M143277	8.41049
EGLN1	Egl-9 Family Hypoxia Inducible Factor 1	Protein Coding	52	GC01M231363	8.39549
MIR500A	MicroRNA 500a	RNA Gene	18	GC0XP050008	8.39373
MIAT	Myocardial Infarction Associated Transcript	RNA Gene	26	GC22P026646	8.38431
CSNK2B	Casein Kinase 2 Beta	Protein Coding	50	GC06P087734	8.37577
AMIGO2	Adhesion Molecule With Ig Like Domain 2	Protein Coding	42	GC12M047077	8.37456
PRKAA1	Protein Kinase AMP-Activated Catalytic Subunit Alpha 1	Protein Coding	50	GC05M040759	8.36965
GJA1	Gap Junction Protein Alpha 1	Protein Coding	53	GC06P121436	8.36855
RECQL5	RecQ Like Helicase 5	Protein Coding	41	GC17M075626	8.36149
MIR26B	MicroRNA 26b	RNA Gene	24	GC02P218402	8.35739
IL11	Interleukin 11	Protein Coding	43	GC19M055364	8.35633
MIR876	MicroRNA 876	RNA Gene	19	GC09M028855	8.35567
IGFBP6	Insulin Like Growth Factor Binding Protein 6	Protein Coding	46	GC12P053097	8.34702
MIR218-1	MicroRNA 218-1	RNA Gene	20	GC04P020866	8.3414
PTK7	Protein Tyrosine Kinase 7 (Inactive)	Protein Coding	47	GC06P043076	8.34097
S100A2	S100 Calcium Binding Protein A2	Protein Coding	43	GC01M153561	8.33636
LINC01234	Long Intergenic Non-Protein Coding RNA 1234	RNA Gene	17	GC12M113584	8.33485
INSR	Insulin Receptor	Protein Coding	56	GC19M007112	8.33474
CEBPB	CCAAT Enhancer Binding Protein Beta	Protein Coding	45	GC20P050190	8.32941
LINC-PINT	Long Intergenic Non-Protein Coding RNA, P53 Induced Transcript	RNA Gene	21	GC07M130794	8.32408
HDGF	Heparin Binding Growth Factor	Protein Coding	43	GC01M156925	8.31698
MIR19B1	MicroRNA 19b-1	RNA Gene	20	GC13P091564	8.31291
ST13	ST13 Hsp70 Interacting Protein	Protein Coding	41	GC22M059441	8.30585
WNT9A	Wnt Family Member 9A	Protein Coding	45	GC01M227920	8.30299
RARS1	Arginyl-TRNA Synthetase 1	Protein Coding	47	GC05P168487	8.30013
TFAP2A	Transcription Factor AP-2 Alpha	Protein Coding	49	GC06M010393	8.29548
E2F3	E2F Transcription Factor 3	Protein Coding	43	GC06P020402	8.29442
DMBT1	Deleted In Malignant Brain Tumors 1	Protein Coding	43	GC10P122560	8.29432
BRINP3	BMP/Retinoic Acid Inducible Neural Specific 3	Protein Coding	36	GC01M190067	8.28783
SFTPC	Surfactant Protein C	Protein Coding	44	GC08P022156	8.28571
IL6ST	Interleukin 6 Cytokine Family Signal Transducer	Protein Coding	52	GC05M055935	8.28541
ANGPT1	Angiopoietin 1	Protein Coding	49	GC08M107246	8.26065
ESM1	Endothelial Cell Specific Molecule 1	Protein Coding	43	GC05M054977	8.25516
GGT1	Gamma-Glutamyltransferase 1	Protein Coding	52	GC22P024583	8.25474
FOXA1	Forkhead Box A1	Protein Coding	45	GC14M037589	8.24867
NORAD	Non-Coding RNA Activated By DNA Damage	RNA Gene	19	GC20M036277	8.24493
ZNRF3	Zinc And Ring Finger 3	Protein Coding	37	GC22P028883	8.24107
DHFR	Dihydrofolate Reductase	Protein Coding	51	GC05M080626	8.23929
FAM120A	Family With Sequence Similarity 120A	Protein Coding	41	GC09P093783	8.2361
FERMT1	FERM Domain Containing Kindlin 1	Protein Coding	45	GC20M006074	8.23282
TCHP	Trichoplein Keratin Filament Binding	Protein Coding	37	GC12P109900	8.22414
CLPTM1L	CLPTM1 Like	Protein Coding	41	GC05M001317	8.21541
F3	Coagulation Factor III, Tissue Factor	Protein Coding	48	GC01M094599	8.21437
CASR	Calcium Sensing Receptor	Protein Coding	53	GC03P122183	8.21241
BICDL3P	BICD Family Like 3, Pseudogene	RNA Gene	11	GC07P076009	8.20684
SFN	Stratifin	Protein Coding	48	GC01P028244	8.18892
CTBP2	C-Terminal Binding Protein 2	Protein Coding	46	GC10M124984	8.1866
EGLN3	Egl-9 Family Hypoxia Inducible Factor 3	Protein Coding	48	GC14M033924	8.18175
GLUL	Glutamate-Ammonia Ligase	Protein Coding	51	GC01M182378	8.18172
GSN	Gelsolin	Protein Coding	51	GC09P121201	8.18114
TDRG1	Testis Development Related 1	RNA Gene	24	GC06P087952	8.17641
TCF7	Transcription Factor 7	Protein Coding	46	GC05P134114	8.17608
ABCB11	ATP Binding Cassette Subfamily B Member 11	Protein Coding	49	GC02M168922	8.17539
LIF	LIF Interleukin 6 Family Cytokine	Protein Coding	45	GC22M030240	8.17425
MIR187	MicroRNA 187	RNA Gene	20	GC18M035904	8.17106
EPHA3	EPH Receptor A3	Protein Coding	49	GC03P089077	8.16885
SEMA3B	Semaphorin 3B	Protein Coding	43	GC03P050267	8.16696
METTL3	Methyltransferase 3, N6-Adenosine-Methyltransferase Complex Catalytic Subunit	Protein Coding	44	GC14M021498	8.16466
PRL	Prolactin	Protein Coding	45	GC06M022287	8.15573
FOXO1	Forkhead Box O1	Protein Coding	51	GC13M040555	8.14908
IL13	Interleukin 13	Protein Coding	48	GC05P132656	8.14046
HSPA1A	Heat Shock Protein Family A (Hsp70) Member 1A	Protein Coding	48	GC06P087759	8.14031
MIR625	MicroRNA 625	RNA Gene	17	GC14P065471	8.13521
DSP	Desmoplakin	Protein Coding	53	GC06P007541	8.11136
EPIST	Esophagus Epithelial Intergenic Associated Transcript	RNA Gene	16	GC05M135142	8.10144
INS-IGF2	INS-IGF2 Readthrough	Protein Coding	29	GC11M004001	8.08209
EPHX1	Epoxide Hydrolase 1	Protein Coding	48	GC01P225810	8.06736
GPER1	G Protein-Coupled Estrogen Receptor 1	Protein Coding	45	GC07P002158	8.06593
BLACAT1	BLACAT1 Overlapping LEMD1 Locus	Protein Coding	16	GC01M205434	8.06143
TFRC	Transferrin Receptor	Protein Coding	54	GC03M196031	8.06114
RRM2	Ribonucleotide Reductase Regulatory Subunit M2	Protein Coding	51	GC02P010123	8.05908
ADH7	Alcohol Dehydrogenase 7 (Class IV), Mu Or Sigma Polypeptide	Protein Coding	45	GC04M099412	8.04491
POLH	DNA Polymerase Eta	Protein Coding	51	GC06P043576	8.04293
DPF2	Double PHD Fingers 2	Protein Coding	44	GC11P070426	8.03982
TRAF6	TNF Receptor Associated Factor 6	Protein Coding	48	GC11M036467	8.03192
NCF1	Neutrophil Cytosolic Factor 1	Protein Coding	50	GC07P075854	8.02684
HLTF	Helicase Like Transcription Factor	Protein Coding	42	GC03M149030	8.02666
E2F2	E2F Transcription Factor 2	Protein Coding	45	GC01M023668	8.0184
HNRNPK	Heterogeneous Nuclear Ribonucleoprotein K	Protein Coding	47	GC09M095069	8.0165
SMARCC2	SWI/SNF Related, Matrix Associated, Actin Dependent Regulator Of Chromatin Subfamily C Member 2	Protein Coding	47	GC12M056939	8.01476
CD81	CD81 Molecule	Protein Coding	49	GC11P002548	8.01055
MSTO2P	Misato Family Member 2, Pseudogene	Pseudogene	14	GC01P155745	8.01013
PLG	Plasminogen	Protein Coding	52	GC06P160702	8.00847
GCM2	Glial Cells Missing Transcription Factor 2	Protein Coding	43	GC06M010873	7.99808
SNHG5	Small Nucleolar RNA Host Gene 5	RNA Gene	23	GC06M085650	7.99103
BMP4	Bone Morphogenetic Protein 4	Protein Coding	51	GC14M053949	7.98479
UBE2T	Ubiquitin Conjugating Enzyme E2 T	Protein Coding	47	GC01M202332	7.9823
CLDN23	Claudin 23	Protein Coding	39	GC08P008701	7.96442
PRKCI	Protein Kinase C Iota	Protein Coding	50	GC03P170222	7.9623
MIR497	MicroRNA 497	RNA Gene	23	GC17M007022	7.96142
RPL15	Ribosomal Protein L15	Protein Coding	46	GC03P023916	7.96055
CHD1	Chromodomain Helicase DNA Binding Protein 1	Protein Coding	48	GC05M098853	7.95695
DOCK8	Dedicator Of Cytokinesis 8	Protein Coding	47	GC09P000214	7.95323
ELF3	E74 Like ETS Transcription Factor 3	Protein Coding	41	GC01P202007	7.95295
BTK	Bruton Tyrosine Kinase	Protein Coding	55	GC0XM101349	7.94844
RBX1	Ring-Box 1	Protein Coding	46	GC22P040951	7.93891
RAD51B	RAD51 Paralog B	Protein Coding	39	GC14P067819	7.93533
TGFB3	Transforming Growth Factor Beta 3	Protein Coding	52	GC14M075958	7.93319
ADAR	Adenosine Deaminase RNA Specific	Protein Coding	48	GC01M154582	7.92577
YY1	YY1 Transcription Factor	Protein Coding	51	GC14P100238	7.9219
MIR512-1	MicroRNA 512-1	RNA Gene	17	GC19P070423	7.91664
EML4	EMAP Like 4	Protein Coding	42	GC02P042169	7.90678
INHBA	Inhibin Subunit Beta A	Protein Coding	48	GC07M041668	7.89955
FGF1	Fibroblast Growth Factor 1	Protein Coding	50	GC05M142555	7.8966
BCL2L11	BCL2 Like 11	Protein Coding	47	GC02P111119	7.88954
FAM72D	Family With Sequence Similarity 72 Member D	Protein Coding	27	GC01P145097	7.87651
ACTN4	Actinin Alpha 4	Protein Coding	49	GC19P038647	7.87479
FEZF1-AS1	FEZF1 Antisense RNA 1	RNA Gene	18	GC07P122303	7.8679
MIR3936HG	MIR3936 Host Gene	RNA Gene	16	GC05M132312	7.84185
LINC00312	Long Intergenic Non-Protein Coding RNA 312	RNA Gene	20	GC03P008571	7.84073
PKHD1	PKHD1 Ciliary IPT Domain Containing Fibrocystin/Polyductin	Protein Coding	41	GC06M069563	7.82988
FGF3	Fibroblast Growth Factor 3	Protein Coding	47	GC11M097248	7.82932
STAT5A	Signal Transducer And Activator Of Transcription 5A	Protein Coding	50	GC17P042287	7.82197
SOX11	SRY-Box Transcription Factor 11	Protein Coding	43	GC02P005703	7.82125
ALOX12	Arachidonate 12-Lipoxygenase, 12S Type	Protein Coding	47	GC17P006995	7.81804
MYH11	Myosin Heavy Chain 11	Protein Coding	48	GC16M015831	7.81288
RFC4	Replication Factor C Subunit 4	Protein Coding	45	GC03M186789	7.8114
GRPR	Gastrin Releasing Peptide Receptor	Protein Coding	48	GC0XP016141	7.80559
MMP10	Matrix Metallopeptidase 10	Protein Coding	47	GC11M102770	7.79608
DVL1	Dishevelled Segment Polarity Protein 1	Protein Coding	49	GC01M001335	7.79589
KDM5C	Lysine Demethylase 5C	Protein Coding	48	GC0XM053176	7.79219
DLEU1	Deleted In Lymphocytic Leukemia 1	RNA Gene	31	GC13P050127	7.78763
SNHG8	Small Nucleolar RNA Host Gene 8	RNA Gene	22	GC04P118278	7.78552
LAMA3	Laminin Subunit Alpha 3	Protein Coding	48	GC18P023689	7.78351
EDN1	Endothelin 1	Protein Coding	51	GC06P012256	7.78148
F2RL1	F2R Like Trypsin Receptor 1	Protein Coding	47	GC05P076818	7.77892
ADIPOQ	Adiponectin, C1Q And Collagen Domain Containing	Protein Coding	48	GC03P186842	7.77875
AURKB	Aurora Kinase B	Protein Coding	52	GC17M010614	7.77413
ETV4	ETS Variant Transcription Factor 4	Protein Coding	45	GC17M043527	7.77158
KRT10	Keratin 10	Protein Coding	45	GC17M040818	7.76584
FAP	Fibroblast Activation Protein Alpha	Protein Coding	48	GC02M162170	7.76318
PCAT29	Prostate Cancer Associated Transcript 29	RNA Gene	17	GC15P121854	7.76249
TMEM8B	Transmembrane Protein 8B	Protein Coding	38	GC09P035814	7.75797
PTTG1	PTTG1 Regulator Of Sister Chromatid Separation, Securin	Protein Coding	43	GC05P160422	7.7559
CCN2	Cellular Communication Network Factor 2	Protein Coding	48	GC06M131948	7.75414
FEZF1	FEZ Family Zinc Finger 1	Protein Coding	41	GC07M122301	7.75148
AKR1B10	Aldo-Keto Reductase Family 1 Member B10	Protein Coding	45	GC07P134527	7.74209
ZNF217	Zinc Finger Protein 217	Protein Coding	40	GC20M053567	7.73772
RPS20	Ribosomal Protein S20	Protein Coding	45	GC08M056067	7.735
PAX5	Paired Box 5	Protein Coding	48	GC09M036859	7.7273
LOC110806263	TERT 5' Regulatory Region	Biological Region	4	GC05P001294	7.72405
WNT10A	Wnt Family Member 10A	Protein Coding	48	GC02P218904	7.72048
ITGAV	Integrin Subunit Alpha V	Protein Coding	51	GC02P186589	7.71492
BCAR4	Breast Cancer Anti-Estrogen Resistance 4	RNA Gene	19	GC16M012390	7.70233
MIR30C1	MicroRNA 30c-1	RNA Gene	23	GC01P040757	7.69882
SMARCAD1	SWI/SNF-Related, Matrix-Associated Actin-Dependent Regulator Of Chromatin, Subfamily A, Containing DEAD/H Box 1	Protein Coding	47	GC04P094207	7.69504
GPX3	Glutathione Peroxidase 3	Protein Coding	44	GC05P150997	7.69222
EBAG9	Estrogen Receptor Binding Site Associated Antigen 9	Protein Coding	41	GC08P109536	7.68485
POLR1HASP	POLR1H Antisense, Pseudogene	Pseudogene	19	GC06M071145	7.68472
CYP1B1	Cytochrome P450 Family 1 Subfamily B Member 1	Protein Coding	50	GC02M038066	7.68135
CENPF	Centromere Protein F	Protein Coding	45	GC01P214603	7.66316
UBE3A	Ubiquitin Protein Ligase E3A	Protein Coding	50	GC15M025333	7.66199
CLDN1	Claudin 1	Protein Coding	48	GC03M190305	7.65212
EPHA1	EPH Receptor A1	Protein Coding	50	GC07M143390	7.6392
TPO	Thyroid Peroxidase	Protein Coding	52	GC02P001374	7.63864
CACYBP	Calcyclin Binding Protein	Protein Coding	41	GC01P175001	7.6252
MIR378A	MicroRNA 378a	RNA Gene	23	GC05P149732	7.62518
AMER1	APC Membrane Recruitment Protein 1	Protein Coding	38	GC0XM064185	7.62208
KIF15	Kinesin Family Member 15	Protein Coding	40	GC03P046944	7.60815
GBA1	Glucosylceramidase Beta 1	Protein Coding	50	GC01M155318	7.60265
KRT15	Keratin 15	Protein Coding	41	GC17M041513	7.60216
STK10	Serine/Threonine Kinase 10	Protein Coding	45	GC05M172042	7.60159
MYBL2	MYB Proto-Oncogene Like 2	Protein Coding	45	GC20P043667	7.60046
LTA	Lymphotoxin Alpha	Protein Coding	47	GC06P087729	7.59957
NEDD9	Neural Precursor Cell Expressed, Developmentally Down-Regulated 9	Protein Coding	44	GC06M011183	7.58797
ALDOA	Aldolase, Fructose-Bisphosphate A	Protein Coding	51	GC16P030064	7.5853
SULF1	Sulfatase 1	Protein Coding	44	GC08P069466	7.58098
ADAM17	ADAM Metallopeptidase Domain 17	Protein Coding	54	GC02M009488	7.57903
XBP1	X-Box Binding Protein 1	Protein Coding	47	GC22M028794	7.57629
NCOR1	Nuclear Receptor Corepressor 1	Protein Coding	47	GC17M016029	7.54626
FUT2	Fucosyltransferase 2	Protein Coding	48	GC19P048695	7.54521
SLC4A2	Solute Carrier Family 4 Member 2	Protein Coding	45	GC07P151057	7.54371
CTCF	CCCTC-Binding Factor	Protein Coding	49	GC16P067563	7.5427
NOL8	Nucleolar Protein 8	Protein Coding	40	GC09M092297	7.53914
PPARA	Peroxisome Proliferator Activated Receptor Alpha	Protein Coding	49	GC22P046150	7.5343
CD86	CD86 Molecule	Protein Coding	46	GC03P122055	7.53009
CTNNBIP1	Catenin Beta Interacting Protein 1	Protein Coding	43	GC01M009848	7.52909
CYP21A2	Cytochrome P450 Family 21 Subfamily A Member 2	Protein Coding	46	GC06P087764	7.52483
IGFBP5	Insulin Like Growth Factor Binding Protein 5	Protein Coding	45	GC02M216672	7.51782
MIR379	MicroRNA 379	RNA Gene	19	GC14P110441	7.50628
BTRC	Beta-Transducin Repeat Containing E3 Ubiquitin Protein Ligase	Protein Coding	48	GC10P101354	7.50329
DMTF1	Cyclin D Binding Myb Like Transcription Factor 1	Protein Coding	38	GC07P087155	7.49921
FAF1	Fas Associated Factor 1	Protein Coding	44	GC01M050439	7.48503
CD247	CD247 Molecule	Protein Coding	52	GC01M167399	7.48458
CEBPA-DT	CEBPA Divergent Transcript	RNA Gene	18	GC19P069575	7.4805
CDC42	Cell Division Cycle 42	Protein Coding	53	GC01P022052	7.47904
MGAT5	Alpha-1,6-Mannosylglycoprotein 6-Beta-N-Acetylglucosaminyltransferase	Protein Coding	44	GC02P134119	7.46725
GRN	Granulin Precursor	Protein Coding	51	GC17P044345	7.46583
SOX10	SRY-Box Transcription Factor 10	Protein Coding	48	GC22M060963	7.4582
ROR1	Receptor Tyrosine Kinase Like Orphan Receptor 1	Protein Coding	50	GC01P063774	7.4552
ERG	ETS Transcription Factor ERG	Protein Coding	48	GC21M038367	7.45456
TSG101	Tumor Susceptibility 101	Protein Coding	45	GC11M018468	7.45447
LUCAT1	Lung Cancer Associated Transcript 1	RNA Gene	18	GC05M091054	7.44635
MICB	MHC Class I Polypeptide-Related Sequence B	Protein Coding	43	GC06P087725	7.43262
MAPK9	Mitogen-Activated Protein Kinase 9	Protein Coding	52	GC05M180260	7.42939
CCN1	Cellular Communication Network Factor 1	Protein Coding	41	GC01P085581	7.4232
MIR7-1	MicroRNA 7-1	RNA Gene	18	GC09M095071	7.42068
TUBB	Tubulin Beta Class I	Protein Coding	53	GC06P087706	7.41031
LASP1	LIM And SH3 Protein 1	Protein Coding	44	GC17P038869	7.4093
ABCB4	ATP Binding Cassette Subfamily B Member 4	Protein Coding	50	GC07M087365	7.40325
TINF2	TERF1 Interacting Nuclear Factor 2	Protein Coding	44	GC14M024277	7.39877
GSE1	Gse1 Coiled-Coil Protein	Protein Coding	36	GC16P085171	7.39757
PODXL	Podocalyxin Like	Protein Coding	45	GC07M131500	7.38555
MIR885	MicroRNA 885	RNA Gene	20	GC03M010480	7.38111
ATP8B1	ATPase Phospholipid Transporting 8B1	Protein Coding	43	GC18M057646	7.37226
HTATIP2	HIV-1 Tat Interactive Protein 2	Protein Coding	42	GC11P020363	7.37072
PIK3R3	Phosphoinositide-3-Kinase Regulatory Subunit 3	Protein Coding	45	GC01M046041	7.36647
MIR337	MicroRNA 337	RNA Gene	21	GC14P110434	7.36631
MDK	Midkine	Protein Coding	47	GC11P046380	7.36625
RBM39	RNA Binding Motif Protein 39	Protein Coding	41	GC20M035703	7.36385
AQP1	Aquaporin 1 (Colton Blood Group)	Protein Coding	50	GC07P030911	7.36371
TCERG1	Transcription Elongation Regulator 1	Protein Coding	42	GC05P146447	7.35273
RASGRP1	RAS Guanyl Releasing Protein 1	Protein Coding	50	GC15M038488	7.34764
ADM	Adrenomedullin	Protein Coding	47	GC11P010304	7.34518
ACE	Angiotensin I Converting Enzyme	Protein Coding	54	GC17P063477	7.33783
CXCR1	C-X-C Motif Chemokine Receptor 1	Protein Coding	48	GC02M218162	7.33605
GSTM3	Glutathione S-Transferase Mu 3	Protein Coding	49	GC01M109733	7.33458
IGF2BP2	Insulin Like Growth Factor 2 MRNA Binding Protein 2	Protein Coding	47	GC03M185643	7.32913
RRP7A	Ribosomal RNA Processing 7 Homolog A	Protein Coding	43	GC22M042508	7.32623
MIR494	MicroRNA 494	RNA Gene	18	GC14P110455	7.32459
ROR2	Receptor Tyrosine Kinase Like Orphan Receptor 2	Protein Coding	51	GC09M095287	7.32256
SOCS3	Suppressor Of Cytokine Signaling 3	Protein Coding	45	GC17M078356	7.32068
PTPRG	Protein Tyrosine Phosphatase Receptor Type G	Protein Coding	47	GC03P061561	7.31028
PLIN2	Perilipin 2	Protein Coding	44	GC09M019173	7.30752
H2AX	H2A.X Variant Histone	Protein Coding	45	GC11M119250	7.30739
DUXAP9	Double Homeobox A Pseudogene 9	Pseudogene	10	GC14P033271	7.30686
HBB	Hemoglobin Subunit Beta	Protein Coding	47	GC11M006673	7.30346
MCM4	Minichromosome Maintenance Complex Component 4	Protein Coding	50	GC08P047965	7.29301
IVL	Involucrin	Protein Coding	40	GC01P152919	7.29201
TNFRSF1A	TNF Receptor Superfamily Member 1A	Protein Coding	52	GC12M006328	7.29153
ALDH1A1	Aldehyde Dehydrogenase 1 Family Member A1	Protein Coding	50	GC09M072900	7.28793
CNDP2	Carnosine Dipeptidase 2	Protein Coding	45	GC18P074495	7.28687
ITGA5	Integrin Subunit Alpha 5	Protein Coding	52	GC12M054977	7.28493
SALL4	Spalt Like Transcription Factor 4	Protein Coding	46	GC20M051784	7.27881
SOS1	SOS Ras/Rac Guanine Nucleotide Exchange Factor 1	Protein Coding	51	GC02M039043	7.27047
CCNG1	Cyclin G1	Protein Coding	43	GC05P163438	7.26762
PRDM16-DT	PRDM16 Divergent Transcript	RNA Gene	22	GC01M007064	7.25736
BRD3	Bromodomain Containing 3	Protein Coding	44	GC09M134030	7.25297
CDC25A	Cell Division Cycle 25A	Protein Coding	50	GC03M048183	7.25097
ADH1B	Alcohol Dehydrogenase 1B (Class I), Beta Polypeptide	Protein Coding	45	GC04M099304	7.24426
CLDN8	Claudin 8	Protein Coding	39	GC21M030214	7.24376
CXCL9	C-X-C Motif Chemokine Ligand 9	Protein Coding	44	GC04M076001	7.24192
PHF20	PHD Finger Protein 20	Protein Coding	40	GC20P035771	7.23879
TMPRSS2	Transmembrane Serine Protease 2	Protein Coding	50	GC21M041464	7.23778
IL24	Interleukin 24	Protein Coding	44	GC01P206897	7.23691
TXN	Thioredoxin	Protein Coding	48	GC09M110243	7.23406
FAN1	FANCD2 And FANCI Associated Nuclease 1	Protein Coding	40	GC15P044259	7.23404
MLXIPL	MLX Interacting Protein Like	Protein Coding	45	GC07M073593	7.23296
ACTL6A	Actin Like 6A	Protein Coding	44	GC03P179562	7.23142
GAL3ST1	Galactose-3-O-Sulfotransferase 1	Protein Coding	40	GC22M030554	7.22992
MZB1	Marginal Zone B And B1 Cell Specific Protein	Protein Coding	37	GC05M139387	7.22344
HSPD1	Heat Shock Protein Family D (Hsp60) Member 1	Protein Coding	51	GC02M197486	7.22006
ERN1	Endoplasmic Reticulum To Nucleus Signaling 1	Protein Coding	48	GC17M064039	7.21587
STC2	Stanniocalcin 2	Protein Coding	45	GC05M173314	7.21583
PPHLN1	Periphilin 1	Protein Coding	37	GC12P042238	7.21365
ARID4B	AT-Rich Interaction Domain 4B	Protein Coding	39	GC01M235133	7.21168
IKBKB	Inhibitor Of Nuclear Factor Kappa B Kinase Subunit Beta	Protein Coding	56	GC08P042271	7.20428
FANCA	FA Complementation Group A	Protein Coding	51	GC16M089825	7.19709
MIR503	MicroRNA 503	RNA Gene	23	GC0XM134696	7.19328
MIR501	MicroRNA 501	RNA Gene	18	GC0XP050995	7.18984
MIR377	MicroRNA 377	RNA Gene	20	GC14P110440	7.1846
PGAP3	Post-GPI Attachment To Proteins Phospholipase 3	Protein Coding	41	GC17M049234	7.17856
MAT1A	Methionine Adenosyltransferase 1A	Protein Coding	48	GC10M080271	7.17753
PIK3R2	Phosphoinositide-3-Kinase Regulatory Subunit 2	Protein Coding	52	GC19P018153	7.17273
FUCA2	Alpha-L-Fucosidase 2	Protein Coding	44	GC06M143494	7.17267
SFRP2	Secreted Frizzled Related Protein 2	Protein Coding	43	GC04M153780	7.1701
APAF1	Apoptotic Peptidase Activating Factor 1	Protein Coding	48	GC12P098645	7.15656
ADH1C	Alcohol Dehydrogenase 1C (Class I), Gamma Polypeptide	Protein Coding	42	GC04M099336	7.15314
TP73-AS1	TP73 Antisense RNA 1	RNA Gene	24	GC01M007075	7.13665
PTPN1	Protein Tyrosine Phosphatase Non-Receptor Type 1	Protein Coding	54	GC20P050510	7.13618
MIR20B	MicroRNA 20b	RNA Gene	18	GC0XM134325	7.13294
SOX17	SRY-Box Transcription Factor 17	Protein Coding	44	GC08P054457	7.13134
CD276	CD276 Molecule	Protein Coding	45	GC15P073683	7.12981
PYGO2	Pygopus Family PHD Finger 2	Protein Coding	40	GC01M154957	7.1276
NUDT1	Nudix Hydrolase 1	Protein Coding	44	GC07P002242	7.11752
GH1	Growth Hormone 1	Protein Coding	46	GC17M063917	7.11423
CAGE1	Cancer Antigen 1	Protein Coding	37	GC06M007326	7.11304
LINC00941	Long Intergenic Non-Protein Coding RNA 941	RNA Gene	17	GC12P030757	7.11167
FLNC	Filamin C	Protein Coding	48	GC07P128830	7.10567
TJP2	Tight Junction Protein 2	Protein Coding	47	GC09P069121	7.10563
NES	Nestin	Protein Coding	42	GC01M156668	7.10532
THBD	Thrombomodulin	Protein Coding	49	GC20M023026	7.10413
STARD13	StAR Related Lipid Transfer Domain Containing 13	Protein Coding	42	GC13M033103	7.10062
MIR873	MicroRNA 873	RNA Gene	19	GC09M028880	7.09942
PCLAF	PCNA Clamp Associated Factor	Protein Coding	37	GC15M118565	7.09366
CTBP1	C-Terminal Binding Protein 1	Protein Coding	49	GC04M001211	7.09093
SFTA1P	Surfactant Associated 1, LncRNA	Pseudogene	20	GC10M010784	7.09058
HDAC2	Histone Deacetylase 2	Protein Coding	54	GC06M113933	7.08895
RTEL1	Regulator Of Telomere Elongation Helicase 1	Protein Coding	43	GC20P063658	7.07561
PPARD	Peroxisome Proliferator Activated Receptor Delta	Protein Coding	48	GC06P087880	7.06832
NAT1	N-Acetyltransferase 1	Protein Coding	45	GC08P018179	7.06745
ABCC3	ATP Binding Cassette Subfamily C Member 3	Protein Coding	49	GC17P050634	7.06705
SRA1	Steroid Receptor RNA Activator 1	Protein Coding	40	GC05M140537	7.06158
ETS2	ETS Proto-Oncogene 2, Transcription Factor	Protein Coding	46	GC21P038805	7.05958
AHR	Aryl Hydrocarbon Receptor	Protein Coding	50	GC07P016916	7.0492
PANTR1	POU3F3 Adjacent Non-Coding Transcript 1	RNA Gene	19	GC02M104806	7.04192
CCAR2	Cell Cycle And Apoptosis Regulator 2	Protein Coding	39	GC08P022604	7.03284
ADGRE5	Adhesion G Protein-Coupled Receptor E5	Protein Coding	45	GC19P014671	7.03268
COMT	Catechol-O-Methyltransferase	Protein Coding	54	GC22P019941	7.02443
SLC25A16	Solute Carrier Family 25 Member 16	Protein Coding	40	GC10M068477	7.01815
LGALS7	Galectin 7	Protein Coding	38	GC19M038770	7.01672
TRAF2	TNF Receptor Associated Factor 2	Protein Coding	47	GC09P136881	7.0163
HAMP	Hepcidin Antimicrobial Peptide	Protein Coding	46	GC19P069623	7.00941
MIR135B	MicroRNA 135b	RNA Gene	23	GC01M205448	7.0091
REG1A	Regenerating Family Member 1 Alpha	Protein Coding	43	GC02P079120	7.00768
CD79A	CD79a Molecule	Protein Coding	50	GC19P041877	6.99607
CTSL	Cathepsin L	Protein Coding	50	GC09P087725	6.99496
TCF7L1	Transcription Factor 7 Like 1	Protein Coding	44	GC02P085133	6.99091
AIP	Aryl Hydrocarbon Receptor Interacting Protein	Protein Coding	45	GC11P067468	6.98961
MMP12	Matrix Metallopeptidase 12	Protein Coding	50	GC11M102862	6.98958
ELL2	Elongation Factor For RNA Polymerase II 2	Protein Coding	41	GC05M095885	6.9844
CHTF8	Chromosome Transmission Fidelity Factor 8	Protein Coding	35	GC16M069122	6.97384
RREB1	Ras Responsive Element Binding Protein 1	Protein Coding	44	GC06P007107	6.96799
CP	Ceruloplasmin	Protein Coding	51	GC03M149162	6.96397
SPINK1	Serine Peptidase Inhibitor Kazal Type 1	Protein Coding	44	GC05M147825	6.96262
PTPA	Protein Phosphatase 2 Phosphatase Activator	Protein Coding	44	GC09P129111	6.95465
CXCL10	C-X-C Motif Chemokine Ligand 10	Protein Coding	47	GC04M076021	6.95128
ITGB3	Integrin Subunit Beta 3	Protein Coding	55	GC17P058846	6.94723
MIR301A	MicroRNA 301a	RNA Gene	22	GC17M059151	6.94679
MIR432	MicroRNA 432	RNA Gene	19	GC14P110112	6.94373
MLANA	Melan-A	Protein Coding	43	GC09P007504	6.92965
ELOB	Elongin B	Protein Coding	40	GC16M007619	6.92428
ZFP36L1	ZFP36 Ring Finger Protein Like 1	Protein Coding	44	GC14M068787	6.92307
CACNA1G	Calcium Voltage-Gated Channel Subunit Alpha1 G	Protein Coding	53	GC17P059069	6.92101
SUMO1P3	SUMO1 Pseudogene 3	Pseudogene	12	GC01P160317	6.91954
CUL3	Cullin 3	Protein Coding	49	GC02M224470	6.91879
BGLAP	Bone Gamma-Carboxyglutamate Protein	Protein Coding	44	GC01P156242	6.91663
ROCK2	Rho Associated Coiled-Coil Containing Protein Kinase 2	Protein Coding	49	GC02M011320	6.91645
CSNK1D	Casein Kinase 1 Delta	Protein Coding	51	GC17M082239	6.91453
IRS1	Insulin Receptor Substrate 1	Protein Coding	49	GC02M226731	6.91224
NOTCH3	Notch Receptor 3	Protein Coding	53	GC19M015159	6.90373
FUT4	Fucosyltransferase 4	Protein Coding	40	GC11P094544	6.90151
PRNCR1	Prostate Cancer Associated Non-Coding RNA 1	RNA Gene	14	GC08P127079	6.90068
E2F7	E2F Transcription Factor 7	Protein Coding	42	GC12M077021	6.90064
PLCG2	Phospholipase C Gamma 2	Protein Coding	54	GC16P081773	6.89849
DUSP1	Dual Specificity Phosphatase 1	Protein Coding	49	GC05M172768	6.89307
RBM5	RNA Binding Motif Protein 5	Protein Coding	41	GC03P050390	6.89287
KDM6A	Lysine Demethylase 6A	Protein Coding	50	GC0XP044873	6.88744
DACT1	Dishevelled Binding Antagonist Of Beta Catenin 1	Protein Coding	41	GC14P058633	6.88717
CRH	Corticotropin Releasing Hormone	Protein Coding	45	GC08M066176	6.88047
FUT3	Fucosyltransferase 3 (Lewis Blood Group)	Protein Coding	43	GC19M006255	6.8638
AGER	Advanced Glycosylation End-Product Specific Receptor	Protein Coding	49	GC06M032180	6.8497
MIR452	MicroRNA 452	RNA Gene	18	GC0XM151959	6.84666
BPIFA1	BPI Fold Containing Family A Member 1	Protein Coding	38	GC20P033235	6.84479
MIR506	MicroRNA 506	RNA Gene	16	GC0XM147230	6.83979
FNIP1	Folliculin Interacting Protein 1	Protein Coding	40	GC05M131641	6.83767
MIR1207	MicroRNA 1207	RNA Gene	18	GC08P128049	6.83751
PTH	Parathyroid Hormone	Protein Coding	48	GC11M013492	6.82924
HDC	Histidine Decarboxylase	Protein Coding	47	GC15M050241	6.8257
WIF1	WNT Inhibitory Factor 1	Protein Coding	47	GC12M065050	6.82379
TMEM238L	Transmembrane Protein 238 Like	Protein Coding	18	GC17M010798	6.8174
VEGFB	Vascular Endothelial Growth Factor B	Protein Coding	47	GC11P064234	6.80578
LINC00668	Long Intergenic Non-Protein Coding RNA 668	RNA Gene	18	GC18M006922	6.80384
DVL2	Dishevelled Segment Polarity Protein 2	Protein Coding	47	GC17M007225	6.80041
NPM1	Nucleophosmin 1	Protein Coding	53	GC05P171387	6.7989
CYP1A2	Cytochrome P450 Family 1 Subfamily A Member 2	Protein Coding	48	GC15P074748	6.7948
HAGLROS	HAGLR Opposite Strand LncRNA	RNA Gene	16	GC02P176258	6.7932
WEE1	WEE1 G2 Checkpoint Kinase	Protein Coding	49	GC11P009573	6.78939
MIR219A1	MicroRNA 219a-1	RNA Gene	23	GC06P033207	6.78903
PLCG1	Phospholipase C Gamma 1	Protein Coding	50	GC20P041136	6.78633
COL18A1	Collagen Type XVIII Alpha 1 Chain	Protein Coding	49	GC21P045405	6.78613
TLR7	Toll Like Receptor 7	Protein Coding	50	GC0XP012867	6.77934
CALD1	Caldesmon 1	Protein Coding	45	GC07P134744	6.77259
MIR148B	MicroRNA 148b	RNA Gene	23	GC12P054337	6.7668
KLRK1	Killer Cell Lectin Like Receptor K1	Protein Coding	44	GC12M021843	6.76673
PCNA-AS1	PCNA Antisense RNA 1	RNA Gene	13	GC20P005119	6.7662
SIGLEC5	Sialic Acid Binding Ig Like Lectin 5	Protein Coding	43	GC19M068312	6.75989
COL17A1	Collagen Type XVII Alpha 1 Chain	Protein Coding	47	GC10M104031	6.75284
FBXO24	F-Box Protein 24	Protein Coding	36	GC07P100583	6.74958
RSF1	Remodeling And Spacing Factor 1	Protein Coding	37	GC11M097504	6.746
LINC01772	Long Intergenic Non-Protein Coding RNA 1772	RNA Gene	14	GC01P017892	6.73494
KMT2C	Lysine Methyltransferase 2C	Protein Coding	47	GC07M152134	6.73311
ALOX5	Arachidonate 5-Lipoxygenase	Protein Coding	50	GC10P045374	6.72798
SAPCD2	Suppressor APC Domain Containing 2	Protein Coding	34	GC09M137062	6.72678
ETV1	ETS Variant Transcription Factor 1	Protein Coding	48	GC07M013891	6.72544
F2R	Coagulation Factor II Thrombin Receptor	Protein Coding	50	GC05P076716	6.72532
RNF216	Ring Finger Protein 216	Protein Coding	44	GC07M005620	6.71424
GAB1	GRB2 Associated Binding Protein 1	Protein Coding	46	GC04P143336	6.71361
KLF5	KLF Transcription Factor 5	Protein Coding	47	GC13P073054	6.71359
PFKFB3	6-Phosphofructo-2-Kinase/Fructose-2,6-Biphosphatase 3	Protein Coding	48	GC10P006144	6.70915
TOE1	Target Of EGR1, Exonuclease	Protein Coding	41	GC01P045410	6.70324
SEC11A	SEC11 Homolog A, Signal Peptidase Complex Subunit	Protein Coding	41	GC15M084669	6.70046
ECRG4	ECRG4 Augurin Precursor	Protein Coding	34	GC02P106063	6.69795
MIR362	MicroRNA 362	RNA Gene	17	GC0XP050994	6.6976
LAPTM4B	Lysosomal Protein Transmembrane 4 Beta	Protein Coding	40	GC08P097775	6.69675
PRKCB	Protein Kinase C Beta	Protein Coding	50	GC16P024412	6.68896
LRP6	LDL Receptor Related Protein 6	Protein Coding	50	GC12M021873	6.68818
CRABP1	Cellular Retinoic Acid Binding Protein 1	Protein Coding	44	GC15P078340	6.67871
SELE	Selectin E	Protein Coding	48	GC01M169722	6.67267
POT1	Protection Of Telomeres 1	Protein Coding	44	GC07M124822	6.66329
FGF19	Fibroblast Growth Factor 19	Protein Coding	45	GC11M097243	6.65646
EMCN	Endomucin	Protein Coding	39	GC04M100395	6.6552
LEPR	Leptin Receptor	Protein Coding	53	GC01P065421	6.65023
PRSS58	Serine Protease 58	Protein Coding	35	GC07M142263	6.6483
XRCC6	X-Ray Repair Cross Complementing 6	Protein Coding	48	GC22P041676	6.64494
ARG1	Arginase 1	Protein Coding	52	GC06P131473	6.64352
UHRF1	Ubiquitin Like With PHD And Ring Finger Domains 1	Protein Coding	42	GC19P004986	6.64077
LINC00511	Long Intergenic Non-Protein Coding RNA 511	RNA Gene	19	GC17M072323	6.63433
TNXB	Tenascin XB	Protein Coding	46	GC06M069227	6.6272
PML	PML Nuclear Body Scaffold	Protein Coding	48	GC15P073994	6.62688
EGFLAM-AS1	EGFLAM Antisense RNA 1	RNA Gene	16	GC05M038426	6.62446
MIR654	MicroRNA 654	RNA Gene	19	GC14P110461	6.62084
PAK4	P21 (RAC1) Activated Kinase 4	Protein Coding	51	GC19P039125	6.61434
THY1	Thy-1 Cell Surface Antigen	Protein Coding	46	GC11M119417	6.60041
FLT3	Fms Related Receptor Tyrosine Kinase 3	Protein Coding	55	GC13M028003	6.59118
AGO2	Argonaute RISC Catalytic Component 2	Protein Coding	45	GC08M140522	6.59031
NGFR	Nerve Growth Factor Receptor	Protein Coding	50	GC17P049495	6.58813
GSDMB	Gasdermin B	Protein Coding	37	GC17M039904	6.58634
CXADR	CXADR Ig-Like Cell Adhesion Molecule	Protein Coding	46	GC21P017513	6.58235
CCKAR	Cholecystokinin A Receptor	Protein Coding	48	GC04M026483	6.58225
BCL7B	BAF Chromatin Remodeling Complex Subunit BCL7B	Protein Coding	39	GC07M073536	6.56918
PRKCE	Protein Kinase C Epsilon	Protein Coding	51	GC02P045651	6.5654
ZNF750	Zinc Finger Protein 750	Protein Coding	37	GC17M082829	6.56193
SFTPA1	Surfactant Protein A1	Protein Coding	46	GC10P094450	6.55887
CXCR5	C-X-C Motif Chemokine Receptor 5	Protein Coding	45	GC11P118928	6.55578
ARMC5	Armadillo Repeat Containing 5	Protein Coding	38	GC16P041974	6.55295
SMOC2	SPARC Related Modular Calcium Binding 2	Protein Coding	45	GC06P168441	6.55049
PDK1	Pyruvate Dehydrogenase Kinase 1	Protein Coding	49	GC02P172555	6.54744
HSF1	Heat Shock Transcription Factor 1	Protein Coding	48	GC08P144291	6.54286
CSK	C-Terminal Src Kinase	Protein Coding	50	GC15P074782	6.54211
LOXL2	Lysyl Oxidase Like 2	Protein Coding	50	GC08M023296	6.54043
COPS5	COP9 Signalosome Subunit 5	Protein Coding	44	GC08M067043	6.53854
MIR1228	MicroRNA 1228	RNA Gene	18	GC12P057194	6.53744
HYAL1	Hyaluronidase 1	Protein Coding	50	GC03M050299	6.53665
CYP27B1	Cytochrome P450 Family 27 Subfamily B Member 1	Protein Coding	48	GC12M057757	6.53365
MIR374A	MicroRNA 374a	RNA Gene	20	GC0XM074296	6.53292
CMIP	C-Maf Inducing Protein	Protein Coding	36	GC16P081445	6.53111
WNT7B	Wnt Family Member 7B	Protein Coding	45	GC22M045920	6.52978
ANKRD11	Ankyrin Repeat Domain Containing 11	Protein Coding	40	GC16M089267	6.52304
SLC26A4	Solute Carrier Family 26 Member 4	Protein Coding	45	GC07P107660	6.52073
CDH6	Cadherin 6	Protein Coding	45	GC05P031193	6.51734
MIR425	MicroRNA 425	RNA Gene	21	GC03M051372	6.51564
CISD2	CDGSH Iron Sulfur Domain 2	Protein Coding	43	GC04P102868	6.51556
TLR1	Toll Like Receptor 1	Protein Coding	50	GC04M038793	6.5141
MIR744	MicroRNA 744	RNA Gene	18	GC17P012081	6.5131
ANGPTL4	Angiopoietin Like 4	Protein Coding	47	GC19P008363	6.5068
EGLN2	Egl-9 Family Hypoxia Inducible Factor 2	Protein Coding	47	GC19P069803	6.49802
MT1DP	Metallothionein 1D, Pseudogene	Pseudogene	23	GC16P056643	6.49536
PRMT5	Protein Arginine Methyltransferase 5	Protein Coding	50	GC14M022920	6.49519
CEBPA	CCAAT Enhancer Binding Protein Alpha	Protein Coding	49	GC19M033299	6.4947
ACVR1	Activin A Receptor Type 1	Protein Coding	54	GC02M157736	6.49314
ENPP2	Ectonucleotide Pyrophosphatase/Phosphodiesterase 2	Protein Coding	48	GC08M119556	6.49116
BRDT	Bromodomain Testis Associated	Protein Coding	45	GC01P091949	6.48932
DGCR5	DiGeorge Syndrome Critical Region Gene 5	RNA Gene	22	GC22P039717	6.48414
GNB5	G Protein Subunit Beta 5	Protein Coding	46	GC15M119502	6.47977
BNIP3	BCL2 Interacting Protein 3	Protein Coding	43	GC10M131966	6.47963
TNS1	Tensin 1	Protein Coding	42	GC02M217799	6.47603
LINC00052	Long Intergenic Non-Protein Coding RNA 52	RNA Gene	22	GC15P087576	6.47552
CIP2A	Cellular Inhibitor Of PP2A	Protein Coding	36	GC03M108578	6.475
CTAG2	Cancer/Testis Antigen 2	Protein Coding	34	GC0XM154651	6.46912
LIN28B	Lin-28 Homolog B	Protein Coding	44	GC06P104947	6.46531
EXO1	Exonuclease 1	Protein Coding	45	GC01P241847	6.46398
GFRA1	GDNF Family Receptor Alpha 1	Protein Coding	49	GC10M116056	6.4607
XAF1	XIAP Associated Factor 1	Protein Coding	41	GC17P006757	6.45641
SEPTIN9	Septin 9	Protein Coding	40	GC17P077282	6.44858
SEMA4D	Semaphorin 4D	Protein Coding	50	GC09M089360	6.44729
LDHB	Lactate Dehydrogenase B	Protein Coding	50	GC12M021635	6.44417
P2RY1	Purinergic Receptor P2Y1	Protein Coding	50	GC03P152835	6.44239
SFRP4	Secreted Frizzled Related Protein 4	Protein Coding	47	GC07M037912	6.43582
HLA-E	Major Histocompatibility Complex, Class I, E	Protein Coding	44	GC06P087699	6.43164
LYVE1	Lymphatic Vessel Endothelial Hyaluronan Receptor 1	Protein Coding	46	GC11M011096	6.4306
MAP3K7	Mitogen-Activated Protein Kinase Kinase Kinase 7	Protein Coding	53	GC06M090513	6.42857
CEMIP	Cell Migration Inducing Hyaluronidase 1	Protein Coding	39	GC15P080779	6.42678
MAP3K14	Mitogen-Activated Protein Kinase Kinase Kinase 14	Protein Coding	47	GC17M045263	6.42238
BCR	BCR Activator Of RhoGEF And GTPase	Protein Coding	55	GC22P023179	6.4203
PARK7	Parkinsonism Associated Deglycase	Protein Coding	50	GC01P008121	6.40858
UTP6	UTP6 Small Subunit Processome Component	Protein Coding	40	GC17M031860	6.40462
HSD17B1	Hydroxysteroid 17-Beta Dehydrogenase 1	Protein Coding	44	GC17P058587	6.40457
G6PD	Glucose-6-Phosphate Dehydrogenase	Protein Coding	53	GC0XM154558	6.40347
MAD2L1	Mitotic Arrest Deficient 2 Like 1	Protein Coding	46	GC04M120055	6.3974
SFTPB	Surfactant Protein B	Protein Coding	47	GC02M085657	6.39143
ARHGAP6	Rho GTPase Activating Protein 6	Protein Coding	43	GC0XM012585	6.38851
XRCC5	X-Ray Repair Cross Complementing 5	Protein Coding	47	GC02P216107	6.38342
MDC1-AS1	MDC1 Antisense RNA 1	RNA Gene	15	GC06P087705	6.38307
PIN1	Peptidylprolyl Cis/Trans Isomerase, NIMA-Interacting 1	Protein Coding	50	GC19P009835	6.38126
TCN1	Transcobalamin 1	Protein Coding	44	GC11M096828	6.36737
EDNRA	Endothelin Receptor Type A	Protein Coding	52	GC04P147480	6.36667
MECOM	MDS1 And EVI1 Complex Locus	Protein Coding	50	GC03M169083	6.36651
IER3	Immediate Early Response 3	Protein Coding	42	GC06M030743	6.36366
CDC6	Cell Division Cycle 6	Protein Coding	48	GC17P040287	6.35615
PTPN13	Protein Tyrosine Phosphatase Non-Receptor Type 13	Protein Coding	47	GC04P086594	6.35591
SREBF1	Sterol Regulatory Element Binding Transcription Factor 1	Protein Coding	48	GC17M017810	6.35474
SLC5A5	Solute Carrier Family 5 Member 5	Protein Coding	47	GC19P069322	6.35418
HMGA1	High Mobility Group AT-Hook 1	Protein Coding	48	GC06P087865	6.35132
ATF3	Activating Transcription Factor 3	Protein Coding	47	GC01P212565	6.34926
EIF2AK3	Eukaryotic Translation Initiation Factor 2 Alpha Kinase 3	Protein Coding	51	GC02M088556	6.34806
SPN	Sialophorin	Protein Coding	42	GC16P029662	6.34677
EGR2	Early Growth Response 2	Protein Coding	49	GC10M062811	6.34312
RCC2	Regulator Of Chromosome Condensation 2	Protein Coding	41	GC01M017406	6.341
CSNK2A2	Casein Kinase 2 Alpha 2	Protein Coding	50	GC16M058157	6.3387
MIR340	MicroRNA 340	RNA Gene	20	GC05M180015	6.32646
AMFR	Autocrine Motility Factor Receptor	Protein Coding	44	GC16M056361	6.32311
OCA2	OCA2 Melanosomal Transmembrane Protein	Protein Coding	45	GC15M027754	6.3205
ARTN	Artemin	Protein Coding	44	GC01P043933	6.31805
B3GAT1	Beta-1,3-Glucuronyltransferase 1	Protein Coding	46	GC11M134378	6.31765
CD68	CD68 Molecule	Protein Coding	43	GC17P007579	6.31667
FTX	FTX Transcript, XIST Regulator	RNA Gene	22	GC0XM073946	6.31366
PRKCQ	Protein Kinase C Theta	Protein Coding	51	GC10M006557	6.31328
TCIM	Transcriptional And Immune Response Regulator	Protein Coding	33	GC08P040153	6.31226
LUC7L3	LUC7 Like 3 Pre-MRNA Splicing Factor	Protein Coding	40	GC17P050719	6.31135
S100A9	S100 Calcium Binding Protein A9	Protein Coding	46	GC01P153357	6.30838
TNFRSF10D	TNF Receptor Superfamily Member 10d	Protein Coding	44	GC08M023135	6.30328
CDC25C	Cell Division Cycle 25C	Protein Coding	50	GC05M138285	6.28429
TIGIT	T Cell Immunoreceptor With Ig And ITIM Domains	Protein Coding	43	GC03P114276	6.28329
VEZT	Vezatin, Adherens Junctions Transmembrane Protein	Protein Coding	36	GC12P095217	6.27907
NKD2	NKD Inhibitor Of WNT Signaling Pathway 2	Protein Coding	39	GC05P001008	6.27586
ATOH1	Atonal BHLH Transcription Factor 1	Protein Coding	39	GC04P093828	6.27502
WNT5B	Wnt Family Member 5B	Protein Coding	47	GC12P001529	6.26795
SMAD6	SMAD Family Member 6	Protein Coding	49	GC15P066702	6.2677
CRABP2	Cellular Retinoic Acid Binding Protein 2	Protein Coding	46	GC01M156701	6.26426
GATA6-AS1	GATA6 Antisense RNA 1 (Head To Head)	RNA Gene	18	GC18M025568	6.2635
ENAH	ENAH Actin Regulator	Protein Coding	44	GC01M225486	6.26349
UBAP1	Ubiquitin Associated Protein 1	Protein Coding	43	GC09P034179	6.26189
MIR136	MicroRNA 136	RNA Gene	22	GC14P110113	6.26173
ITGA2	Integrin Subunit Alpha 2	Protein Coding	49	GC05P052989	6.25189
BRD2	Bromodomain Containing 2	Protein Coding	47	GC06P087775	6.2397
EHF	ETS Homologous Factor	Protein Coding	41	GC11P034621	6.23211
BATF2	Basic Leucine Zipper ATF-Like Transcription Factor 2	Protein Coding	38	GC11M064987	6.23154
STK4	Serine/Threonine Kinase 4	Protein Coding	52	GC20P044966	6.2279
LRP5	LDL Receptor Related Protein 5	Protein Coding	52	GC11P068298	6.22752
SHBG	Sex Hormone Binding Globulin	Protein Coding	44	GC17P007613	6.22683
SLC9A3R1	SLC9A3 Regulator 1	Protein Coding	48	GC17P074749	6.21039
LINC00473	Long Intergenic Non-Protein Coding RNA 473	RNA Gene	23	GC06M165328	6.20464
SMARCD1	SWI/SNF Related, Matrix Associated, Actin Dependent Regulator Of Chromatin, Subfamily D, Member 1	Protein Coding	44	GC12P050085	6.20418
BMP7	Bone Morphogenetic Protein 7	Protein Coding	48	GC20M057168	6.19936
CKS1B	CDC28 Protein Kinase Regulatory Subunit 1B	Protein Coding	44	GC01P154974	6.19321
RRP1B	Ribosomal RNA Processing 1B	Protein Coding	40	GC21P043659	6.18557
ARHGAP26	Rho GTPase Activating Protein 26	Protein Coding	47	GC05P142770	6.18042
FABP4	Fatty Acid Binding Protein 4	Protein Coding	47	GC08M081478	6.17992
DAB2	DAB Adaptor Protein 2	Protein Coding	44	GC05M039371	6.17948
CPQ	Carboxypeptidase Q	Protein Coding	40	GC08P096645	6.17575
COL9A3	Collagen Type IX Alpha 3 Chain	Protein Coding	45	GC20P062816	6.17277
ADAM10	ADAM Metallopeptidase Domain 10	Protein Coding	55	GC15M058588	6.16572
MIR545	MicroRNA 545	RNA Gene	15	GC0XM074287	6.1647
MBD4	Methyl-CpG Binding Domain 4, DNA Glycosylase	Protein Coding	44	GC03M129430	6.16223
SCARB1	Scavenger Receptor Class B Member 1	Protein Coding	50	GC12M124776	6.15651
MAPK11	Mitogen-Activated Protein Kinase 11	Protein Coding	51	GC22M050263	6.15221
CCR5	C-C Motif Chemokine Receptor 5	Protein Coding	51	GC03P047182	6.1459
KRT4	Keratin 4	Protein Coding	44	GC12M052806	6.14529
MIR493	MicroRNA 493	RNA Gene	20	GC14P110453	6.14519
NOTCH4	Notch Receptor 4	Protein Coding	49	GC06M069238	6.14106
IL12A	Interleukin 12A	Protein Coding	46	GC03P159988	6.13394
CHFR	Checkpoint With Forkhead And Ring Finger Domains	Protein Coding	40	GC12M132822	6.13379
VTN	Vitronectin	Protein Coding	47	GC17M044982	6.13301
INTS7	Integrator Complex Subunit 7	Protein Coding	39	GC01M211940	6.12983
MIR216B	MicroRNA 216b	RNA Gene	18	GC02M056000	6.12873
SIRT3	Sirtuin 3	Protein Coding	50	GC11M000215	6.12246
RPS27	Ribosomal Protein S27	Protein Coding	45	GC01P153991	6.12162
SLPI	Secretory Leukocyte Peptidase Inhibitor	Protein Coding	42	GC20M045252	6.12154
RUNX2	RUNX Family Transcription Factor 2	Protein Coding	49	GC06P088004	6.11846
LINC00628	Long Intergenic Non-Protein Coding RNA 628	RNA Gene	16	GC01M204520	6.11744
CUL1	Cullin 1	Protein Coding	45	GC07P148697	6.11423
SFTPD	Surfactant Protein D	Protein Coding	47	GC10M079937	6.11275
POLR1C	RNA Polymerase I And III Subunit C	Protein Coding	47	GC06P087985	6.10505
SPINT1	Serine Peptidase Inhibitor, Kunitz Type 1	Protein Coding	44	GC15P040844	6.10117
SIRT6	Sirtuin 6	Protein Coding	47	GC19M004174	6.10039
FLI1	Fli-1 Proto-Oncogene, ETS Transcription Factor	Protein Coding	50	GC11P128686	6.09802
PHLDA1	Pleckstrin Homology Like Domain Family A Member 1	Protein Coding	37	GC12M076025	6.09615
VCAM1	Vascular Cell Adhesion Molecule 1	Protein Coding	48	GC01P100719	6.09562
ROBO1	Roundabout Guidance Receptor 1	Protein Coding	47	GC03M078597	6.09161
HOPX	HOP Homeobox	Protein Coding	37	GC04M056647	6.08976
ICAM2	Intercellular Adhesion Molecule 2	Protein Coding	48	GC17M064002	6.08285
MYD88	MYD88 Innate Immune Signal Transduction Adaptor	Protein Coding	51	GC03P038144	6.08252
CYP24A1	Cytochrome P450 Family 24 Subfamily A Member 1	Protein Coding	48	GC20M054153	6.08086
CCL3	C-C Motif Chemokine Ligand 3	Protein Coding	44	GC17M036088	6.07675
SCTR	Secretin Receptor	Protein Coding	46	GC02M119439	6.07638
PRDX2	Peroxiredoxin 2	Protein Coding	48	GC19M012796	6.07581
SLC17A9	Solute Carrier Family 17 Member 9	Protein Coding	41	GC20P062952	6.07196
CXCL14	C-X-C Motif Chemokine Ligand 14	Protein Coding	39	GC05M135617	6.07117
IKBKG	Inhibitor Of Nuclear Factor Kappa B Kinase Regulatory Subunit Gamma	Protein Coding	51	GC0XP154541	6.0704
JUNB	JunB Proto-Oncogene, AP-1 Transcription Factor Subunit	Protein Coding	44	GC19P012791	6.06303
SAT1	Spermidine/Spermine N1-Acetyltransferase 1	Protein Coding	46	GC0XP023784	6.06256
EIF2D	Eukaryotic Translation Initiation Factor 2D	Protein Coding	36	GC01M206571	6.05548
TRRAP	Transformation/Transcription Domain Associated Protein	Protein Coding	48	GC07P098877	6.04787
HTRA1	HtrA Serine Peptidase 1	Protein Coding	48	GC10P122461	6.04599
HSD3B2	Hydroxy-Delta-5-Steroid Dehydrogenase, 3 Beta- And Steroid Delta-Isomerase 2	Protein Coding	47	GC01P119414	6.04539
MECP2	Methyl-CpG Binding Protein 2	Protein Coding	48	GC0XM154021	6.04489
MYH9	Myosin Heavy Chain 9	Protein Coding	51	GC22M036281	6.03888
KMT2A	Lysine Methyltransferase 2A	Protein Coding	50	GC11P118436	6.03791
CYP26A1	Cytochrome P450 Family 26 Subfamily A Member 1	Protein Coding	45	GC10P093073	6.03748
BCAR1	BCAR1 Scaffold Protein, Cas Family Member	Protein Coding	46	GC16M075228	6.03012
GTF2IRD1	GTF2I Repeat Domain Containing 1	Protein Coding	44	GC07P075830	6.02767
TLR5	Toll Like Receptor 5	Protein Coding	48	GC01M223109	6.0265
PLEC	Plectin	Protein Coding	45	GC08M144240	6.0244
NCOR2	Nuclear Receptor Corepressor 2	Protein Coding	46	GC12M124324	6.02417
NOS3	Nitric Oxide Synthase 3	Protein Coding	52	GC07P150990	6.02381
DLL3	Delta Like Canonical Notch Ligand 3	Protein Coding	46	GC19P039498	6.02212
LATS2	Large Tumor Suppressor Kinase 2	Protein Coding	47	GC13M020973	6.01768
SPEN	Spen Family Transcriptional Repressor	Protein Coding	44	GC01P015843	6.01726
SERPINB2	Serpin Family B Member 2	Protein Coding	45	GC18P063871	6.01548
PRLR	Prolactin Receptor	Protein Coding	52	GC05M035048	6.01526
ZFP36	ZFP36 Ring Finger Protein	Protein Coding	43	GC19P039406	6.01338
DDIT3	DNA Damage Inducible Transcript 3	Protein Coding	48	GC12M057516	5.9978
TFR2	Transferrin Receptor 2	Protein Coding	48	GC07M100620	5.99431
STAT6	Signal Transducer And Activator Of Transcription 6	Protein Coding	53	GC12M057095	5.99151
TIAM1	TIAM Rac1 Associated GEF 1	Protein Coding	47	GC21M031118	5.9843
TGM1	Transglutaminase 1	Protein Coding	48	GC14M024249	5.98009
MOK	MOK Protein Kinase	Protein Coding	40	GC14M102214	5.97504
FBLN1	Fibulin 1	Protein Coding	47	GC22P045502	5.97312
PPY	Pancreatic Polypeptide	Protein Coding	42	GC17M043940	5.96754
MDC1	Mediator Of DNA Damage Checkpoint 1	Protein Coding	43	GC06M069131	5.9619
DDX5	DEAD-Box Helicase 5	Protein Coding	48	GC17M064498	5.96
STAR	Steroidogenic Acute Regulatory Protein	Protein Coding	47	GC08M038145	5.95675
LINC00460	Long Intergenic Non-Protein Coding RNA 460	RNA Gene	18	GC13P106376	5.95651
CCL4	C-C Motif Chemokine Ligand 4	Protein Coding	45	GC17P036103	5.95561
PLAAT1	Phospholipase A And Acyltransferase 1	Protein Coding	33	GC03P193244	5.95542
NR1H2	Nuclear Receptor Subfamily 1 Group H Member 2	Protein Coding	49	GC19P050329	5.9549
LTF	Lactotransferrin	Protein Coding	48	GC03M046435	5.95458
KDM5B	Lysine Demethylase 5B	Protein Coding	47	GC01M202696	5.95346
SPDEF	SAM Pointed Domain Containing ETS Transcription Factor	Protein Coding	41	GC06M069336	5.95266
CD48	CD48 Molecule	Protein Coding	43	GC01M160648	5.95253
TK1	Thymidine Kinase 1	Protein Coding	48	GC17M078175	5.95041
BRMS1	BRMS1 Transcriptional Repressor And Anoikis Regulator	Protein Coding	38	GC11M097113	5.94884
MIR660	MicroRNA 660	RNA Gene	16	GC0XP050013	5.94331
MEF2D	Myocyte Enhancer Factor 2D	Protein Coding	48	GC01M156463	5.94301
WNT4	Wnt Family Member 4	Protein Coding	49	GC01M022190	5.94225
MLNR	Motilin Receptor	Protein Coding	43	GC13P049220	5.94218
APOE	Apolipoprotein E	Protein Coding	53	GC19P069967	5.94032
KRT16	Keratin 16	Protein Coding	45	GC17M041609	5.9376
NMB	Neuromedin B	Protein Coding	43	GC15M084655	5.93191
FANCG	FA Complementation Group G	Protein Coding	45	GC09M035073	5.93088
GDNF	Glial Cell Derived Neurotrophic Factor	Protein Coding	52	GC05M037812	5.9291
MAML1	Mastermind Like Transcriptional Coactivator 1	Protein Coding	41	GC05P179732	5.92331
MIR433	MicroRNA 433	RNA Gene	24	GC14P110108	5.91351
CXCL11	C-X-C Motif Chemokine Ligand 11	Protein Coding	46	GC04M076033	5.91132
NACC1	Nucleus Accumbens Associated 1	Protein Coding	43	GC19P014524	5.89957
UBD	Ubiquitin D	Protein Coding	40	GC06M069076	5.89515
MIR326	MicroRNA 326	RNA Gene	23	GC11M075335	5.89392
BUD23	BUD23 RRNA Methyltransferase And Ribosome Maturation Factor	Protein Coding	40	GC07P075790	5.89234
FNDC3B	Fibronectin Type III Domain Containing 3B	Protein Coding	37	GC03P172039	5.89205
FOXD2-AS1	FOXD2 Adjacent Opposite Strand RNA 1	RNA Gene	18	GC01M047432	5.89067
WNT11	Wnt Family Member 11	Protein Coding	46	GC11M076186	5.88501
ADA	Adenosine Deaminase	Protein Coding	54	GC20M044620	5.88358
YWHAE	Tyrosine 3-Monooxygenase/Tryptophan 5-Monooxygenase Activation Protein Epsilon	Protein Coding	52	GC17M004893	5.88316
IST1	IST1 Factor Associated With ESCRT-III	Protein Coding	41	GC16P072183	5.88153
TAP1	Transporter 1, ATP Binding Cassette Subfamily B Member	Protein Coding	50	GC06M069271	5.8809
IL5	Interleukin 5	Protein Coding	48	GC05M132541	5.87971
OTUD5	OTU Deubiquitinase 5	Protein Coding	41	GC0XM048922	5.87748
CD14	CD14 Molecule	Protein Coding	50	GC05M140631	5.87516
SARNP	SAP Domain Containing Ribonucleoprotein	Protein Coding	38	GC12M055752	5.87293
MIR99B	MicroRNA 99b	RNA Gene	23	GC19P051692	5.87133
CASC11	Cancer Susceptibility 11	RNA Gene	17	GC08M132181	5.87055
KLK10	Kallikrein Related Peptidase 10	Protein Coding	42	GC19M051012	5.86877
ANAPC1	Anaphase Promoting Complex Subunit 1	Protein Coding	44	GC02M111611	5.86861
MRTFA	Myocardin Related Transcription Factor A	Protein Coding	43	GC22M060093	5.86691
ATP7A	ATPase Copper Transporting Alpha	Protein Coding	48	GC0XP078001	5.86616
FOXA2	Forkhead Box A2	Protein Coding	47	GC20M022581	5.86594
TMEFF2	Transmembrane Protein With EGF Like And Two Follistatin Like Domains 2	Protein Coding	42	GC02M191950	5.86242
GSK3A	Glycogen Synthase Kinase 3 Alpha	Protein Coding	52	GC19M067912	5.86169
ACP3	Acid Phosphatase 3	Protein Coding	44	GC03P134656	5.85661
CBX4	Chromobox 4	Protein Coding	43	GC17M079833	5.85616
OCLN	Occludin	Protein Coding	47	GC05P069492	5.85087
BBC3	BCL2 Binding Component 3	Protein Coding	42	GC19M047220	5.84582
SLC2A3	Solute Carrier Family 2 Member 3	Protein Coding	50	GC12M007919	5.84396
CTHRC1	Collagen Triple Helix Repeat Containing 1	Protein Coding	44	GC08P103371	5.84004
PES1	Pescadillo Ribosomal Biogenesis Factor 1	Protein Coding	40	GC22M030576	5.83494
TP53BP1	Tumor Protein P53 Binding Protein 1	Protein Coding	46	GC15M043403	5.83041
ADAM12	ADAM Metallopeptidase Domain 12	Protein Coding	48	GC10M126012	5.83039
PRC1	Protein Regulator Of Cytokinesis 1	Protein Coding	42	GC15M090966	5.83023
TLE3	TLE Family Member 3, Transcriptional Corepressor	Protein Coding	46	GC15M070047	5.82924
SSTR5	Somatostatin Receptor 5	Protein Coding	47	GC16P001072	5.82882
OR3A4P	Olfactory Receptor Family 3 Subfamily A Member 4 Pseudogene	Pseudogene	22	GC17P004412	5.82826
NR4A1	Nuclear Receptor Subfamily 4 Group A Member 1	Protein Coding	50	GC12P052022	5.82168
REV3L	REV3 Like, DNA Directed Polymerase Zeta Catalytic Subunit	Protein Coding	48	GC06M111299	5.82008
PPP2CA	Protein Phosphatase 2 Catalytic Subunit Alpha	Protein Coding	52	GC05M134194	5.81994
COL4A2	Collagen Type IV Alpha 2 Chain	Protein Coding	49	GC13P110305	5.81637
MIR345	MicroRNA 345	RNA Gene	21	GC14P100307	5.81284
ZNF180	Zinc Finger Protein 180	Protein Coding	37	GC19M067980	5.81118
BTC	Betacellulin	Protein Coding	47	GC04M074744	5.80947
IRF2BP2	Interferon Regulatory Factor 2 Binding Protein 2	Protein Coding	38	GC01M234604	5.80902
FNDC5	Fibronectin Type III Domain Containing 5	Protein Coding	40	GC01M033216	5.80547
ITGAM	Integrin Subunit Alpha M	Protein Coding	50	GC16P041958	5.80442
VPS37A	VPS37A Subunit Of ESCRT-I	Protein Coding	45	GC08P017246	5.80141
DEFB4A	Defensin Beta 4A	Protein Coding	37	GC08P007895	5.79986
MYOF	Myoferlin	Protein Coding	47	GC10M093306	5.79666
PTK6	Protein Tyrosine Kinase 6	Protein Coding	50	GC20M063528	5.79422
PBOV1	Prostate And Breast Cancer Overexpressed 1	Protein Coding	30	GC06M138215	5.79281
MIR383	MicroRNA 383	RNA Gene	19	GC08M014853	5.79138
MIR125B2	MicroRNA 125b-2	RNA Gene	23	GC21P016590	5.79083
PLK3	Polo Like Kinase 3	Protein Coding	48	GC01P045377	5.78001
STAT5B	Signal Transducer And Activator Of Transcription 5B	Protein Coding	52	GC17M042199	5.77601
AKR7L	Aldo-Keto Reductase Family 7 Like (Gene/Pseudogene)	Protein Coding	31	GC01M019265	5.77416
CD55	CD55 Molecule (Cromer Blood Group)	Protein Coding	51	GC01P207321	5.77152
VTRNA2-1	Vault RNA 2-1	RNA Gene	17	GC05M136081	5.7687
SFRP5	Secreted Frizzled Related Protein 5	Protein Coding	41	GC10M097766	5.76078
MST1	Macrophage Stimulating 1	Protein Coding	48	GC03M049683	5.75955
SNCG	Synuclein Gamma	Protein Coding	44	GC10P093503	5.75095
ACY1	Aminoacylase 1	Protein Coding	48	GC03P051983	5.74888
THBS4	Thrombospondin 4	Protein Coding	45	GC05P079991	5.74776
KLK7	Kallikrein Related Peptidase 7	Protein Coding	44	GC19M068278	5.74479
LINC00963	Long Intergenic Non-Protein Coding RNA 963	RNA Gene	17	GC09P129483	5.7415
CDK7	Cyclin Dependent Kinase 7	Protein Coding	49	GC05P069403	5.73772
GUCY2C	Guanylate Cyclase 2C	Protein Coding	47	GC12M014612	5.73757
AHCY	Adenosylhomocysteinase	Protein Coding	52	GC20M034890	5.73562
LARP1	La Ribonucleoprotein 1, Translational Regulator	Protein Coding	42	GC05P154682	5.73399
F5	Coagulation Factor V	Protein Coding	50	GC01M169511	5.73371
ZBTB7A	Zinc Finger And BTB Domain Containing 7A	Protein Coding	40	GC19M006067	5.73323
CDC25B	Cell Division Cycle 25B	Protein Coding	48	GC20P004400	5.72552
LATS1	Large Tumor Suppressor Kinase 1	Protein Coding	46	GC06M149658	5.72411
FOXK2	Forkhead Box K2	Protein Coding	40	GC17P082519	5.72224
KRT1	Keratin 1	Protein Coding	49	GC12M052674	5.71896
DCLK1	Doublecortin Like Kinase 1	Protein Coding	48	GC13M035768	5.71632
MIR124-3	MicroRNA 124-3	RNA Gene	19	GC20P063429	5.71265
LINC01194	Long Intergenic Non-Protein Coding RNA 1194	RNA Gene	18	GC05P012578	5.70617
RAD52	RAD52 Homolog, DNA Repair Protein	Protein Coding	43	GC12M000912	5.70533
CSNK1E	Casein Kinase 1 Epsilon	Protein Coding	50	GC22M059593	5.70265
SKP1	S-Phase Kinase Associated Protein 1	Protein Coding	47	GC05M134148	5.69117
TTK	TTK Protein Kinase	Protein Coding	51	GC06P080003	5.6885
PPP2R2A	Protein Phosphatase 2 Regulatory Subunit Balpha	Protein Coding	45	GC08P026292	5.68666
BAZ1B	Bromodomain Adjacent To Zinc Finger Domain 1B	Protein Coding	43	GC07M073440	5.68645
DDX3X	DEAD-Box Helicase 3 X-Linked	Protein Coding	49	GC0XP041333	5.68426
SERPINF1	Serpin Family F Member 1	Protein Coding	48	GC17P001761	5.68342
BHLHA15	Basic Helix-Loop-Helix Family Member A15	Protein Coding	38	GC07P098211	5.68231
CAMK2G	Calcium/Calmodulin Dependent Protein Kinase II Gamma	Protein Coding	50	GC10M073812	5.67628
AKR1C1	Aldo-Keto Reductase Family 1 Member C1	Protein Coding	45	GC10P004963	5.67196
APC2	APC Regulator Of WNT Signaling Pathway 2	Protein Coding	43	GC19P003292	5.671
AFAP1	Actin Filament Associated Protein 1	Protein Coding	40	GC04M007758	5.67064
GP5	Glycoprotein V Platelet	Protein Coding	43	GC03M194395	5.66401
HIPK2	Homeodomain Interacting Protein Kinase 2	Protein Coding	48	GC07M139561	5.66319
IFNGR1	Interferon Gamma Receptor 1	Protein Coding	53	GC06M137197	5.66168
MAT2A	Methionine Adenosyltransferase 2A	Protein Coding	50	GC02P085861	5.66151
TJP1	Tight Junction Protein 1	Protein Coding	46	GC15M029699	5.66118
CRTC3	CREB Regulated Transcription Coactivator 3	Protein Coding	41	GC15P090529	5.65334
PRODH	Proline Dehydrogenase 1	Protein Coding	48	GC22M018912	5.65239
BIN1	Bridging Integrator 1	Protein Coding	48	GC02M127048	5.65083
DOT1L	DOT1 Like Histone Lysine Methyltransferase	Protein Coding	48	GC19P003331	5.64772
TOB1	Transducer Of ERBB2, 1	Protein Coding	43	GC17M050862	5.64761
SLC3A2	Solute Carrier Family 3 Member 2	Protein Coding	45	GC11P062856	5.64721
GAS6-AS1	GAS6 Antisense RNA 1	RNA Gene	20	GC13P113815	5.64682
RBL1	RB Transcriptional Corepressor Like 1	Protein Coding	44	GC20M036996	5.64593
MIR184	MicroRNA 184	RNA Gene	25	GC15P079209	5.64404
BHLHE40	Basic Helix-Loop-Helix Family Member E40	Protein Coding	43	GC03P004980	5.64403
STRAP	Serine/Threonine Kinase Receptor Associated Protein	Protein Coding	41	GC12P015882	5.64194
EPHB1	EPH Receptor B1	Protein Coding	51	GC03P134795	5.64192
DELEC1	Deleted In Esophageal Cancer 1	RNA Gene	26	GC09P119272	5.63889
MIR376A1	MicroRNA 376a-1	RNA Gene	17	GC14P110436	5.63791
BCL2L2	BCL2 Like 2	Protein Coding	45	GC14P033738	5.63548
BCOR	BCL6 Corepressor	Protein Coding	45	GC0XM040049	5.63535
IKBKE	Inhibitor Of Nuclear Factor Kappa B Kinase Subunit Epsilon	Protein Coding	47	GC01P206470	5.63469
NLK	Nemo Like Kinase	Protein Coding	47	GC17P057740	5.62939
DYNLRB1	Dynein Light Chain Roadblock-Type 1	Protein Coding	40	GC20P034771	5.62662
TNFSF15	TNF Superfamily Member 15	Protein Coding	46	GC09M114784	5.62595
FZD1	Frizzled Class Receptor 1	Protein Coding	50	GC07P091264	5.61601
LIN28A	Lin-28 Homolog A	Protein Coding	42	GC01P026410	5.6154
SHMT1	Serine Hydroxymethyltransferase 1	Protein Coding	48	GC17M026307	5.61396
MIR542	MicroRNA 542	RNA Gene	19	GC0XM134638	5.61203
KISS1	KiSS-1 Metastasis Suppressor	Protein Coding	44	GC01M204190	5.61172
AIRE	Autoimmune Regulator	Protein Coding	45	GC21P044285	5.6104
CD22	CD22 Molecule	Protein Coding	49	GC19P035319	5.60338
IL13RA2	Interleukin 13 Receptor Subunit Alpha 2	Protein Coding	42	GC0XM115003	5.59379
PVALB	Parvalbumin	Protein Coding	43	GC22M036800	5.58937
NRP2	Neuropilin 2	Protein Coding	48	GC02P205681	5.58824
PRDM16	PR/SET Domain 16	Protein Coding	48	GC01P004195	5.58755
DCN	Decorin	Protein Coding	50	GC12M091140	5.5851
MFN2	Mitofusin 2	Protein Coding	50	GC01P011980	5.58348
ARHGEF2	Rho/Rac Guanine Nucleotide Exchange Factor 2	Protein Coding	48	GC01M155946	5.58171
MDH2	Malate Dehydrogenase 2	Protein Coding	51	GC07P076048	5.58116
MACC1-AS1	MACC1 Antisense RNA 1	RNA Gene	16	GC07P020183	5.57743
TNFRSF1B	TNF Receptor Superfamily Member 1B	Protein Coding	52	GC01P012272	5.57731
PPP1R1B	Protein Phosphatase 1 Regulatory Inhibitor Subunit 1B	Protein Coding	45	GC17P039626	5.57621
SNHG14	Small Nucleolar RNA Host Gene 14	RNA Gene	19	GC15P043951	5.57275
ITPR3	Inositol 1,4,5-Trisphosphate Receptor Type 3	Protein Coding	48	GC06P033620	5.5715
ACTR2	Actin Related Protein 2	Protein Coding	46	GC02P065227	5.56979
HIC1	HIC ZBTB Transcriptional Repressor 1	Protein Coding	43	GC17P002054	5.56977
THRB	Thyroid Hormone Receptor Beta	Protein Coding	51	GC03M024117	5.56947
ACKR3	Atypical Chemokine Receptor 3	Protein Coding	44	GC02P236537	5.56944
MIR363	MicroRNA 363	RNA Gene	18	GC0XM134322	5.56788
FAM107A	Family With Sequence Similarity 107 Member A	Protein Coding	38	GC03M058753	5.56737
MIR154	MicroRNA 154	RNA Gene	22	GC14P110426	5.56354
DLGAP5	DLG Associated Protein 5	Protein Coding	42	GC14M055148	5.55963
LINC01133	Long Intergenic Non-Protein Coding RNA 1133	RNA Gene	17	GC01P159959	5.5571
RBBP4	RB Binding Protein 4, Chromatin Remodeling Factor	Protein Coding	47	GC01P032651	5.55467
CLIP2	CAP-Gly Domain Containing Linker Protein 2	Protein Coding	42	GC07P074289	5.55322
ST6GAL1	ST6 Beta-Galactoside Alpha-2,6-Sialyltransferase 1	Protein Coding	47	GC03P186930	5.55193
MIR671	MicroRNA 671	RNA Gene	19	GC07P151238	5.55106
CNC2	Carney Complex Type 2, Multiple Neoplasia And Lentiginosis	Genetic Locus	4	GC02U990267	5.55095
ADAMTS9-AS2	ADAMTS9 Antisense RNA 2	RNA Gene	20	GC03P064671	5.54943
UPK1A	Uroplakin 1A	Protein Coding	39	GC19P069632	5.54805
CD40LG	CD40 Ligand	Protein Coding	52	GC0XP136649	5.54796
NR5A1	Nuclear Receptor Subfamily 5 Group A Member 1	Protein Coding	52	GC09M124481	5.54746
LOXL4	Lysyl Oxidase Like 4	Protein Coding	47	GC10M098247	5.54668
LGALS8	Galectin 8	Protein Coding	43	GC01P236518	5.54565
TTC7A	Tetratricopeptide Repeat Domain 7A	Protein Coding	41	GC02P046906	5.5448
SELENBP1	Selenium Binding Protein 1	Protein Coding	46	GC01M151364	5.54391
COL1A2	Collagen Type I Alpha 2 Chain	Protein Coding	50	GC07P094394	5.54242
PRSS21	Serine Protease 21	Protein Coding	44	GC16P012715	5.54232
CEL	Carboxyl Ester Lipase	Protein Coding	48	GC09P133061	5.54163
PPP1R10	Protein Phosphatase 1 Regulatory Subunit 10	Protein Coding	41	GC06M030600	5.54102
RPS6	Ribosomal Protein S6	Protein Coding	45	GC09M019375	5.53859
MUC12	Mucin 12, Cell Surface Associated	Protein Coding	36	GC07P100969	5.5331
MIR409	MicroRNA 409	RNA Gene	20	GC14P110446	5.52795
HDAC6	Histone Deacetylase 6	Protein Coding	56	GC0XP048801	5.52294
MACC1	MET Transcriptional Regulator MACC1	Protein Coding	38	GC07M020140	5.51916
HJV	Hemojuvelin BMP Co-Receptor	Protein Coding	45	GC01M147081	5.51914
IRF4	Interferon Regulatory Factor 4	Protein Coding	45	GC06P000391	5.51852
GJB6	Gap Junction Protein Beta 6	Protein Coding	45	GC13M020221	5.51736
BLZF1	Basic Leucine Zipper Nuclear Factor 1	Protein Coding	41	GC01P169367	5.51585
ECM1	Extracellular Matrix Protein 1	Protein Coding	47	GC01P150508	5.51329
CASP2	Caspase 2	Protein Coding	50	GC07P148816	5.50773
IL3	Interleukin 3	Protein Coding	47	GC05P132060	5.50251
ERVH48-1	Endogenous Retrovirus Group 48 Member 1	Protein Coding	18	GC21M042916	5.50242
LINC00901	Long Intergenic Non-Protein Coding RNA 901	RNA Gene	16	GC03P116911	5.50242
UROD	Uroporphyrinogen Decarboxylase	Protein Coding	48	GC01P045401	5.50226
DAB2IP	DAB2 Interacting Protein	Protein Coding	43	GC09P121566	5.4992
KDM4B	Lysine Demethylase 4B	Protein Coding	48	GC19P004969	5.49838
POFUT1	Protein O-Fucosyltransferase 1	Protein Coding	46	GC20P032207	5.49639
TNFSF11	TNF Superfamily Member 11	Protein Coding	54	GC13P042562	5.49382
INHBA-AS1	INHBA Antisense RNA 1	RNA Gene	18	GC07P041693	5.49325
WNT7A	Wnt Family Member 7A	Protein Coding	51	GC03M021328	5.49217
RPL34-DT	RPL34 Divergent Transcript	RNA Gene	19	GC04M108539	5.48668
RARG	Retinoic Acid Receptor Gamma	Protein Coding	50	GC12M053210	5.48563
RAP1A	RAP1A, Member Of RAS Oncogene Family	Protein Coding	47	GC01P111542	5.4843
EPHB6	EPH Receptor B6	Protein Coding	48	GC07P148810	5.48183
H3-7	H3.7 Histone (Putative)	Protein Coding	19	GC01M144036	5.4765
ZEB2-AS1	ZEB2 Antisense RNA 1	RNA Gene	22	GC02P144519	5.46938
MSN	Moesin	Protein Coding	50	GC0XP065588	5.46746
IGFBP1	Insulin Like Growth Factor Binding Protein 1	Protein Coding	46	GC07P047917	5.46675
IRF2	Interferon Regulatory Factor 2	Protein Coding	45	GC04M184387	5.46505
GLI3	GLI Family Zinc Finger 3	Protein Coding	51	GC07M041960	5.46487
PLD1	Phospholipase D1	Protein Coding	51	GC03M171600	5.46422
FZD2	Frizzled Class Receptor 2	Protein Coding	51	GC17P044557	5.46261
EPHA4	EPH Receptor A4	Protein Coding	54	GC02M221418	5.46223
MIR339	MicroRNA 339	RNA Gene	22	GC07M001022	5.45902
AKR1C3	Aldo-Keto Reductase Family 1 Member C3	Protein Coding	48	GC10P005035	5.45812
HSP90B1	Heat Shock Protein 90 Beta Family Member 1	Protein Coding	50	GC12P103930	5.45689
CD63	CD63 Molecule	Protein Coding	45	GC12M055725	5.45455
CPOX	Coproporphyrinogen Oxidase	Protein Coding	47	GC03M098576	5.45154
ALPP	Alkaline Phosphatase, Placental	Protein Coding	47	GC02P232378	5.44617
TGM2	Transglutaminase 2	Protein Coding	50	GC20M038127	5.44558
RBPJ	Recombination Signal Binding Protein For Immunoglobulin Kappa J Region	Protein Coding	49	GC04P026105	5.44295
SLC29A1	Solute Carrier Family 29 Member 1 (Augustine Blood Group)	Protein Coding	51	GC06P044219	5.43911
GIPC3	GIPC PDZ Domain Containing Family Member 3	Protein Coding	38	GC19P003585	5.43885
CHD8	Chromodomain Helicase DNA Binding Protein 8	Protein Coding	44	GC14M021385	5.43645
EPHA7	EPH Receptor A7	Protein Coding	50	GC06M093240	5.43587
TRERNA1	Translation Regulatory Long Non-Coding RNA 1	RNA Gene	16	GC20M050040	5.4318
MAP3K20-AS1	MAP3K20 Antisense RNA 1	RNA Gene	19	GC02M173168	5.43142
FAM168A	Family With Sequence Similarity 168 Member A	Protein Coding	36	GC11M073400	5.43128
PRKCH	Protein Kinase C Eta	Protein Coding	52	GC14P061187	5.43039
TBK1	TANK Binding Kinase 1	Protein Coding	51	GC12P064451	5.43038
PDX1	Pancreatic And Duodenal Homeobox 1	Protein Coding	48	GC13P027921	5.42962
EREG	Epiregulin	Protein Coding	45	GC04P074366	5.42806
PSEN2	Presenilin 2	Protein Coding	52	GC01P226870	5.42766
TMEM51-AS1	TMEM51 Antisense RNA 1	RNA Gene	20	GC01M015111	5.4245
PARN	Poly(A)-Specific Ribonuclease	Protein Coding	48	GC16M014435	5.42276
AGTR1	Angiotensin II Receptor Type 1	Protein Coding	54	GC03P148697	5.41631
MAP1LC3B	Microtubule Associated Protein 1 Light Chain 3 Beta	Protein Coding	44	GC16P087384	5.4112
DNAJA3	DnaJ Heat Shock Protein Family (Hsp40) Member A3	Protein Coding	43	GC16P004425	5.40585
SLC19A1	Solute Carrier Family 19 Member 1	Protein Coding	48	GC21M045493	5.40568
NUMA1	Nuclear Mitotic Apparatus Protein 1	Protein Coding	47	GC11M072002	5.39776
BDNF	Brain Derived Neurotrophic Factor	Protein Coding	52	GC11M027654	5.39763
C9orf78	Chromosome 9 Open Reading Frame 78	Protein Coding	36	GC09M129827	5.39652
GINS2	GINS Complex Subunit 2	Protein Coding	41	GC16M085676	5.39643
HNRNPU	Heterogeneous Nuclear Ribonucleoprotein U	Protein Coding	45	GC01M244844	5.39444
AGR2	Anterior Gradient 2, Protein Disulphide Isomerase Family Member	Protein Coding	42	GC07M017093	5.3868
PSPN	Persephin	Protein Coding	40	GC19M006375	5.38655
MIR199A2	MicroRNA 199a-2	RNA Gene	23	GC01M172235	5.38321
TUBB3	Tubulin Beta 3 Class III	Protein Coding	51	GC16P091470	5.38301
MAGI1	Membrane Associated Guanylate Kinase, WW And PDZ Domain Containing 1	Protein Coding	41	GC03M065330	5.38231
PTPRH	Protein Tyrosine Phosphatase Receptor Type H	Protein Coding	42	GC19M055181	5.3819
CRYAB	Crystallin Alpha B	Protein Coding	48	GC11M111908	5.38108
MIR299	MicroRNA 299	RNA Gene	19	GC14P110428	5.38092
PIK3CD	Phosphatidylinositol-4,5-Bisphosphate 3-Kinase Catalytic Subunit Delta	Protein Coding	56	GC01P009629	5.37897
FOXCUT	FOXC1 Upstream Transcript	RNA Gene	15	GC06P001604	5.3774
MIR29B2	MicroRNA 29b-2	RNA Gene	20	GC01M207806	5.3762
SLC25A47	Solute Carrier Family 25 Member 47	Protein Coding	37	GC14P100323	5.37507
SLC2A2	Solute Carrier Family 2 Member 2	Protein Coding	52	GC03M170996	5.37231
ADAM15	ADAM Metallopeptidase Domain 15	Protein Coding	47	GC01P155050	5.36884
HES1	Hes Family BHLH Transcription Factor 1	Protein Coding	46	GC03P194136	5.36857
NAA40	N-Alpha-Acetyltransferase 40, NatD Catalytic Subunit	Protein Coding	37	GC11P063938	5.35879
PGK1	Phosphoglycerate Kinase 1	Protein Coding	52	GC0XP078002	5.35737
[truncated: 9,367 more rows]
