# Supplementary material for: Huangqi fuling decoction inhibits the invasion and metastasis of gastric cancer via the TNF signaling pathway
Source: Research Square preprint supplement (doi:10.21203/rs.3.rs-5906521/v1), 2025-04-28
Supplement: Supplementary file 3 [file b887db8836777e69012caa3b.xlsx]

## Sheet: HQ
MOLID	ingredients	Abbreviated ID	Target gene	Target gene
MOL000417	Calycosin	HQ1	Nitric oxide synthase, inducible	NOS2
MOL000417	Calycosin	HQ1	Prostaglandin G/H synthase 1	PTGS1
MOL000417	Calycosin	HQ1	Estrogen receptor	ESR1
MOL000417	Calycosin	HQ1	Androgen receptor	AR
MOL000417	Calycosin	HQ1	Peroxisome proliferator activated receptor gamma	PPARG
MOL000417	Calycosin	HQ1	Prostaglandin G/H synthase 2	PTGS2
MOL000417	Calycosin	HQ1	Retinoic acid receptor RXR-alpha	RXRA
MOL000417	Calycosin	HQ1	CGMP-inhibited 3',5'-cyclic phosphodiesterase A	PDE3A
MOL000417	Calycosin	HQ1	Estrogen receptor beta	ESR2
MOL000417	Calycosin	HQ1	Dipeptidyl peptidase IV	DPP4
MOL000417	Calycosin	HQ1	Mitogen-activated protein kinase 14	MAPK14
MOL000417	Calycosin	HQ1	Glycogen synthase kinase-3 beta	GSK3B
MOL000417	Calycosin	HQ1	Heat shock protein HSP 90	HSP83
MOL000417	Calycosin	HQ1	Cell division protein kinase 2	CDK2
MOL000417	Calycosin	HQ1	Serine/threonine-protein kinase Chk1	CHEK1
MOL000417	Calycosin	HQ1	Nitric oxide synthase, inducible	NOS2
MOL000417	Calycosin	HQ1	Prostaglandin G/H synthase 1	PTGS1
MOL000417	Calycosin	HQ1	Estrogen receptor	ESR1
MOL000417	Calycosin	HQ1	Androgen receptor	AR
MOL000417	Calycosin	HQ1	Peroxisome proliferator activated receptor gamma	PPARG
MOL000417	Calycosin	HQ1	Prostaglandin G/H synthase 2	PTGS2
MOL000417	Calycosin	HQ1	Retinoic acid receptor RXR-alpha	RXRA
MOL000417	Calycosin	HQ1	CGMP-inhibited 3',5'-cyclic phosphodiesterase A	PDE3A
MOL000417	Calycosin	HQ1	Estrogen receptor beta	ESR2
MOL000417	Calycosin	HQ1	Dipeptidyl peptidase IV	DPP4
MOL000417	Calycosin	HQ1	Mitogen-activated protein kinase 14	MAPK14
MOL000417	Calycosin	HQ1	Glycogen synthase kinase-3 beta	GSK3B
MOL000417	Calycosin	HQ1	Heat shock protein HSP 90	HSP83
MOL000417	Calycosin	HQ1	Cell division protein kinase 2	CDK2
MOL000417	Calycosin	HQ1	Serine/threonine-protein kinase Chk1	CHEK1
MOL000422	kaempferol	HQ2	Nitric oxide synthase, inducible	NOS2
MOL000422	kaempferol	HQ2	Prostaglandin G/H synthase 1	PTGS1
MOL000422	kaempferol	HQ2	Androgen receptor	AR
MOL000422	kaempferol	HQ2	Peroxisome proliferator activated receptor gamma	PPARG
MOL000422	kaempferol	HQ2	Prostaglandin G/H synthase 2	PTGS2
MOL000422	kaempferol	HQ2	Heat shock protein HSP 90	HSP83
MOL000422	kaempferol	HQ2	Phosphatidylinositol-4,5-bisphosphate 3-kinase catalytic subunit, gamma isoform	PIK3CG
MOL000422	kaempferol	HQ2	mRNA of PKA Catalytic Subunit C-alpha	PRKACA
MOL000422	kaempferol	HQ2	Nuclear receptor coactivator 2	NCOA2
MOL000422	kaempferol	HQ2	Dipeptidyl peptidase IV	DPP4
MOL000422	kaempferol	HQ2	Trypsin-1	PRSS1
MOL000422	kaempferol	HQ2	Progesterone receptor	PGR
MOL000422	kaempferol	HQ2	Muscarinic acetylcholine receptor M1	CHRM1
MOL000422	kaempferol	HQ2	Nitric-oxide synthase, endothelial	NOS3
MOL000422	kaempferol	HQ2	Gamma-aminobutyric-acid receptor alpha-2 subunit	GABRA2
MOL000422	kaempferol	HQ2	Acetylcholinesterase	ACHE
MOL000422	kaempferol	HQ2	Sodium-dependent noradrenaline transporter	SLC6A2
MOL000422	kaempferol	HQ2	Muscarinic acetylcholine receptor M2	CHRM2
MOL000422	kaempferol	HQ2	Alpha-1B adrenergic receptor	ADRA1B
MOL000422	kaempferol	HQ2	Gamma-aminobutyric acid receptor subunit alpha-1	GABRA1
MOL000422	kaempferol	HQ2	DNA topoisomerase II	TOP2
MOL000422	kaempferol	HQ2	Coagulation factor VII	F7
MOL000422	kaempferol	HQ2	Calmodulin	CALM
MOL000422	kaempferol	HQ2	Transcription factor p65	RELA
MOL000422	kaempferol	HQ2	Inhibitor of nuclear factor kappa-B kinase subunit beta	IKBKB
MOL000422	kaempferol	HQ2	RAC-alpha serine/threonine-protein kinase	AKT1
MOL000422	kaempferol	HQ2	Apoptosis regulator Bcl-2	BCL2
MOL000422	kaempferol	HQ2	Apoptosis regulator BAX	BAX
MOL000422	kaempferol	HQ2	Tumor necrosis factor	TNF
MOL000422	kaempferol	HQ2	Activator of 90 kDa heat shock protein ATPase homolog 1	AHSA1
MOL000422	kaempferol	HQ2	Caspase-3	CASP3
MOL000422	kaempferol	HQ2	Mitogen-activated protein kinase 8	MAPK8
MOL000422	kaempferol	HQ2	Xanthine dehydrogenase/oxidase	XDH
MOL000422	kaempferol	HQ2	Interstitial collagenase	MMP1
MOL000422	kaempferol	HQ2	Signal transducer and activator of transcription 1-alpha/beta	STAT1
MOL000422	kaempferol	HQ2	Cell division control protein 2 homolog	CDC2
MOL000422	kaempferol	HQ2	Peroxisome proliferator-activated receptor gamma	PPARG
MOL000422	kaempferol	HQ2	Heme oxygenase 1	HMOX1
MOL000422	kaempferol	HQ2	Cytochrome P450 3A4	CYP3A4
MOL000422	kaempferol	HQ2	Cytochrome P450 1A2	CYP1A2
MOL000422	kaempferol	HQ2	Cytochrome P450 1A1	CYP1A1
MOL000422	kaempferol	HQ2	Intercellular adhesion molecule 1	ICAM1
MOL000422	kaempferol	HQ2	E-selectin	SELE
MOL000422	kaempferol	HQ2	Vascular cell adhesion protein 1	VCAM1
MOL000422	kaempferol	HQ2	Nuclear receptor subfamily 1 group I member 2	NR1I2
MOL000422	kaempferol	HQ2	Cytochrome P450 1B1	CYP1B1
MOL000422	kaempferol	HQ2	Arachidonate 5-lipoxygenase	ALOX5
MOL000422	kaempferol	HQ2	Hyaluronan synthase 2	HAS2
MOL000422	kaempferol	HQ2	Glutathione S-transferase P	GSTP1
MOL000422	kaempferol	HQ2	Aryl hydrocarbon receptor	AHR
MOL000422	kaempferol	HQ2	26S proteasome non-ATPase regulatory subunit 3	PSMD3
MOL000422	kaempferol	HQ2	Solute carrier family 2, facilitated glucose transporter member 4	SLC2A4
MOL000422	kaempferol	HQ2	Nuclear receptor subfamily 1 group I member 3	NR1I3
MOL000422	kaempferol	HQ2	Insulin receptor	INSR
MOL000422	kaempferol	HQ2	Type I iodothyronine deiodinase	DIO1
MOL000422	kaempferol	HQ2	Serine/threonine-protein phosphatase 2B catalytic subunit alpha isoform	PPP3CA
MOL000422	kaempferol	HQ2	Peroxidase C1A	PRXC1A
MOL000422	kaempferol	HQ2	Glutathione S-transferase Mu 1	GSTM1
MOL000422	kaempferol	HQ2	Glutathione S-transferase Mu 2	GSTM2
MOL000422	kaempferol	HQ2	Aldo-keto reductase family 1 member C3	AKR1C3
MOL000422	kaempferol	HQ2	Antileukoproteinase	SLPI
MOL000432	linolenic acid	HQ3	Prostaglandin G/H synthase 1	PTGS1
MOL000432	linolenic acid	HQ3	Prostaglandin G/H synthase 2	PTGS2
MOL000432	linolenic acid	HQ3	Retinoic acid receptor RXR-alpha	RXRA
MOL000432	linolenic acid	HQ3	Nuclear receptor coactivator 2	NCOA2
MOL000432	linolenic acid	HQ3	Retinoic acid receptor RXR-gamma	RXRG
MOL000432	linolenic acid	HQ3	Transient receptor potential cation channel subfamily V member 1	TRPV1
MOL000432	linolenic acid	HQ3	Transcription factor p65	RELA
MOL000432	linolenic acid	HQ3	Proliferating cell nuclear antigen	PCNA
MOL000432	linolenic acid	HQ3	Myc proto-oncogene protein	MYC
MOL000432	linolenic acid	HQ3	Calmodulin	CALM
MOL000432	linolenic acid	HQ3	Hepatocyte nuclear factor 4-alpha	HNF4A
MOL000432	linolenic acid	HQ3	Mitochondrial uncoupling protein 2	UCP2
MOL000432	linolenic acid	HQ3	Hepatocyte nuclear factor 1-alpha	HNF1A
MOL000432	linolenic acid	HQ3	Actin, cytoplasmic 1	ACTB
MOL000432	linolenic acid	HQ3	Tripartite motif-containing protein 26	TRIM26
MOL000433	FA	HQ4	Cell division protein kinase 2	CDK2
MOL000433	FA	HQ4	Glycogen synthase kinase-3 beta	GSK3B
MOL000436	(Z)-1-(2,4-dihydroxyphenyl)-3-(4-hydroxyphenyl)prop-2-en-1-one	HQ5	Nitric oxide synthase, inducible	NOS2
MOL000436	(Z)-1-(2,4-dihydroxyphenyl)-3-(4-hydroxyphenyl)prop-2-en-1-one	HQ5	Prostaglandin G/H synthase 1	PTGS1
MOL000436	(Z)-1-(2,4-dihydroxyphenyl)-3-(4-hydroxyphenyl)prop-2-en-1-one	HQ5	Estrogen receptor	ESR1
MOL000436	(Z)-1-(2,4-dihydroxyphenyl)-3-(4-hydroxyphenyl)prop-2-en-1-one	HQ5	Peroxisome proliferator activated receptor gamma	PPARG
MOL000436	(Z)-1-(2,4-dihydroxyphenyl)-3-(4-hydroxyphenyl)prop-2-en-1-one	HQ5	Prostaglandin G/H synthase 2	PTGS2
MOL000436	(Z)-1-(2,4-dihydroxyphenyl)-3-(4-hydroxyphenyl)prop-2-en-1-one	HQ5	Carbonic anhydrase II	CA2
MOL000436	(Z)-1-(2,4-dihydroxyphenyl)-3-(4-hydroxyphenyl)prop-2-en-1-one	HQ5	Beta-2 adrenergic receptor	ADRB2
MOL000436	(Z)-1-(2,4-dihydroxyphenyl)-3-(4-hydroxyphenyl)prop-2-en-1-one	HQ5	Gamma-aminobutyric acid receptor subunit alpha-1	GABRA1
MOL000436	(Z)-1-(2,4-dihydroxyphenyl)-3-(4-hydroxyphenyl)prop-2-en-1-one	HQ5	Mitogen-activated protein kinase 14	MAPK14
MOL000436	(Z)-1-(2,4-dihydroxyphenyl)-3-(4-hydroxyphenyl)prop-2-en-1-one	HQ5	Glycogen synthase kinase-3 beta	GSK3B
MOL000436	(Z)-1-(2,4-dihydroxyphenyl)-3-(4-hydroxyphenyl)prop-2-en-1-one	HQ5	Heat shock protein HSP 90	HSP83
MOL000436	(Z)-1-(2,4-dihydroxyphenyl)-3-(4-hydroxyphenyl)prop-2-en-1-one	HQ5	Cell division protein kinase 2	CDK2
MOL000436	(Z)-1-(2,4-dihydroxyphenyl)-3-(4-hydroxyphenyl)prop-2-en-1-one	HQ5	Phosphatidylinositol-4,5-bisphosphate 3-kinase catalytic subunit, gamma isoform	PIK3CG
MOL000436	(Z)-1-(2,4-dihydroxyphenyl)-3-(4-hydroxyphenyl)prop-2-en-1-one	HQ5	Beta-lactamase	AMPC
MOL000436	(Z)-1-(2,4-dihydroxyphenyl)-3-(4-hydroxyphenyl)prop-2-en-1-one	HQ5	Amine oxidase [flavin-containing] B	MAOB
MOL000436	(Z)-1-(2,4-dihydroxyphenyl)-3-(4-hydroxyphenyl)prop-2-en-1-one	HQ5	Serine/threonine-protein kinase Chk1	CHEK1
MOL000436	(Z)-1-(2,4-dihydroxyphenyl)-3-(4-hydroxyphenyl)prop-2-en-1-one	HQ5	mRNA of PKA Catalytic Subunit C-alpha	PRKACA
MOL000436	(Z)-1-(2,4-dihydroxyphenyl)-3-(4-hydroxyphenyl)prop-2-en-1-one	HQ5	Proto-oncogene serine/threonine-protein kinase Pim-1	PIM1
MOL000436	(Z)-1-(2,4-dihydroxyphenyl)-3-(4-hydroxyphenyl)prop-2-en-1-one	HQ5	Cyclin-A2	CCNA2
MOL000436	(Z)-1-(2,4-dihydroxyphenyl)-3-(4-hydroxyphenyl)prop-2-en-1-one	HQ5	Nuclear receptor coactivator 2	NCOA2
MOL000436	(Z)-1-(2,4-dihydroxyphenyl)-3-(4-hydroxyphenyl)prop-2-en-1-one	HQ5	cAMP-dependent protein kinase inhibitor alpha	PKIA
MOL000131	EIC	HQ6	Prostaglandin G/H synthase 1	PTGS1
MOL000131	EIC	HQ6	Prostaglandin G/H synthase 2	PTGS2
MOL000131	EIC	HQ6	Retinoic acid receptor RXR-alpha	RXRA
MOL000131	EIC	HQ6	Nuclear receptor coactivator 2	NCOA2
MOL000131	EIC	HQ6	Sodium-dependent noradrenaline transporter	SLC6A2
MOL000131	EIC	HQ6	Ig gamma-1 chain C region	IGHG1
MOL000131	EIC	HQ6	Gamma-aminobutyric-acid receptor alpha-2 subunit	GABRA2
MOL000131	EIC	HQ6	Gamma-aminobutyric acid receptor subunit alpha-1	GABRA1
MOL000131	EIC	HQ6	Cytochrome P450-cam	JVH1_9171
MOL000131	EIC	HQ6	Transient receptor potential cation channel subfamily V member 1	TRPV1
MOL000131	EIC	HQ6	Muscarinic acetylcholine receptor M1	CHRM1
MOL000131	EIC	HQ6	Muscarinic acetylcholine receptor M2	CHRM2
MOL000131	EIC	HQ6	Gamma-aminobutyric-acid receptor subunit alpha-6	GABRA6
MOL000239	Jaranol	HQ7	Nitric oxide synthase, inducible	NOS2
MOL000239	Jaranol	HQ7	Prostaglandin G/H synthase 1	PTGS1
MOL000239	Jaranol	HQ7	Androgen receptor	AR
MOL000239	Jaranol	HQ7	Sodium channel protein type 5 subunit alpha	SCN5A
MOL000239	Jaranol	HQ7	Prostaglandin G/H synthase 2	PTGS2
MOL000239	Jaranol	HQ7	Estrogen receptor beta	ESR2
MOL000239	Jaranol	HQ7	Dipeptidyl peptidase IV	DPP4
MOL000239	Jaranol	HQ7	Heat shock protein HSP 90	HSP83
MOL000239	Jaranol	HQ7	Cell division protein kinase 2	CDK2
MOL000239	Jaranol	HQ7	Serine/threonine-protein kinase Chk1	CHEK1
MOL000239	Jaranol	HQ7	Trypsin-1	PRSS1
MOL000239	Jaranol	HQ7	Nuclear receptor coactivator 2	NCOA2
MOL000239	Jaranol	HQ7	Calmodulin	CALM
MOL000295	alexandrin	HQ8	Prostaglandin G/H synthase 2	PTGS2
MOL000295	alexandrin	HQ8	Progesterone receptor	PGR
MOL000295	alexandrin	HQ8	Mineralocorticoid receptor	NR3C2
MOL000295	alexandrin	HQ8	Nuclear receptor coactivator 2	NCOA2
MOL000295	alexandrin	HQ8	Nuclear receptor coactivator 1	NCOA1
MOL000295	alexandrin	HQ8	Alcohol dehydrogenase 1C	ADH1C
MOL000295	alexandrin	HQ8	Trypsin-3	PRSS3
MOL000295	alexandrin	HQ8	DNA topoisomerase II	TOP2
MOL000295	alexandrin	HQ8	Prostaglandin G/H synthase 1	PTGS1
MOL000295	alexandrin	HQ8	Glycogen phosphorylase, muscle form	PYGM
MOL000295	alexandrin	HQ8	Heat shock protein HSP 90	HSP83
MOL000295	alexandrin	HQ8	Phosphatidylinositol-4,5-bisphosphate 3-kinase catalytic subunit, gamma isoform	PIK3CG
MOL000296	hederagenin	HQ9	Progesterone receptor	PGR
MOL000296	hederagenin	HQ9	Nuclear receptor coactivator 2	NCOA2
MOL000296	hederagenin	HQ9	Muscarinic acetylcholine receptor M3	CHRM3
MOL000296	hederagenin	HQ9	Muscarinic acetylcholine receptor M1	CHRM1
MOL000296	hederagenin	HQ9	Gamma-aminobutyric-acid receptor alpha-2 subunit	GABRA2
MOL000296	hederagenin	HQ9	Gamma-aminobutyric-acid receptor alpha-3 subunit	GABRA3
MOL000296	hederagenin	HQ9	Muscarinic acetylcholine receptor M2	CHRM2
MOL000296	hederagenin	HQ9	Alpha-1B adrenergic receptor	ADRA1B
MOL000296	hederagenin	HQ9	Gamma-aminobutyric acid receptor subunit alpha-1	GABRA1
MOL000296	hederagenin	HQ9	Glutamate receptor 2	GRIA2
MOL000296	hederagenin	HQ9	Gamma-aminobutyric-acid receptor subunit alpha-6	GABRA6
MOL000296	hederagenin	HQ9	Gamma-aminobutyric-acid receptor alpha-5 subunit	GABRA5
MOL000296	hederagenin	HQ9	Ig gamma-1 chain C region	IGHG1
MOL000296	hederagenin	HQ9	Alcohol dehydrogenase 1B	ADH1B
MOL000296	hederagenin	HQ9	Alcohol dehydrogenase 1C	ADH1C
MOL000296	hederagenin	HQ9	Prostaglandin G/H synthase 1	PTGS1
MOL000296	hederagenin	HQ9	Sodium channel protein type 5 subunit alpha	SCN5A
MOL000296	hederagenin	HQ9	Prostaglandin G/H synthase 2	PTGS2
MOL000296	hederagenin	HQ9	Retinoic acid receptor RXR-alpha	RXRA
MOL000296	hederagenin	HQ9	CGMP-inhibited 3',5'-cyclic phosphodiesterase A	PDE3A
MOL000296	hederagenin	HQ9	Sodium-dependent noradrenaline transporter	SLC6A2
MOL000296	hederagenin	HQ9	Cytochrome P450-cam	JVH1_9171
MOL000354	isorhamnetin	HQ10	Nitric oxide synthase, inducible	NOS2
MOL000354	isorhamnetin	HQ10	Prostaglandin G/H synthase 1	PTGS1
MOL000354	isorhamnetin	HQ10	Estrogen receptor	ESR1
MOL000354	isorhamnetin	HQ10	Androgen receptor	AR
MOL000354	isorhamnetin	HQ10	Peroxisome proliferator activated receptor gamma	PPARG
MOL000354	isorhamnetin	HQ10	Prostaglandin G/H synthase 2	PTGS2
MOL000354	isorhamnetin	HQ10	mRNA of Protein-tyrosine phosphatase, non-receptor type 1	PTPN22
MOL000354	isorhamnetin	HQ10	Estrogen receptor beta	ESR2
MOL000354	isorhamnetin	HQ10	Dipeptidyl peptidase IV	DPP4
MOL000354	isorhamnetin	HQ10	Mitogen-activated protein kinase 14	MAPK14
MOL000354	isorhamnetin	HQ10	Glycogen synthase kinase-3 beta	GSK3B
MOL000354	isorhamnetin	HQ10	Heat shock protein HSP 90	HSP83
MOL000354	isorhamnetin	HQ10	Cell division protein kinase 2	CDK2
MOL000354	isorhamnetin	HQ10	Phosphatidylinositol-4,5-bisphosphate 3-kinase catalytic subunit, gamma isoform	PIK3CG
MOL000354	isorhamnetin	HQ10	mRNA of PKA Catalytic Subunit C-alpha	PRKACA
MOL000354	isorhamnetin	HQ10	Trypsin-1	PRSS1
MOL000354	isorhamnetin	HQ10	Proto-oncogene serine/threonine-protein kinase Pim-1	PIM1
MOL000354	isorhamnetin	HQ10	Cyclin-A2	CCNA2
MOL000354	isorhamnetin	HQ10	Nuclear receptor coactivator 2	NCOA2
MOL000354	isorhamnetin	HQ10	Calmodulin	CALM
MOL000354	isorhamnetin	HQ10	Glycogen phosphorylase, muscle form	PYGM
MOL000354	isorhamnetin	HQ10	Peroxisome proliferator activated receptor delta	PPARD
MOL000354	isorhamnetin	HQ10	Serine/threonine-protein kinase Chk1	CHEK1
MOL000354	isorhamnetin	HQ10	Nuclear receptor coactivator 1	NCOA1
MOL000354	isorhamnetin	HQ10	Coagulation factor VII	F7
MOL000354	isorhamnetin	HQ10	Nitric-oxide synthase, endothelial	NOS3
MOL000354	isorhamnetin	HQ10	Acetylcholinesterase	ACHE
MOL000354	isorhamnetin	HQ10	Gamma-aminobutyric acid receptor subunit alpha-1	GABRA1
MOL000354	isorhamnetin	HQ10	Amine oxidase [flavin-containing] B	MAOB
MOL000354	isorhamnetin	HQ10	Glutamate receptor 2	GRIA2
MOL000354	isorhamnetin	HQ10	Cytochrome P450-cam	JVH1_9171
MOL000354	isorhamnetin	HQ10	Transcription factor p65	RELA
MOL000354	isorhamnetin	HQ10	Xanthine dehydrogenase/oxidase	XDH
MOL000354	isorhamnetin	HQ10	Neutrophil cytosol factor 1	NCF1
MOL000354	isorhamnetin	HQ10	Oxidized low-density lipoprotein receptor 1	OLR1
MOL000371	3,9-di-O-methylnissolin	HQ11	Nitric oxide synthase, inducible	NOS2
MOL000371	3,9-di-O-methylnissolin	HQ11	Prostaglandin G/H synthase 1	PTGS1
MOL000371	3,9-di-O-methylnissolin	HQ11	Muscarinic acetylcholine receptor M3	CHRM3
MOL000371	3,9-di-O-methylnissolin	HQ11	Muscarinic acetylcholine receptor M1	CHRM1
MOL000371	3,9-di-O-methylnissolin	HQ11	Estrogen receptor	ESR1
MOL000371	3,9-di-O-methylnissolin	HQ11	Beta-1 adrenergic receptor	ADRB1
MOL000371	3,9-di-O-methylnissolin	HQ11	Sodium channel protein type 5 subunit alpha	SCN5A
MOL000371	3,9-di-O-methylnissolin	HQ11	Prostaglandin G/H synthase 2	PTGS2
MOL000371	3,9-di-O-methylnissolin	HQ11	Nitric-oxide synthase, endothelial	NOS3
MOL000371	3,9-di-O-methylnissolin	HQ11	5-hydroxytryptamine receptor 3A	HTR3A
MOL000371	3,9-di-O-methylnissolin	HQ11	Alpha-2C adrenergic receptor	ADRA2C
MOL000371	3,9-di-O-methylnissolin	HQ11	Retinoic acid receptor RXR-alpha	RXRA
MOL000371	3,9-di-O-methylnissolin	HQ11	Acetylcholinesterase	ACHE
MOL000371	3,9-di-O-methylnissolin	HQ11	CGMP-inhibited 3',5'-cyclic phosphodiesterase A	PDE3A
MOL000371	3,9-di-O-methylnissolin	HQ11	Alpha-1B adrenergic receptor	ADRA1B
MOL000371	3,9-di-O-methylnissolin	HQ11	Beta-2 adrenergic receptor	ADRB2
MOL000371	3,9-di-O-methylnissolin	HQ11	Alpha-1D adrenergic receptor	ADRA1D
MOL000371	3,9-di-O-methylnissolin	HQ11	Mu-type opioid receptor	OPRM1
MOL000371	3,9-di-O-methylnissolin	HQ11	Gamma-aminobutyric acid receptor subunit alpha-1	GABRA1
MOL000371	3,9-di-O-methylnissolin	HQ11	Trypsin-1	PRSS1
MOL000371	3,9-di-O-methylnissolin	HQ11	Nuclear receptor coactivator 2	NCOA2
MOL000371	3,9-di-O-methylnissolin	HQ11	Calmodulin	CALM
MOL000378	7-O-methylisomucronulatol	HQ12	Nitric oxide synthase, inducible	NOS2
MOL000378	7-O-methylisomucronulatol	HQ12	Prostaglandin G/H synthase 1	PTGS1
MOL000378	7-O-methylisomucronulatol	HQ12	Dopamine D1 receptor	DRD1
MOL000378	7-O-methylisomucronulatol	HQ12	Muscarinic acetylcholine receptor M3	CHRM3
MOL000378	7-O-methylisomucronulatol	HQ12	Potassium voltage-gated channel subfamily H member 2	KCNH2
MOL000378	7-O-methylisomucronulatol	HQ12	Muscarinic acetylcholine receptor M1	CHRM1
MOL000378	7-O-methylisomucronulatol	HQ12	Estrogen receptor	ESR1
MOL000378	7-O-methylisomucronulatol	HQ12	Androgen receptor	AR
MOL000378	7-O-methylisomucronulatol	HQ12	Beta-1 adrenergic receptor	ADRB1
MOL000378	7-O-methylisomucronulatol	HQ12	Sodium channel protein type 5 subunit alpha	SCN5A
MOL000378	7-O-methylisomucronulatol	HQ12	Peroxisome proliferator activated receptor gamma	PPARG
MOL000378	7-O-methylisomucronulatol	HQ12	Coagulation factor Xa	F10
MOL000378	7-O-methylisomucronulatol	HQ12	Muscarinic acetylcholine receptor M5	CHRM5
MOL000378	7-O-methylisomucronulatol	HQ12	Prostaglandin G/H synthase 2	PTGS2
MOL000378	7-O-methylisomucronulatol	HQ12	Nitric oxide synthase, inducible	NOS2
MOL000378	7-O-methylisomucronulatol	HQ12	Prostaglandin G/H synthase 1	PTGS1
MOL000378	7-O-methylisomucronulatol	HQ12	Dopamine D1 receptor	DRD1
MOL000378	7-O-methylisomucronulatol	HQ12	Muscarinic acetylcholine receptor M3	CHRM3
MOL000378	7-O-methylisomucronulatol	HQ12	Potassium voltage-gated channel subfamily H member 2	KCNH2
MOL000378	7-O-methylisomucronulatol	HQ12	Muscarinic acetylcholine receptor M1	CHRM1
MOL000378	7-O-methylisomucronulatol	HQ12	Estrogen receptor	ESR1
MOL000378	7-O-methylisomucronulatol	HQ12	Androgen receptor	AR
MOL000378	7-O-methylisomucronulatol	HQ12	Beta-1 adrenergic receptor	ADRB1
MOL000378	7-O-methylisomucronulatol	HQ12	Sodium channel protein type 5 subunit alpha	SCN5A
MOL000378	7-O-methylisomucronulatol	HQ12	Peroxisome proliferator activated receptor gamma	PPARG
MOL000378	7-O-methylisomucronulatol	HQ12	Coagulation factor Xa	F10
MOL000378	7-O-methylisomucronulatol	HQ12	Muscarinic acetylcholine receptor M5	CHRM5
MOL000378	7-O-methylisomucronulatol	HQ12	Prostaglandin G/H synthase 2	PTGS2
MOL000378	7-O-methylisomucronulatol	HQ12	Gamma-aminobutyric acid receptor subunit alpha-1	GABRA1
MOL000378	7-O-methylisomucronulatol	HQ12	Dipeptidyl peptidase IV	DPP4
MOL000378	7-O-methylisomucronulatol	HQ12	Mitogen-activated protein kinase 14	MAPK14
MOL000378	7-O-methylisomucronulatol	HQ12	Glycogen synthase kinase-3 beta	GSK3B
MOL000378	7-O-methylisomucronulatol	HQ12	Heat shock protein HSP 90	HSP83
MOL000378	7-O-methylisomucronulatol	HQ12	Cell division protein kinase 2	CDK2
MOL000378	7-O-methylisomucronulatol	HQ12	Serine/threonine-protein kinase Chk1	CHEK1
MOL000378	7-O-methylisomucronulatol	HQ12	mRNA of PKA Catalytic Subunit C-alpha	PRKACA
MOL000378	7-O-methylisomucronulatol	HQ12	Retinoic acid receptor RXR-beta	RXRB
MOL000378	7-O-methylisomucronulatol	HQ12	Trypsin-1	PRSS1
MOL000378	7-O-methylisomucronulatol	HQ12	Proto-oncogene serine/threonine-protein kinase Pim-1	PIM1
MOL000378	7-O-methylisomucronulatol	HQ12	Cyclin-A2	CCNA2
MOL000378	7-O-methylisomucronulatol	HQ12	Nuclear receptor coactivator 2	NCOA2
MOL000378	7-O-methylisomucronulatol	HQ12	Calcium-activated potassium channel subunit alpha 1	KCNMA1
MOL000378	7-O-methylisomucronulatol	HQ12	Calmodulin	CALM
MOL000379	9,10-dimethoxypterocarpan-3-O-β-D-glucoside	HQ13	Prostaglandin G/H synthase 2	PTGS2
MOL000379	9,10-dimethoxypterocarpan-3-O-β-D-glucoside	HQ13	DNA topoisomerase II	TOP2
MOL000379	9,10-dimethoxypterocarpan-3-O-β-D-glucoside	HQ13	Nuclear receptor coactivator 2	NCOA2
MOL000380	(6aR,11aR)-9,10-dimethoxy-6a,11a-dihydro-6H-benzofurano[3,2-c]chromen-3-ol	HQ14	Nitric oxide synthase, inducible	NOS2
MOL000380	(6aR,11aR)-9,10-dimethoxy-6a,11a-dihydro-6H-benzofurano[3,2-c]chromen-3-ol	HQ14	Prostaglandin G/H synthase 1	PTGS1
MOL000380	(6aR,11aR)-9,10-dimethoxy-6a,11a-dihydro-6H-benzofurano[3,2-c]chromen-3-ol	HQ14	Muscarinic acetylcholine receptor M3	CHRM3
MOL000380	(6aR,11aR)-9,10-dimethoxy-6a,11a-dihydro-6H-benzofurano[3,2-c]chromen-3-ol	HQ14	Muscarinic acetylcholine receptor M1	CHRM1
MOL000380	(6aR,11aR)-9,10-dimethoxy-6a,11a-dihydro-6H-benzofurano[3,2-c]chromen-3-ol	HQ14	Estrogen receptor	ESR1
MOL000380	(6aR,11aR)-9,10-dimethoxy-6a,11a-dihydro-6H-benzofurano[3,2-c]chromen-3-ol	HQ14	Sodium channel protein type 5 subunit alpha	SCN5A
MOL000380	(6aR,11aR)-9,10-dimethoxy-6a,11a-dihydro-6H-benzofurano[3,2-c]chromen-3-ol	HQ14	Prostaglandin G/H synthase 2	PTGS2
MOL000380	(6aR,11aR)-9,10-dimethoxy-6a,11a-dihydro-6H-benzofurano[3,2-c]chromen-3-ol	HQ14	5-hydroxytryptamine receptor 3A	HTR3A
MOL000380	(6aR,11aR)-9,10-dimethoxy-6a,11a-dihydro-6H-benzofurano[3,2-c]chromen-3-ol	HQ14	Retinoic acid receptor RXR-alpha	RXRA
MOL000380	(6aR,11aR)-9,10-dimethoxy-6a,11a-dihydro-6H-benzofurano[3,2-c]chromen-3-ol	HQ14	Acetylcholinesterase	ACHE
MOL000380	(6aR,11aR)-9,10-dimethoxy-6a,11a-dihydro-6H-benzofurano[3,2-c]chromen-3-ol	HQ14	Alpha-1B adrenergic receptor	ADRA1B
MOL000380	(6aR,11aR)-9,10-dimethoxy-6a,11a-dihydro-6H-benzofurano[3,2-c]chromen-3-ol	HQ14	Beta-2 adrenergic receptor	ADRB2
MOL000380	(6aR,11aR)-9,10-dimethoxy-6a,11a-dihydro-6H-benzofurano[3,2-c]chromen-3-ol	HQ14	Alpha-1D adrenergic receptor	ADRA1D
MOL000380	(6aR,11aR)-9,10-dimethoxy-6a,11a-dihydro-6H-benzofurano[3,2-c]chromen-3-ol	HQ14	Gamma-aminobutyric acid receptor subunit alpha-1	GABRA1
MOL000380	(6aR,11aR)-9,10-dimethoxy-6a,11a-dihydro-6H-benzofurano[3,2-c]chromen-3-ol	HQ14	Heat shock protein HSP 90	HSP83
MOL000380	(6aR,11aR)-9,10-dimethoxy-6a,11a-dihydro-6H-benzofurano[3,2-c]chromen-3-ol	HQ14	Neuronal acetylcholine receptor protein, alpha-7 chain	CHRNA7
MOL000380	(6aR,11aR)-9,10-dimethoxy-6a,11a-dihydro-6H-benzofurano[3,2-c]chromen-3-ol	HQ14	Trypsin-1	PRSS1
MOL000380	(6aR,11aR)-9,10-dimethoxy-6a,11a-dihydro-6H-benzofurano[3,2-c]chromen-3-ol	HQ14	Nuclear receptor coactivator 2	NCOA2
MOL000380	(6aR,11aR)-9,10-dimethoxy-6a,11a-dihydro-6H-benzofurano[3,2-c]chromen-3-ol	HQ14	Nuclear receptor coactivator 1	NCOA1
MOL000380	(6aR,11aR)-9,10-dimethoxy-6a,11a-dihydro-6H-benzofurano[3,2-c]chromen-3-ol	HQ14	Calmodulin	CALM
MOL000380	(6aR,11aR)-9,10-dimethoxy-6a,11a-dihydro-6H-benzofurano[3,2-c]chromen-3-ol	HQ14	Muscarinic acetylcholine receptor M4	CHRM4
MOL000381	13-hydroxy-9,11-octadecadienoic acid	HQ15	Prostaglandin G/H synthase 1	PTGS1
MOL000381	13-hydroxy-9,11-octadecadienoic acid	HQ15	Prostaglandin G/H synthase 2	PTGS2
MOL000381	13-hydroxy-9,11-octadecadienoic acid	HQ15	Nuclear receptor coactivator 2	NCOA2
MOL000387	Bifendate	HQ16	Prostaglandin G/H synthase 2	PTGS2
MOL000387	Bifendate	HQ16	Vascular endothelial growth factor receptor 2	KDR
MOL000387	Bifendate	HQ16	Hepatocyte growth factor receptor	MET
MOL000387	Bifendate	HQ16	Heat shock protein HSP 90	HSP83
MOL000387	Bifendate	HQ16	Calcium-activated potassium channel subunit alpha 1	KCNMA1
MOL000387	Bifendate	HQ16	Prostaglandin G/H synthase 1	PTGS1
MOL000387	Bifendate	HQ16	DNA topoisomerase II	TOP2
MOL000392	formononetin	HQ17	Nitric oxide synthase, inducible	NOS2
MOL000392	formononetin	HQ17	Prostaglandin G/H synthase 1	PTGS1
MOL000392	formononetin	HQ17	Muscarinic acetylcholine receptor M1	CHRM1
MOL000392	formononetin	HQ17	Estrogen receptor	ESR1
MOL000392	formononetin	HQ17	Androgen receptor	AR
MOL000392	formononetin	HQ17	Peroxisome proliferator activated receptor gamma	PPARG
MOL000392	formononetin	HQ17	Prostaglandin G/H synthase 2	PTGS2
MOL000392	formononetin	HQ17	Retinoic acid receptor RXR-alpha	RXRA
MOL000392	formononetin	HQ17	CGMP-inhibited 3',5'-cyclic phosphodiesterase A	PDE3A
MOL000392	formononetin	HQ17	Alpha-1A adrenergic receptor	ADRA1A
MOL000392	formononetin	HQ17	Sodium-dependent dopamine transporter	SLC6A3
MOL000392	formononetin	HQ17	Beta-2 adrenergic receptor	ADRB2
MOL000392	formononetin	HQ17	Sodium-dependent serotonin transporter	SLC6A4
MOL000392	formononetin	HQ17	Estrogen receptor beta	ESR2
MOL000392	formononetin	HQ17	Dipeptidyl peptidase IV	DPP4
MOL000392	formononetin	HQ17	Mitogen-activated protein kinase 14	MAPK14
MOL000392	formononetin	HQ17	Glycogen synthase kinase-3 beta	GSK3B
MOL000392	formononetin	HQ17	Heat shock protein HSP 90	HSP83
MOL000392	formononetin	HQ17	Cell division protein kinase 2	CDK2
MOL000392	formononetin	HQ17	Amine oxidase [flavin-containing] B	MAOB
MOL000392	formononetin	HQ17	Serine/threonine-protein kinase Chk1	CHEK1
MOL000392	formononetin	HQ17	mRNA of PKA Catalytic Subunit C-alpha	PRKACA
MOL000392	formononetin	HQ17	Trypsin-1	PRSS1
MOL000392	formononetin	HQ17	Proto-oncogene serine/threonine-protein kinase Pim-1	PIM1
MOL000392	formononetin	HQ17	Cyclin-A2	CCNA2
MOL000392	formononetin	HQ17	Calmodulin	CALM
MOL000392	formononetin	HQ17	cAMP-dependent protein kinase inhibitor alpha	PKIA
MOL000392	formononetin	HQ17	Nitric-oxide synthase, endothelial	NOS3
MOL000392	formononetin	HQ17	Acetylcholinesterase	ACHE
MOL000392	formononetin	HQ17	Beta-lactamase	AMPC
MOL000392	formononetin	HQ17	Peroxisome proliferator-activated receptor gamma	PPARG
MOL000392	formononetin	HQ17	Interleukin-4	IL4
MOL000392	formononetin	HQ17	NAD-dependent deacetylase sirtuin-1	SIRT1
MOL000392	formononetin	HQ17	ATP synthase subunit beta, mitochondrial	ATP5F1B
MOL000392	formononetin	HQ17	NADH-ubiquinone oxidoreductase chain 6	MT-ND6
MOL000392	formononetin	HQ17	3 beta-hydroxysteroid dehydrogenase/Delta 5-->4-isomerase type 2	HSD3B2
MOL000392	formononetin	HQ17	3 beta-hydroxysteroid dehydrogenase/Delta 5-->4-isomerase type 1	HSD3B1
MOL000442	1,7-Dihydroxy-3,9-dimethoxy pterocarpene	HQ18	Prostaglandin G/H synthase 2	PTGS2
MOL000442	1,7-Dihydroxy-3,9-dimethoxy pterocarpene	HQ18	Retinoic acid receptor RXR-alpha	RXRA
MOL000442	1,7-Dihydroxy-3,9-dimethoxy pterocarpene	HQ18	Heat shock protein HSP 90	HSP83
MOL000442	1,7-Dihydroxy-3,9-dimethoxy pterocarpene	HQ18	Trypsin-1	PRSS1
MOL000098	quercetin	HQ19	Prostaglandin G/H synthase 1	PTGS1
MOL000098	quercetin	HQ19	Androgen receptor	AR
MOL000098	quercetin	HQ19	Peroxisome proliferator activated receptor gamma	PPARG
MOL000098	quercetin	HQ19	Prostaglandin G/H synthase 2	PTGS2
MOL000098	quercetin	HQ19	Heat shock protein HSP 90	HSP83
MOL000098	quercetin	HQ19	Phosphatidylinositol-4,5-bisphosphate 3-kinase catalytic subunit, gamma isoform	PIK3CG
MOL000098	quercetin	HQ19	Nuclear receptor coactivator 2	NCOA2
MOL000098	quercetin	HQ19	Dipeptidyl peptidase IV	DPP4
MOL000098	quercetin	HQ19	Trypsin-1	PRSS1
MOL000098	quercetin	HQ19	DNA topoisomerase II	TOP2
MOL000098	quercetin	HQ19	Potassium voltage-gated channel subfamily H member 2	KCNH2
MOL000098	quercetin	HQ19	Sodium channel protein type 5 subunit alpha	SCN5A
MOL000098	quercetin	HQ19	Coagulation factor Xa	F10
MOL000098	quercetin	HQ19	Prostaglandin G/H synthase 1	PTGS1
MOL000098	quercetin	HQ19	Androgen receptor	AR
MOL000098	quercetin	HQ19	Peroxisome proliferator activated receptor gamma	PPARG
MOL000098	quercetin	HQ19	Prostaglandin G/H synthase 2	PTGS2
MOL000098	quercetin	HQ19	Heat shock protein HSP 90	HSP83
MOL000098	quercetin	HQ19	Phosphatidylinositol-4,5-bisphosphate 3-kinase catalytic subunit, gamma isoform	PIK3CG
MOL000098	quercetin	HQ19	Nuclear receptor coactivator 2	NCOA2
MOL000098	quercetin	HQ19	Dipeptidyl peptidase IV	DPP4
MOL000098	quercetin	HQ19	Trypsin-1	PRSS1
MOL000098	quercetin	HQ19	DNA topoisomerase II	TOP2
MOL000098	quercetin	HQ19	Potassium voltage-gated channel subfamily H member 2	KCNH2
MOL000098	quercetin	HQ19	Sodium channel protein type 5 subunit alpha	SCN5A
MOL000098	quercetin	HQ19	Coagulation factor Xa	F10
MOL000098	quercetin	HQ19	Bcl-2-like protein 1	BCL2L1
MOL000098	quercetin	HQ19	Proto-oncogene c-Fos	FOS
MOL000098	quercetin	HQ19	Cyclin-dependent kinase inhibitor 1	CDKN1A
MOL000098	quercetin	HQ19	Eukaryotic translation initiation factor 6	EIF6
MOL000098	quercetin	HQ19	Apoptosis regulator BAX	BAX
MOL000098	quercetin	HQ19	Caspase-9	CASP9
MOL000098	quercetin	HQ19	Urokinase-type plasminogen activator	PLAU
MOL000098	quercetin	HQ19	72 kDa type IV collagenase	MMP2
MOL000098	quercetin	HQ19	Matrix metalloproteinase-9	MMP9
MOL000098	quercetin	HQ19	Mitogen-activated protein kinase 1	MAPK1
MOL000098	quercetin	HQ19	Interleukin-10	IL10
MOL000098	quercetin	HQ19	Pro-epidermal growth factor	EGF
MOL000098	quercetin	HQ19	Retinoblastoma-associated protein	RB1
MOL000098	quercetin	HQ19	Tumor necrosis factor	TNF
MOL000098	quercetin	HQ19	Interleukin-6	IL6
MOL000098	quercetin	HQ19	Cyclin-dependent kinase inhibitor 2A, isoforms 1/2/3	CDKN2A
MOL000098	quercetin	HQ19	Activator of 90 kDa heat shock protein ATPase homolog 1	AHSA1
MOL000098	quercetin	HQ19	Caspase-3	CASP3
MOL000098	quercetin	HQ19	Cellular tumor antigen p53	TP53
MOL000098	quercetin	HQ19	ETS domain-containing protein Elk-1	ELK1
MOL000098	quercetin	HQ19	NF-kappa-B inhibitor alpha	NFKBIA
MOL000098	quercetin	HQ19	NADPH--cytochrome P450 reductase	POR
MOL000098	quercetin	HQ19	Ornithine decarboxylase	ODC1
MOL000098	quercetin	HQ19	Xanthine dehydrogenase/oxidase	XDH
MOL000098	quercetin	HQ19	Caspase-8	CASP8
MOL000098	quercetin	HQ19	DNA topoisomerase 1	TOP1
MOL000098	quercetin	HQ19	RAF proto-oncogene serine/threonine-protein kinase	RAF1
MOL000098	quercetin	HQ19	Superoxide dismutase [Cu-Zn]	SOD1
MOL000098	quercetin	HQ19	Protein kinase C alpha type	PRKCA
MOL000098	quercetin	HQ19	Interstitial collagenase	MMP1
MOL000098	quercetin	HQ19	Hypoxia-inducible factor 1-alpha	HIF1A
MOL000098	quercetin	HQ19	Signal transducer and activator of transcription 1-alpha/beta	STAT1
MOL000098	quercetin	HQ19	Protein CBFA2T1	RUNX1T1
MOL000098	quercetin	HQ19	Cell division control protein 2 homolog	CDC2
MOL000098	quercetin	HQ19	78 kDa glucose-regulated protein	HSPA5
MOL000098	quercetin	HQ19	Receptor tyrosine-protein kinase erbB-2	ERBB2
MOL000098	quercetin	HQ19	Peroxisome proliferator-activated receptor gamma	PPARG
MOL000098	quercetin	HQ19	Acetyl-CoA carboxylase 1	ACACA
MOL000098	quercetin	HQ19	Heme oxygenase 1	HMOX1
MOL000098	quercetin	HQ19	Cytochrome P450 3A4	CYP3A4
MOL000098	quercetin	HQ19	Cytochrome P450 1A2	CYP1A2
MOL000098	quercetin	HQ19	Caveolin-1	CAV1
MOL000098	quercetin	HQ19	Myc proto-oncogene protein	MYC
MOL000098	quercetin	HQ19	Tissue factor	F3
MOL000098	quercetin	HQ19	Gap junction alpha-1 protein	GJA1
MOL000098	quercetin	HQ19	Cytochrome P450 1A1	CYP1A1
MOL000098	quercetin	HQ19	Intercellular adhesion molecule 1	ICAM1
MOL000098	quercetin	HQ19	Interleukin-1 beta	IL1B
MOL000098	quercetin	HQ19	C-C motif chemokine 2	CCL2
MOL000098	quercetin	HQ19	E-selectin	SELE
MOL000098	quercetin	HQ19	Vascular cell adhesion protein 1	VCAM1
MOL000098	quercetin	HQ19	Prostaglandin E2 receptor EP3 subtype	PTGER3
MOL000098	quercetin	HQ19	Interleukin-8	CXCL8
MOL000098	quercetin	HQ19	Protein kinase C beta type	PRKCB
MOL000098	quercetin	HQ19	Baculoviral IAP repeat-containing protein 5	BIRC5
MOL000098	quercetin	HQ19	Dual oxidase 2	DUOX2
MOL000098	quercetin	HQ19	Nitric oxide synthase, endothelial	NOS3
MOL000098	quercetin	HQ19	Heat shock protein beta-1	HSPB1
MOL000098	quercetin	HQ19	Transforming growth factor beta-1	TGFB1
MOL000098	quercetin	HQ19	Estrogen sulfotransferase	SULT1E1
MOL000098	quercetin	HQ19	Maltase-glucoamylase, intestinal	MGAM
MOL000098	quercetin	HQ19	Interleukin-2	IL2
MOL000098	quercetin	HQ19	Nuclear receptor subfamily 1 group I member 2	NR1I2
MOL000098	quercetin	HQ19	Cytochrome P450 1B1	CYP1B1
MOL000098	quercetin	HQ19	G2/mitotic-specific cyclin-B1	CCNB1
MOL000098	quercetin	HQ19	Tissue-type plasminogen activator	PLAT
MOL000098	quercetin	HQ19	Thrombomodulin	THBD
MOL000098	quercetin	HQ19	Plasminogen activator inhibitor 1	SERPINE1
MOL000098	quercetin	HQ19	Collagen alpha-1(I) chain	COL1A1
MOL000098	quercetin	HQ19	Interferon gamma	IFNG
MOL000098	quercetin	HQ19	Arachidonate 5-lipoxygenase	ALOX5
MOL000098	quercetin	HQ19	Phosphatidylinositol-3,4,5-trisphosphate 3-phosphatase and dual-specificity protein phosphatase PTEN	PTEN
MOL000098	quercetin	HQ19	Interleukin-1 alpha	IL1A
MOL000098	quercetin	HQ19	Myeloperoxidase	MPO
MOL000098	quercetin	HQ19	DNA topoisomerase 2-alpha	TOP2A
MOL000098	quercetin	HQ19	Neutrophil cytosol factor 1	NCF1
MOL000098	quercetin	HQ19	Hyaluronan synthase 2	HAS2
MOL000098	quercetin	HQ19	Glutathione S-transferase P	GSTP1
MOL000098	quercetin	HQ19	Nuclear factor erythroid 2-related factor 2	NFE2L2
MOL000098	quercetin	HQ19	NAD(P)H dehydrogenase [quinone] 1	NQO1
MOL000098	quercetin	HQ19	Poly [ADP-ribose] polymerase 1	PARP1
MOL000098	quercetin	HQ19	Aryl hydrocarbon receptor	AHR
MOL000098	quercetin	HQ19	26S proteasome non-ATPase regulatory subunit 3	PSMD3
MOL000098	quercetin	HQ19	Solute carrier family 2, facilitated glucose transporter member 4	SLC2A4
MOL000098	quercetin	HQ19	Collagen alpha-1(III) chain	COL3A1
MOL000098	quercetin	HQ19	DNA gyrase subunit B	gyrB
MOL000098	quercetin	HQ19	C-X-C motif chemokine 11	CXCL11
MOL000098	quercetin	HQ19	C-X-C motif chemokine 2	CXCL2
MOL000098	quercetin	HQ19	DDB1- and CUL4-associated factor 5	DCAF5
MOL000098	quercetin	HQ19	Nuclear receptor subfamily 1 group I member 3	NR1I3
MOL000098	quercetin	HQ19	Serine/threonine-protein kinase Chk2	CHEK2
MOL000098	quercetin	HQ19	Insulin receptor	INSR
MOL000098	quercetin	HQ19	Claudin-4	CLDN4
MOL000098	quercetin	HQ19	Peroxisome proliferator-activated receptor alpha	PPARA
MOL000098	quercetin	HQ19	Peroxisome proliferator-activated receptor delta	PPARD
MOL000098	quercetin	HQ19	Heat shock factor protein 1	HSF1
MOL000098	quercetin	HQ19	C-reactive protein	CRP
MOL000098	quercetin	HQ19	C-X-C motif chemokine 10	CXCL10
MOL000098	quercetin	HQ19	Inhibitor of nuclear factor kappa-B kinase subunit alpha	CHUK
MOL000098	quercetin	HQ19	Osteopontin	SPP1
MOL000098	quercetin	HQ19	Runt-related transcription factor 2	RUNX2
MOL000098	quercetin	HQ19	Ras association domain-containing protein 1	RASSF1
MOL000098	quercetin	HQ19	Transcription factor E2F1	E2F1
MOL000098	quercetin	HQ19	Transcription factor E2F2	E2F2
MOL000098	quercetin	HQ19	Prostatic acid phosphatase	ACP3
MOL000098	quercetin	HQ19	Cathepsin D	CTSD
MOL000098	quercetin	HQ19	Insulin-like growth factor-binding protein 3	IGFBP3
MOL000098	quercetin	HQ19	Insulin-like growth factor II	IGF2
MOL000098	quercetin	HQ19	CD40 ligand	CD40LG
MOL000098	quercetin	HQ19	Interferon regulatory factor 1	IRF1
MOL000098	quercetin	HQ19	Receptor tyrosine-protein kinase erbB-3	ERBB3
MOL000098	quercetin	HQ19	Serum paraoxonase/arylesterase 1	PON1
MOL000098	quercetin	HQ19	Type I iodothyronine deiodinase	DIO1
MOL000098	quercetin	HQ19	Procollagen C-endopeptidase enhancer 1	PCOLCE
MOL000098	quercetin	HQ19	Puromycin-sensitive aminopeptidase	NPEPPS
MOL000098	quercetin	HQ19	Hexokinase-2	HK2
MOL000098	quercetin	HQ19	Homeobox protein Nkx-3.1	NKX3-1
MOL000098	quercetin	HQ19	Transcription factor E2F1	E2F1
MOL000098	quercetin	HQ19	Transcription factor E2F2	E2F2
MOL000098	quercetin	HQ19	Prostatic acid phosphatase	ACP3
MOL000098	quercetin	HQ19	Cathepsin D	CTSD
MOL000098	quercetin	HQ19	Insulin-like growth factor-binding protein 3	IGFBP3
MOL000098	quercetin	HQ19	Insulin-like growth factor II	IGF2
MOL000098	quercetin	HQ19	CD40 ligand	CD40LG
MOL000098	quercetin	HQ19	Interferon regulatory factor 1	IRF1
MOL000098	quercetin	HQ19	Receptor tyrosine-protein kinase erbB-3	ERBB3
MOL000098	quercetin	HQ19	Serum paraoxonase/arylesterase 1	PON1
MOL000098	quercetin	HQ19	Type I iodothyronine deiodinase	DIO1
MOL000098	quercetin	HQ19	Procollagen C-endopeptidase enhancer 1	PCOLCE
MOL000098	quercetin	HQ19	Puromycin-sensitive aminopeptidase	NPEPPS
MOL000098	quercetin	HQ19	Hexokinase-2	HK2
MOL000098	quercetin	HQ19	Homeobox protein Nkx-3.1	NKX3-1

## Sheet: CX
MOLID	ingredients	Abbreviated ID	Target gene	Target gene
MOL000131	EIC	CX1	Prostaglandin G/H synthase 1	PTGS1
MOL000131	EIC	CX1	Prostaglandin G/H synthase 2	PTGS2
MOL000131	EIC	CX1	Retinoic acid receptor RXR-alpha	RXRA
MOL000131	EIC	CX1	Nuclear receptor coactivator 2	NCOA2
MOL000131	EIC	CX1	Nicotinate-nucleotide--dimethylbenzimidazole phosphoribosyltransferase	cobT
MOL000131	EIC	CX1	Sodium-dependent noradrenaline transporter	SLC6A2
MOL000131	EIC	CX1	Ig gamma-1 chain C region	IGHG1
MOL000131	EIC	CX1	Gamma-aminobutyric-acid receptor alpha-2 subunit	GABRA2
MOL000131	EIC	CX1	Gamma-aminobutyric acid receptor subunit alpha-1	GABRA1
MOL000131	EIC	CX1	Transient receptor potential cation channel subfamily V member 1	TRPV1
MOL000131	EIC	CX1	Muscarinic acetylcholine receptor M1	CHRM1
MOL000131	EIC	CX1	Muscarinic acetylcholine receptor M2	CHRM2
MOL000131	EIC	CX1	Gamma-aminobutyric-acid receptor subunit alpha-6	GABRA6
MOL001390	49070_FLUKA	CX2	Muscarinic acetylcholine receptor M3	CHRM3
MOL001390	49070_FLUKA	CX2	Muscarinic acetylcholine receptor M1	CHRM1
MOL001390	49070_FLUKA	CX2	Muscarinic acetylcholine receptor M2	CHRM2
MOL001390	49070_FLUKA	CX2	Gamma-aminobutyric acid receptor subunit alpha-1	GABRA1
MOL001390	49070_FLUKA	CX2	Prostaglandin G/H synthase 2	PTGS2
MOL001390	49070_FLUKA	CX2	Alcohol dehydrogenase 1C	ADH1C
MOL001494	Mandenol	CX3	Prostaglandin G/H synthase 1	PTGS1
MOL001494	Mandenol	CX3	Prostaglandin G/H synthase 1	PTGS1
MOL001494	Mandenol	CX3	Prostaglandin G/H synthase 1	PTGS1
MOL001641	METHYL LINOLEATE	CX4	Prostaglandin G/H synthase 1	PTGS1
MOL001641	METHYL LINOLEATE	CX4	Prostaglandin G/H synthase 2	PTGS2
MOL001641	METHYL LINOLEATE	CX4	Nuclear receptor coactivator 2	NCOA2
MOL001641	METHYL LINOLEATE	CX4	Retinoic acid receptor RXR-alpha	RXRA
MOL000208	()-Aromadendrene	CX5	Muscarinic acetylcholine receptor M3	CHRM3
MOL000208	()-Aromadendrene	CX5	Muscarinic acetylcholine receptor M2	CHRM2
MOL000208	()-Aromadendrene	CX5	Muscarinic acetylcholine receptor M1	CHRM1
MOL000208	()-Aromadendrene	CX5	Alcohol dehydrogenase 1C	ADH1C
MOL000208	()-Aromadendrene	CX5	Nicotinate-nucleotide--dimethylbenzimidazole phosphoribosyltransferase	cobT
MOL002096	(+)-ALPHA-FUNEBRENE	CX6	Muscarinic acetylcholine receptor M3	CHRM3
MOL002096	(+)-ALPHA-FUNEBRENE	CX6	Muscarinic acetylcholine receptor M1	CHRM1
MOL002096	(+)-ALPHA-FUNEBRENE	CX6	Gamma-aminobutyric-acid receptor alpha-2 subunit	GABRA2
MOL002096	(+)-ALPHA-FUNEBRENE	CX6	Retinoic acid receptor RXR-alpha	RXRA
MOL002096	(+)-ALPHA-FUNEBRENE	CX6	Muscarinic acetylcholine receptor M2	CHRM2
MOL002096	(+)-ALPHA-FUNEBRENE	CX6	Alpha-1B adrenergic receptor	ADRA1B
MOL002096	(+)-ALPHA-FUNEBRENE	CX6	Neuronal acetylcholine receptor subunit alpha-2	CHRNA2
MOL002096	(+)-ALPHA-FUNEBRENE	CX6	Gamma-aminobutyric acid receptor subunit alpha-1	GABRA1
MOL002096	(+)-ALPHA-FUNEBRENE	CX6	Nuclear receptor coactivator 2	NCOA2
MOL002096	(+)-ALPHA-FUNEBRENE	CX6	Gamma-aminobutyric-acid receptor subunit alpha-6	GABRA6
MOL002096	(+)-ALPHA-FUNEBRENE	CX6	Prostaglandin G/H synthase 2	PTGS2
MOL002096	(+)-ALPHA-FUNEBRENE	CX6	Gamma-aminobutyric-acid receptor alpha-3 subunit	GABRB3
MOL002120	betea-CUBEBENE	CX7	Muscarinic acetylcholine receptor M3	CHRM3
MOL002120	betea-CUBEBENE	CX7	Muscarinic acetylcholine receptor M1	CHRM1
MOL002120	betea-CUBEBENE	CX7	Prostaglandin G/H synthase 2	PTGS2
MOL002120	betea-CUBEBENE	CX7	Muscarinic acetylcholine receptor M2	CHRM2
MOL002120	betea-CUBEBENE	CX7	Gamma-aminobutyric acid receptor subunit alpha-1	GABRA1
MOL002135	Myricanone	CX8	Nitric oxide synthase, inducible	NOS2
MOL002135	Myricanone	CX8	Prostaglandin G/H synthase 1	PTGS1
MOL002135	Myricanone	CX8	Potassium voltage-gated channel subfamily H member 2	KCNH2
MOL002135	Myricanone	CX8	Estrogen receptor	ESR1
MOL002135	Myricanone	CX8	Androgen receptor	AR
MOL002135	Myricanone	CX8	Sodium channel protein type 5 subunit alpha	SCN5A
MOL002135	Myricanone	CX8	Peroxisome proliferator activated receptor gamma	PPARG
MOL002135	Myricanone	CX8	Prostaglandin G/H synthase 2	PTGS2
MOL002135	Myricanone	CX8	Coagulation factor VII	F7
MOL002135	Myricanone	CX8	Vascular endothelial growth factor receptor 2	KDR
MOL002135	Myricanone	CX8	Retinoic acid receptor RXR-alpha	RXRA
MOL002135	Myricanone	CX8	CGMP-inhibited 3',5'-cyclic phosphodiesterase A	PDE3A
MOL002135	Myricanone	CX8	Beta-2 adrenergic receptor	ADRB2
MOL002135	Myricanone	CX8	Estrogen receptor beta	ESR2
MOL002135	Myricanone	CX8	Dipeptidyl peptidase IV	DPP4
MOL002135	Myricanone	CX8	Mitogen-activated protein kinase 14	MAPK14
MOL002135	Myricanone	CX8	Glycogen synthase kinase-3 beta	GSK3B
MOL002135	Myricanone	CX8	Cell division protein kinase 2	CDK2
MOL002135	Myricanone	CX8	Serine/threonine-protein kinase Chk1	CHEK1
MOL002135	Myricanone	CX8	Ig gamma-1 chain C region	IGHG1
MOL002135	Myricanone	CX8	Proto-oncogene serine/threonine-protein kinase Pim-1	PIM1
MOL002135	Myricanone	CX8	Cyclin-A2	CCNA2
MOL002135	Myricanone	CX8	Nuclear receptor coactivator 1	NCOA1
MOL002140	Perlolyrine	CX9	Prostaglandin G/H synthase 2	PTGS2
MOL002140	Perlolyrine	CX9	Retinoic acid receptor RXR-alpha	RXRA
MOL002150	1-Acetyl-beta-carboline	CX10	Prostaglandin G/H synthase 1	PTGS1
MOL002150	1-Acetyl-beta-carboline	CX10	Sodium channel protein type 5 subunit alpha	SCN5A
MOL002150	1-Acetyl-beta-carboline	CX10	Prostaglandin G/H synthase 2	PTGS2
MOL002150	1-Acetyl-beta-carboline	CX10	Gamma-aminobutyric acid receptor subunit alpha-1	GABRA1
MOL002150	1-Acetyl-beta-carboline	CX10	Leukotriene A-4 hydrolase	LTA4H
MOL002150	1-Acetyl-beta-carboline	CX10	Amine oxidase [flavin-containing] B	MAOB
MOL002150	1-Acetyl-beta-carboline	CX10	cAMP-dependent protein kinase inhibitor alpha	PKIA
MOL002153	1H-Cycloprop(e)azulen-7-ol, decahydro-1,1,7-trimethyl-4-methylene-, (1aR-(1aalpha,4aalpha,7beta,7abeta,7balpha))-	CX11	Muscarinic acetylcholine receptor M3	CHRM3
MOL002153	1H-Cycloprop(e)azulen-7-ol, decahydro-1,1,7-trimethyl-4-methylene-, (1aR-(1aalpha,4aalpha,7beta,7abeta,7balpha))-	CX11	Muscarinic acetylcholine receptor M1	CHRM1
MOL002153	1H-Cycloprop(e)azulen-7-ol, decahydro-1,1,7-trimethyl-4-methylene-, (1aR-(1aalpha,4aalpha,7beta,7abeta,7balpha))-	CX11	Muscarinic acetylcholine receptor M2	CHRM2
MOL002153	1H-Cycloprop(e)azulen-7-ol, decahydro-1,1,7-trimethyl-4-methylene-, (1aR-(1aalpha,4aalpha,7beta,7abeta,7balpha))-	CX11	Gamma-aminobutyric acid receptor subunit alpha-1	GABRA1
MOL002153	1H-Cycloprop(e)azulen-7-ol, decahydro-1,1,7-trimethyl-4-methylene-, (1aR-(1aalpha,4aalpha,7beta,7abeta,7balpha))-	CX11	Gamma-aminobutyric-acid receptor subunit alpha-6	GABRA6
MOL002157	wallichilide	CX12	Prostaglandin G/H synthase 2	PTGS2
MOL002157	wallichilide	CX12	Mineralocorticoid receptor	NR3C2
MOL002157	wallichilide	CX12	Glucocorticoid receptor	NR3C1
MOL002157	wallichilide	CX12	Nuclear receptor coactivator 2	NCOA2
MOL002161	1-beta-ethylacrylate-7-aldehyde-beta-carboline	CX13	Prostaglandin G/H synthase 1	PTGS1
MOL002161	1-beta-ethylacrylate-7-aldehyde-beta-carboline	CX13	Prostaglandin G/H synthase 2	PTGS2
MOL002186	Aromadendrene oxide 2	CX14	Muscarinic acetylcholine receptor M3	CHRM3
MOL002186	Aromadendrene oxide 2	CX14	Muscarinic acetylcholine receptor M1	CHRM1
MOL002186	Aromadendrene oxide 2	CX14	Muscarinic acetylcholine receptor M2	CHRM2
MOL002186	Aromadendrene oxide 2	CX14	Gamma-aminobutyric acid receptor subunit alpha-1	GABRA1
MOL002190	Cedrene	CX15	Muscarinic acetylcholine receptor M3	CHRM3
MOL002190	Cedrene	CX15	Muscarinic acetylcholine receptor M1	CHRM1
MOL002190	Cedrene	CX15	Prostaglandin G/H synthase 2	PTGS2
MOL002190	Cedrene	CX15	Gamma-aminobutyric-acid receptor alpha-2 subunit	GABRA2
MOL002190	Cedrene	CX15	Retinoic acid receptor RXR-alpha	RXRA
MOL002190	Cedrene	CX15	Muscarinic acetylcholine receptor M2	CHRM2
MOL002190	Cedrene	CX15	Alpha-1B adrenergic receptor	ADRA1B
MOL002190	Cedrene	CX15	Neuronal acetylcholine receptor subunit alpha-2	CHRNA2
MOL002190	Cedrene	CX15	Gamma-aminobutyric acid receptor subunit alpha-1	GABRA1
MOL002190	Cedrene	CX15	Gamma-aminobutyric-acid receptor alpha-3 subunit	GABRB3
MOL002190	Cedrene	CX15	Gamma-aminobutyric-acid receptor subunit alpha-6	GABRA6
MOL002203	Exceparl M-OL	CX16	Prostaglandin G/H synthase 1	PTGS1
MOL002203	Exceparl M-OL	CX16	Prostaglandin G/H synthase 2	PTGS2
MOL002203	Exceparl M-OL	CX16	Retinoic acid receptor RXR-alpha	RXRA
MOL002203	Exceparl M-OL	CX16	Nuclear receptor coactivator 2	NCOA2
MOL000357	Sitogluside	CX17	Progesterone receptor	PGR
MOL000357	Sitogluside	CX17	Prostaglandin G/H synthase 1	PTGS1
MOL000357	Sitogluside	CX17	Muscarinic acetylcholine receptor M3	CHRM3
MOL000357	Sitogluside	CX17	Potassium voltage-gated channel subfamily H member 2	KCNH2
MOL000357	Sitogluside	CX17	Muscarinic acetylcholine receptor M1	CHRM1
MOL000357	Sitogluside	CX17	Sodium channel protein type 5 subunit alpha	SCN5A
MOL000357	Sitogluside	CX17	Prostaglandin G/H synthase 2	PTGS2
MOL000357	Sitogluside	CX17	5-hydroxytryptamine receptor 3A	HTR3A
MOL000357	Sitogluside	CX17	Retinoic acid receptor RXR-alpha	RXRA
MOL000357	Sitogluside	CX17	CGMP-inhibited 3',5'-cyclic phosphodiesterase A	PDE3A
MOL000357	Sitogluside	CX17	Alpha-1B adrenergic receptor	ADRA1B
MOL000357	Sitogluside	CX17	Beta-2 adrenergic receptor	ADRB2
MOL000357	Sitogluside	CX17	Alpha-1D adrenergic receptor	ADRA1D
MOL000357	Sitogluside	CX17	Nuclear receptor coactivator 2	NCOA2
MOL000359	sitosterol	CX17	Progesterone receptor	PGR
MOL000359	sitosterol	CX17	Nuclear receptor coactivator 2	NCOA2
MOL000359	sitosterol	CX17	Mineralocorticoid receptor	NR3C2
MOL000433	FA	CX18	Cell division protein kinase 2	CDK2
MOL000433	FA	CX18	Glycogen synthase kinase-3 beta	GSK3B
MOL000675	oleic acid	CX19	Prostaglandin G/H synthase 1	PTGS1
MOL000675	oleic acid	CX19	Nuclear receptor coactivator 2	NCOA2
MOL000675	oleic acid	CX19	Prostaglandin G/H synthase 2	PTGS2
MOL000675	oleic acid	CX19	Alcohol dehydrogenase 1B	ADH1B
MOL000675	oleic acid	CX19	Alcohol dehydrogenase 1C	ADH1C
MOL000675	oleic acid	CX19	Alcohol dehydrogenase 1A	ADH1A
MOL000675	oleic acid	CX19	Nicotinate-nucleotide--dimethylbenzimidazole phosphoribosyltransferase	cobT
MOL000675	oleic acid	CX19	Trypsin-3	PRSS3
MOL000675	oleic acid	CX19	Retinoic acid receptor RXR-alpha	RXRA
MOL000675	oleic acid	CX19	Urokinase-type plasminogen activator	PLAU
MOL000675	oleic acid	CX19	Superoxide dismutase [Cu-Zn]	SOD1
MOL000675	oleic acid	CX19	Catalase	CAT
MOL000675	oleic acid	CX19	Telomerase protein component 1	TEP1
MOL000675	oleic acid	CX19	Endothelin-1	EDN1
MOL000675	oleic acid	CX19	Receptor tyrosine-protein kinase erbB-2	ERBB2
MOL000675	oleic acid	CX19	Peroxisome proliferator-activated receptor gamma	PPARG
MOL000675	oleic acid	CX19	Lipoprotein lipase	LPL
MOL000675	oleic acid	CX19	Neuromodulin	GAP43
MOL000675	oleic acid	CX19	Plasminogen activator inhibitor 1	SERPINE1
MOL000675	oleic acid	CX19	Brain-derived neurotrophic factor	BDNF
MOL000675	oleic acid	CX19	3-hydroxy-3-methylglutaryl-coenzyme A reductase	HMGCR
MOL000675	oleic acid	CX19	Myeloperoxidase	MPO
MOL000675	oleic acid	CX19	Peroxisome proliferator-activated receptor alpha	PPARA
MOL000675	oleic acid	CX19	Peroxisome proliferator-activated receptor delta	PPARD
MOL000675	oleic acid	CX19	C-reactive protein	CRP
MOL000675	oleic acid	CX19	Serum paraoxonase/arylesterase 1	PON1
MOL000675	oleic acid	CX19	Insulin	INS
MOL000675	oleic acid	CX19	Plasminogen	PLG
MOL000675	oleic acid	CX19	Fatty acid-binding protein, liver	FABP1
MOL000675	oleic acid	CX19	Retinol-binding protein 2	RBP2
MOL000675	oleic acid	CX19	Glutamyl aminopeptidase	ENPEP
MOL000675	oleic acid	CX19	Mitochondrial uncoupling protein 2	UCP2
MOL000675	oleic acid	CX19	Sterol O-acyltransferase 1	SOAT1
MOL000675	oleic acid	CX19	Cholecystokinin	CCK
MOL000675	oleic acid	CX19	Cbp/p300-interacting transactivator 1	CITED1
MOL000675	oleic acid	CX19	BDNF/NT-3 growth factors receptor	NTRK2
MOL000675	oleic acid	CX19	Pancreas/duodenum homeobox protein 1	PDX1
MOL000675	oleic acid	CX19	Solute carrier family 2, facilitated glucose transporter member 2	SLC2A2
MOL000675	oleic acid	CX19	Peptidyl-glycine alpha-amidating monooxygenase	PAM
MOL000675	oleic acid	CX19	Mitochondrial uncoupling protein 3	UCP3
MOL000675	oleic acid	CX19	Cholesteryl ester transfer protein	CETP
MOL000675	oleic acid	CX19	Peptide YY	PYY
MOL000675	oleic acid	CX19	Aspartyl aminopeptidase	DNPEP

## Sheet: FL
MOLID	ingredients	Abbreviated ID	Target gene	Target gene
MOL000273	(2R)-2-[(3S,5R,10S,13R,14R,16R,17R)-3,16-dihydroxy-4,4,10,13,14-pentamethyl-2,3,5,6,12,15,16,17-octahydro-1H-cyclopenta[a]phenanthren-17-yl]-6-methylhept-5-enoic acid	FL1	Mineralocorticoid receptor	NR3C2
MOL000273	(2R)-2-[(3S,5R,10S,13R,14R,16R,17R)-3,16-dihydroxy-4,4,10,13,14-pentamethyl-2,3,5,6,12,15,16,17-octahydro-1H-cyclopenta[a]phenanthren-17-yl]-6-methylhept-5-enoic acid	FL1	Nuclear receptor coactivator 2	NCOA2
MOL000275	trametenolic acid	FL2	Mineralocorticoid receptor	NR3C2
MOL000279	Cerevisterol	FL3	Mineralocorticoid receptor	NR3C2
MOL000282	ergosta-7,22E-dien-3beta-ol	FL4	Progesterone receptor	PGR
MOL000283	Ergosterol peroxide	FL5	Progesterone receptor	PGR
MOL000284	L-uridine	FL6	Prostaglandin G/H synthase 2	PTGS2
MOL000284	L-uridine	FL6	Carbonic anhydrase II	CA2
MOL000284	L-uridine	FL6	Thymidine kinase	TK1
MOL000295	alexandrin	FL7	Prostaglandin G/H synthase 2	PTGS2
MOL000295	alexandrin	FL7	Progesterone receptor	PGR
MOL000295	alexandrin	FL7	Mineralocorticoid receptor	NR3C2
MOL000295	alexandrin	FL7	Nuclear receptor coactivator 2	NCOA2
MOL000295	alexandrin	FL7	Nuclear receptor coactivator 1	NCOA1
MOL000295	alexandrin	FL7	Alcohol dehydrogenase 1C	ADH1C
MOL000295	alexandrin	FL7	Trypsin-3	PRSS3
MOL000295	alexandrin	FL7	DNA topoisomerase II	TOP2A
MOL000295	alexandrin	FL7	Prostaglandin G/H synthase 1	PTGS1
MOL000295	alexandrin	FL7	Glycogen phosphorylase, muscle form	PYGM
MOL000295	alexandrin	FL7	Phosphatidylinositol-4,5-bisphosphate 3-kinase catalytic subunit, gamma isoform	PIK3CG
MOL000296	hederagenin	FL8	Progesterone receptor	PGR
MOL000296	hederagenin	FL8	Nuclear receptor coactivator 2	NCOA2
MOL000296	hederagenin	FL8	Muscarinic acetylcholine receptor M3	CHRM3
MOL000296	hederagenin	FL8	Muscarinic acetylcholine receptor M1	CHRM1
MOL000296	hederagenin	FL8	Gamma-aminobutyric-acid receptor alpha-2 subunit	GABRA2
MOL000296	hederagenin	FL8	Gamma-aminobutyric-acid receptor alpha-3 subunit	GABRA3
MOL000296	hederagenin	FL8	Muscarinic acetylcholine receptor M2	CHRM2
MOL000296	hederagenin	FL8	Alpha-1B adrenergic receptor	ADRA1B
MOL000296	hederagenin	FL8	Gamma-aminobutyric acid receptor subunit alpha-1	GABRA1
MOL000296	hederagenin	FL8	Glutamate receptor 2	GRIA2
MOL000296	hederagenin	FL8	Gamma-aminobutyric-acid receptor subunit alpha-6	GABRA6
MOL000296	hederagenin	FL8	Gamma-aminobutyric-acid receptor alpha-5 subunit	GABRA5
MOL000296	hederagenin	FL8	Ig gamma-1 chain C region	IGHG1
MOL000296	hederagenin	FL8	Alcohol dehydrogenase 1B	ADH1B
MOL000296	hederagenin	FL8	Alcohol dehydrogenase 1C	ADH1C
MOL000296	hederagenin	FL8	Prostaglandin G/H synthase 1	PTGS1
MOL000296	hederagenin	FL8	Sodium channel protein type 5 subunit alpha	SCN5A
MOL000296	hederagenin	FL8	Prostaglandin G/H synthase 2	PTGS2
MOL000296	hederagenin	FL8	Retinoic acid receptor RXR-alpha	RXRA
MOL000296	hederagenin	FL8	CGMP-inhibited 3',5'-cyclic phosphodiesterase A	PDE3A
MOL000296	hederagenin	FL8	Sodium-dependent noradrenaline transporter	SLC6A2

## Sheet: SJ
MOLID	ingredients	Abbreviated ID	Target gene	Target gene
MOL001566	calarene	SJ1	Muscarinic acetylcholine receptor M3	CHRM3
MOL002467	6-gingerol	SJ2	Muscarinic acetylcholine receptor M1	CHRM1
MOL002467	6-gingerol	SJ2	Estrogen receptor	ESR1
MOL002467	6-gingerol	SJ2	Beta-1 adrenergic receptor	ADRB1
MOL002467	6-gingerol	SJ2	Sodium channel protein type 5 subunit alpha	SCN5A
MOL002467	6-gingerol	SJ2	Acetylcholinesterase	ACHE
MOL002467	6-gingerol	SJ2	CGMP-inhibited 3',5'-cyclic phosphodiesterase A	PDE3A
MOL002467	6-gingerol	SJ2	Sodium-dependent noradrenaline transporter	SLC6A2
MOL002467	6-gingerol	SJ2	Alpha-1A adrenergic receptor	ADRA1A
MOL002467	6-gingerol	SJ2	Alpha-1B adrenergic receptor	ADRA1B
MOL002467	6-gingerol	SJ2	Sodium-dependent dopamine transporter	SLC6A3
MOL002467	6-gingerol	SJ2	Beta-2 adrenergic receptor	ADRB2
MOL002467	6-gingerol	SJ2	Sodium-dependent serotonin transporter	SLC6A4
MOL002467	6-gingerol	SJ2	Leukotriene A-4 hydrolase	LTA4H
MOL002467	6-gingerol	SJ2	Transcription factor p65	RELA
MOL002467	6-gingerol	SJ2	Apoptosis regulator Bcl-2	BCL2
MOL002467	6-gingerol	SJ2	Apoptosis regulator BAX	BAX
MOL002467	6-gingerol	SJ2	Caspase-9	CASP9
MOL002467	6-gingerol	SJ2	72 kDa type IV collagenase	MMP2
MOL002467	6-gingerol	SJ2	Matrix metalloproteinase-9	MMP9
MOL002467	6-gingerol	SJ2	Caspase-3	CASP3
MOL002467	6-gingerol	SJ2	Cellular tumor antigen p53	TP53
MOL002467	6-gingerol	SJ2	Prostaglandin G/H synthase 2	PTGS2
MOL002467	6-gingerol	SJ2	Peroxisome proliferator-activated receptor gamma	PPARG
MOL002467	6-gingerol	SJ2	Baculoviral IAP repeat-containing protein 5	BIRC5
MOL002495	6-shogaol	SJ2	Apoptosis regulator Bcl-2	BCL2
MOL002495	6-shogaol	SJ2	Bcl-2-like protein 1	BCL2L1
MOL002495	6-shogaol	SJ2	Apoptosis regulator BAX	BAX
MOL002495	6-shogaol	SJ2	Fatty acid synthase	FASN
MOL002495	6-shogaol	SJ2	Peroxisome proliferator-activated receptor gamma	PPARG
MOL002495	6-shogaol	SJ2	Tumor necrosis factor ligand superfamily member 6	FASLG
MOL002495	6-shogaol	SJ2	DNA damage-inducible transcript 3 protein	DDIT3
MOL000358	beta-sitosterol	SJ3	Progesterone receptor	PGR
MOL000358	beta-sitosterol	SJ3	Nuclear receptor coactivator 2	NCOA2
MOL000358	beta-sitosterol	SJ3	Prostaglandin G/H synthase 1	PTGS1
MOL000358	beta-sitosterol	SJ3	Prostaglandin G/H synthase 2	PTGS2
MOL000358	beta-sitosterol	SJ3	Heat shock protein HSP 90	HSP83
MOL000358	beta-sitosterol	SJ3	Phosphatidylinositol-4,5-bisphosphate 3-kinase catalytic subunit, gamma isoform	PIK3CG
MOL000358	beta-sitosterol	SJ3	Potassium voltage-gated channel subfamily H member 2	KCNH2
MOL000358	beta-sitosterol	SJ3	Dopamine D1 receptor	DRD1
MOL000358	beta-sitosterol	SJ3	Muscarinic acetylcholine receptor M3	CHRM3
MOL000358	beta-sitosterol	SJ3	Muscarinic acetylcholine receptor M1	CHRM1
MOL000358	beta-sitosterol	SJ3	Sodium channel protein type 5 subunit alpha	SCN5A
MOL000358	beta-sitosterol	SJ3	Gamma-aminobutyric-acid receptor alpha-2 subunit	GABRA2
MOL000358	beta-sitosterol	SJ3	Muscarinic acetylcholine receptor M4	CHRM4
MOL000358	beta-sitosterol	SJ3	CGMP-inhibited 3',5'-cyclic phosphodiesterase A	PDE3A
MOL000358	beta-sitosterol	SJ3	5-hydroxytryptamine 2A receptor	HTR2A
MOL000358	beta-sitosterol	SJ3	Gamma-aminobutyric-acid receptor alpha-5 subunit	GABRA5
MOL000358	beta-sitosterol	SJ3	Alpha-1A adrenergic receptor	ADRA1A
MOL000358	beta-sitosterol	SJ3	Gamma-aminobutyric-acid receptor alpha-3 subunit	GABRA3
MOL000358	beta-sitosterol	SJ3	Muscarinic acetylcholine receptor M2	CHRM2
MOL000358	beta-sitosterol	SJ3	Alpha-1B adrenergic receptor	ADRA1B
MOL000358	beta-sitosterol	SJ3	Beta-2 adrenergic receptor	ADRB2
MOL000358	beta-sitosterol	SJ3	Neuronal acetylcholine receptor subunit alpha-2	CHRNA2
MOL000358	beta-sitosterol	SJ3	Sodium-dependent serotonin transporter	SLC6A4
MOL000358	beta-sitosterol	SJ3	Mu-type opioid receptor	OPRM1
MOL000358	beta-sitosterol	SJ3	Gamma-aminobutyric acid receptor subunit alpha-1	GABRA1
MOL000358	beta-sitosterol	SJ3	Neuronal acetylcholine receptor protein, alpha-7 chain	CHRNA7
MOL000358	beta-sitosterol	SJ3	Apoptosis regulator Bcl-2	BCL2
MOL000358	beta-sitosterol	SJ3	Apoptosis regulator BAX	BAX
MOL000358	beta-sitosterol	SJ3	5-hydroxytryptamine 2A receptor	HTR2A
MOL000358	beta-sitosterol	SJ3	Gamma-aminobutyric-acid receptor alpha-5 subunit	GABRA5
MOL000358	beta-sitosterol	SJ3	Alpha-1A adrenergic receptor	ADRA1A
MOL000358	beta-sitosterol	SJ3	Gamma-aminobutyric-acid receptor alpha-3 subunit	GABRA3
MOL000358	beta-sitosterol	SJ3	Muscarinic acetylcholine receptor M2	CHRM2
MOL000358	beta-sitosterol	SJ3	Alpha-1B adrenergic receptor	ADRA1B
MOL000358	beta-sitosterol	SJ3	Beta-2 adrenergic receptor	ADRB2
MOL000358	beta-sitosterol	SJ3	Neuronal acetylcholine receptor subunit alpha-2	CHRNA2
MOL000358	beta-sitosterol	SJ3	Sodium-dependent serotonin transporter	SLC6A4
MOL000358	beta-sitosterol	SJ3	Mu-type opioid receptor	OPRM1
MOL000358	beta-sitosterol	SJ3	Gamma-aminobutyric acid receptor subunit alpha-1	GABRA1
MOL000358	beta-sitosterol	SJ3	Neuronal acetylcholine receptor protein, alpha-7 chain	CHRNA7
MOL000358	beta-sitosterol	SJ3	Apoptosis regulator Bcl-2	BCL2
MOL000358	beta-sitosterol	SJ3	Apoptosis regulator BAX	BAX
MOL006129	6-methylgingediacetate2	SJ4	Estrogen receptor	ESR1
MOL006129	6-methylgingediacetate2	SJ4	Prostaglandin G/H synthase 2	PTGS2
MOL006129	6-methylgingediacetate2	SJ4	Calmodulin	CALM
MOL000066	alloaromadedrene	SJ5	Muscarinic acetylcholine receptor M3	CHRM3
MOL000066	alloaromadedrene	SJ5	Muscarinic acetylcholine receptor M2	CHRM2
MOL000066	alloaromadedrene	SJ5	Gamma-aminobutyric acid receptor subunit alpha-1	GABRA1
MOL000066	alloaromadedrene	SJ5	Muscarinic acetylcholine receptor M1	CHRM1
MOL000066	alloaromadedrene	SJ5	Neuronal acetylcholine receptor subunit alpha-2	CHRNA2
MOL000025	α-Longipinene	SJ6	Muscarinic acetylcholine receptor M3	CHRM3
MOL000025	α-Longipinene	SJ6	Prostaglandin G/H synthase 2	PTGS2
MOL000025	α-Longipinene	SJ6	Gamma-aminobutyric acid receptor subunit alpha-1	GABRA1
MOL000131	EIC	SJ7	Prostaglandin G/H synthase 1	PTGS1
MOL000131	EIC	SJ7	Prostaglandin G/H synthase 2	PTGS2
MOL000131	EIC	SJ7	Retinoic acid receptor RXR-alpha	RXRA
MOL000131	EIC	SJ7	Nuclear receptor coactivator 2	NCOA2
MOL000131	EIC	SJ7	Sodium-dependent noradrenaline transporter	SLC6A2
MOL000131	EIC	SJ7	Ig gamma-1 chain C region	IGHG1
MOL000131	EIC	SJ7	Gamma-aminobutyric-acid receptor alpha-2 subunit	GABRA2
MOL000131	EIC	SJ7	Gamma-aminobutyric acid receptor subunit alpha-1	GABRA1
MOL000131	EIC	SJ7	Transient receptor potential cation channel subfamily V member 1	TRPV1
MOL000131	EIC	SJ7	Muscarinic acetylcholine receptor M1	CHRM1
MOL000131	EIC	SJ7	Muscarinic acetylcholine receptor M2	CHRM2
MOL000131	EIC	SJ7	Gamma-aminobutyric-acid receptor subunit alpha-6	GABRA6
MOL000208	()-Aromadendrene	SJ8	Muscarinic acetylcholine receptor M3	CHRM3
MOL000208	()-Aromadendrene	SJ8	Muscarinic acetylcholine receptor M2	CHRM2
MOL000208	()-Aromadendrene	SJ8	Muscarinic acetylcholine receptor M1	CHRM1
MOL000208	()-Aromadendrene	SJ8	Alcohol dehydrogenase 1C	ADH1C
MOL000266	beta-Cubebene	SJ9	Muscarinic acetylcholine receptor M1	CHRM1
MOL000266	beta-Cubebene	SJ9	Muscarinic acetylcholine receptor M2	CHRM2
MOL000266	beta-Cubebene	SJ9	Gamma-aminobutyric acid receptor subunit alpha-1	GABRA1
MOL000266	beta-Cubebene	SJ9	Prostaglandin G/H synthase 2	PTGS2
MOL000266	beta-Cubebene	SJ9	Neuronal acetylcholine receptor subunit alpha-2	CHRNA2
MOL000266	beta-Cubebene	SJ9	Sodium-dependent noradrenaline transporter	SLC6A2
MOL000432	linolenic acid	SJ10	Prostaglandin G/H synthase 1	PTGS1
MOL000432	linolenic acid	SJ10	Prostaglandin G/H synthase 2	PTGS2
MOL000432	linolenic acid	SJ10	Retinoic acid receptor RXR-alpha	RXRA
MOL000432	linolenic acid	SJ10	Nuclear receptor coactivator 2	NCOA2
MOL000432	linolenic acid	SJ10	Retinoic acid receptor RXR-gamma	RXRG
MOL000432	linolenic acid	SJ10	Transient receptor potential cation channel subfamily V member 1	TRPV1
MOL000432	linolenic acid	SJ10	Transcription factor p65	RELA
MOL000432	linolenic acid	SJ10	Proliferating cell nuclear antigen	PCNA
MOL000432	linolenic acid	SJ10	Myc proto-oncogene protein	MYC
MOL000432	linolenic acid	SJ10	Calmodulin	CALM
MOL000432	linolenic acid	SJ10	Hepatocyte nuclear factor 4-alpha	HNF4A
MOL000432	linolenic acid	SJ10	Mitochondrial uncoupling protein 2	UCP2
MOL000432	linolenic acid	SJ10	Hepatocyte nuclear factor 1-alpha	HNF1A
MOL000432	linolenic acid	SJ10	Actin, cytoplasmic 1	ACTB
MOL000432	linolenic acid	SJ10	Tripartite motif-containing protein 26	TRIM26
MOL000432	linolenic acid	SJ10	Tripartite motif-containing protein 26	TRIM26
MOL000474	(-)-Epoxycaryophyllene	SJ11	Muscarinic acetylcholine receptor M3	CHRM3
MOL000474	(-)-Epoxycaryophyllene	SJ11	Muscarinic acetylcholine receptor M1	CHRM1
MOL000474	(-)-Epoxycaryophyllene	SJ11	Prostaglandin G/H synthase 2	PTGS2
MOL000474	(-)-Epoxycaryophyllene	SJ11	Acetylcholinesterase	ACHE
MOL000474	(-)-Epoxycaryophyllene	SJ11	Muscarinic acetylcholine receptor M2	CHRM2
MOL000474	(-)-Epoxycaryophyllene	SJ11	Alpha-1B adrenergic receptor	ADRA1B
MOL000474	(-)-Epoxycaryophyllene	SJ11	Gamma-aminobutyric acid receptor subunit alpha-1	GABRA1
MOL000474	(-)-Epoxycaryophyllene	SJ11	Dipeptidyl peptidase IV	DPP4
MOL000474	(-)-Epoxycaryophyllene	SJ11	Gamma-aminobutyric-acid receptor subunit alpha-6	GABRA6
MOL000612	(-)-alpha-cedrene	SJ12	Muscarinic acetylcholine receptor M3	CHRM3
MOL000612	(-)-alpha-cedrene	SJ12	Prostaglandin G/H synthase 2	PTGS2
MOL000612	(-)-alpha-cedrene	SJ12	Gamma-aminobutyric-acid receptor alpha-2 subunit	GABRA2
MOL000612	(-)-alpha-cedrene	SJ12	Retinoic acid receptor RXR-alpha	RXRA
MOL000612	(-)-alpha-cedrene	SJ12	Gamma-aminobutyric acid receptor subunit alpha-1	GABRA1
MOL000612	(-)-alpha-cedrene	SJ12	Nuclear receptor coactivator 2	NCOA2
MOL000612	(-)-alpha-cedrene	SJ12	Muscarinic acetylcholine receptor M1	CHRM1
MOL000612	(-)-alpha-cedrene	SJ12	Alcohol dehydrogenase 1B	ADH1B
MOL000612	(-)-alpha-cedrene	SJ12	Alcohol dehydrogenase 1C	ADH1C
MOL000676	DBP	SJ13	Muscarinic acetylcholine receptor M3	CHRM3
MOL000676	DBP	SJ13	Muscarinic acetylcholine receptor M1	CHRM1
MOL000676	DBP	SJ13	Sodium-dependent noradrenaline transporter	SLC6A2
MOL000676	DBP	SJ13	Sodium-dependent dopamine transporter	SLC6A3
MOL000676	DBP	SJ13	Beta-2 adrenergic receptor	ADRB2
MOL000676	DBP	SJ13	Sodium-dependent serotonin transporter	SLC6A4
MOL000676	DBP	SJ13	Prostaglandin G/H synthase 1	PTGS1
MOL000676	DBP	SJ13	Prostaglandin G/H synthase 2	PTGS2
MOL000676	DBP	SJ13	Nitric-oxide synthase, endothelial	NOS3
MOL000676	DBP	SJ13	Retinoic acid receptor RXR-alpha	RXRA
MOL000676	DBP	SJ13	Glycogen synthase kinase-3 beta	GSK3B
MOL000676	DBP	SJ13	Heat shock protein HSP 90	HSP83
MOL000676	DBP	SJ13	CGMP-inhibited 3',5'-cyclic phosphodiesterase A	PDE3A
MOL000676	DBP	SJ13	Alpha-1A adrenergic receptor	ADRA1A
MOL000676	DBP	SJ13	Muscarinic acetylcholine receptor M2	CHRM2
MOL000676	DBP	SJ13	Ig gamma-1 chain C region	IGHG1
MOL000676	DBP	SJ13	5-hydroxytryptamine 2A receptor	HTR2A
MOL000676	DBP	SJ13	Gamma-aminobutyric acid receptor subunit alpha-1	GABRA1
MOL000676	DBP	SJ13	Neuronal acetylcholine receptor protein, alpha-7 chain	CHRNA7
MOL000676	DBP	SJ13	Gamma-aminobutyric-acid receptor subunit alpha-6	GABRA6
MOL000935	Hepanal	SJ14	Muscarinic acetylcholine receptor M3	CHRM3
MOL000935	Hepanal	SJ14	Muscarinic acetylcholine receptor M2	CHRM2
MOL000935	Hepanal	SJ14	Alcohol dehydrogenase 1C	ADH1C
MOL000935	Hepanal	SJ14	Ig gamma-1 chain C region	IGHG1
MOL000938	calarene	SJ15	Muscarinic acetylcholine receptor M1	CHRM1
MOL000938	calarene	SJ15	Gamma-aminobutyric-acid receptor alpha-2 subunit	GABRA2
MOL000938	calarene	SJ15	Gamma-aminobutyric-acid receptor alpha-5 subunit	GABRA5
MOL000938	calarene	SJ15	Gamma-aminobutyric-acid receptor alpha-3 subunit	GABRA3
MOL000938	calarene	SJ15	Gamma-aminobutyric acid receptor subunit alpha-1	GABRA1
MOL000938	calarene	SJ15	Glutamate receptor 2	GRIA2
MOL000938	calarene	SJ15	Gamma-aminobutyric-acid receptor subunit alpha-6	GABRA6
MOL000938	calarene	SJ15	Sodium-dependent noradrenaline transporter	SLC6A2
MOL000938	calarene	SJ15	Muscarinic acetylcholine receptor M2	CHRM2
MOL001179	(&#8722;)-Alloaromadendrene	SJ16	Muscarinic acetylcholine receptor M3	CHRM3
MOL001179	(&#8722;)-Alloaromadendrene	SJ16	Muscarinic acetylcholine receptor M1	CHRM1
MOL001179	(&#8722;)-Alloaromadendrene	SJ16	Muscarinic acetylcholine receptor M2	CHRM2
MOL001179	(&#8722;)-Alloaromadendrene	SJ16	Alpha-1B adrenergic receptor	ADRA1B
MOL001179	(&#8722;)-Alloaromadendrene	SJ16	Neuronal acetylcholine receptor subunit alpha-2	CHRNA2
MOL001179	(&#8722;)-Alloaromadendrene	SJ16	Nuclear receptor coactivator 2	NCOA2
MOL001179	(&#8722;)-Alloaromadendrene	SJ16	Dopamine D1 receptor	DRD1
MOL001179	(&#8722;)-Alloaromadendrene	SJ16	Beta-1 adrenergic receptor	ADRB1
MOL001179	(&#8722;)-Alloaromadendrene	SJ16	Retinoic acid receptor RXR-alpha	RXRA
MOL001179	(&#8722;)-Alloaromadendrene	SJ16	5-hydroxytryptamine 2A receptor	HTR2A
MOL001179	(&#8722;)-Alloaromadendrene	SJ16	Sodium-dependent noradrenaline transporter	SLC6A2
MOL001179	(&#8722;)-Alloaromadendrene	SJ16	Alpha-1A adrenergic receptor	ADRA1A
MOL001179	(&#8722;)-Alloaromadendrene	SJ16	Gamma-aminobutyric-acid receptor alpha-3 subunit	GABRA3
MOL001179	(&#8722;)-Alloaromadendrene	SJ16	Sodium-dependent dopamine transporter	SLC6A3
MOL001179	(&#8722;)-Alloaromadendrene	SJ16	Beta-2 adrenergic receptor	ADRB2
MOL001179	(&#8722;)-Alloaromadendrene	SJ16	Gamma-aminobutyric acid receptor subunit alpha-1	GABRA1
MOL001179	(&#8722;)-Alloaromadendrene	SJ16	Neuronal acetylcholine receptor protein, alpha-7 chain	CHRNA7
MOL001390	49070_FLUKA	SJ17	Muscarinic acetylcholine receptor M3	CHRM3
MOL001390	49070_FLUKA	SJ17	Muscarinic acetylcholine receptor M1	CHRM1
MOL001390	49070_FLUKA	SJ17	Muscarinic acetylcholine receptor M2	CHRM2
MOL001390	49070_FLUKA	SJ17	Gamma-aminobutyric acid receptor subunit alpha-1	GABRA1
MOL001390	49070_FLUKA	SJ17	Prostaglandin G/H synthase 2	PTGS2
MOL001390	49070_FLUKA	SJ17	Alcohol dehydrogenase 1C	ADH1C
MOL001771	poriferast-5-en-3beta-ol	SJ18	Progesterone receptor	PGR
MOL001771	poriferast-5-en-3beta-ol	SJ18	Nuclear receptor coactivator 2	NCOA2
MOL002153	1H-Cycloprop(e)azulen-7-ol, decahydro-1,1,7-trimethyl-4-methylene-, (1aR-(1aalpha,4aalpha,7beta,7abeta,7balpha))-	SJ19	Muscarinic acetylcholine receptor M3	CHRM3
MOL002153	1H-Cycloprop(e)azulen-7-ol, decahydro-1,1,7-trimethyl-4-methylene-, (1aR-(1aalpha,4aalpha,7beta,7abeta,7balpha))-	SJ19	Muscarinic acetylcholine receptor M1	CHRM1
MOL002153	1H-Cycloprop(e)azulen-7-ol, decahydro-1,1,7-trimethyl-4-methylene-, (1aR-(1aalpha,4aalpha,7beta,7abeta,7balpha))-	SJ19	Muscarinic acetylcholine receptor M2	CHRM2
MOL002153	1H-Cycloprop(e)azulen-7-ol, decahydro-1,1,7-trimethyl-4-methylene-, (1aR-(1aalpha,4aalpha,7beta,7abeta,7balpha))-	SJ19	Gamma-aminobutyric acid receptor subunit alpha-1	GABRA1
MOL002153	1H-Cycloprop(e)azulen-7-ol, decahydro-1,1,7-trimethyl-4-methylene-, (1aR-(1aalpha,4aalpha,7beta,7abeta,7balpha))-	SJ19	Gamma-aminobutyric-acid receptor subunit alpha-6	GABRA6
MOL002186	Aromadendrene oxide 2	SJ20	Muscarinic acetylcholine receptor M3	CHRM3
MOL002186	Aromadendrene oxide 2	SJ20	Muscarinic acetylcholine receptor M1	CHRM1
MOL002186	Aromadendrene oxide 2	SJ20	Muscarinic acetylcholine receptor M2	CHRM2
MOL002186	Aromadendrene oxide 2	SJ20	Gamma-aminobutyric acid receptor subunit alpha-1	GABRA1
MOL002335	beta-Gurjunene	SJ21	Muscarinic acetylcholine receptor M3	CHRM3
MOL002335	beta-Gurjunene	SJ21	Muscarinic acetylcholine receptor M1	CHRM1
MOL002335	beta-Gurjunene	SJ21	Muscarinic acetylcholine receptor M2	CHRM2
MOL002335	beta-Gurjunene	SJ21	Alpha-1B adrenergic receptor	ADRA1B
MOL002335	beta-Gurjunene	SJ21	Gamma-aminobutyric acid receptor subunit alpha-1	GABRA1
MOL002335	beta-Gurjunene	SJ21	Neuronal acetylcholine receptor subunit alpha-2	CHRNA2
MOL002573	β-patchoulene	SJ22	Muscarinic acetylcholine receptor M3	CHRM3
MOL002573	β-patchoulene	SJ22	Prostaglandin G/H synthase 2	PTGS2
MOL002573	β-patchoulene	SJ22	Gamma-aminobutyric acid receptor subunit alpha-1	GABRA1
MOL002573	β-patchoulene	SJ22	Nuclear receptor coactivator 2	NCOA2
MOL002573	β-patchoulene	SJ22	Gamma-aminobutyric-acid receptor alpha-2 subunit	GABRA2
MOL002573	β-patchoulene	SJ22	Gamma-aminobutyric-acid receptor subunit alpha-6	GABRA6
MOL003358	Euxanthone	SJ23	Prostaglandin G/H synthase 1	PTGS1
MOL003358	Euxanthone	SJ23	Peroxisome proliferator activated receptor gamma	PPARG
MOL003358	Euxanthone	SJ23	Prostaglandin G/H synthase 2	PTGS2
MOL003358	Euxanthone	SJ23	Nitric-oxide synthase, endothelial	NOS3
MOL003358	Euxanthone	SJ23	CGMP-inhibited 3',5'-cyclic phosphodiesterase A	PDE3A
MOL003358	Euxanthone	SJ23	Dipeptidyl peptidase IV	DPP4
MOL003358	Euxanthone	SJ23	Heat shock protein HSP 90	HSP83
MOL003358	Euxanthone	SJ23	Leukotriene A-4 hydrolase	LTA4H
MOL003358	Euxanthone	SJ23	Amine oxidase [flavin-containing] B	MAOB
MOL003358	Euxanthone	SJ23	Serine/threonine-protein kinase Chk1	CHEK1
MOL003358	Euxanthone	SJ23	Nuclear receptor coactivator 2	NCOA2
MOL003358	Euxanthone	SJ23	cAMP-dependent protein kinase inhibitor alpha	PKIA
MOL003575	α-Panasinsene	SJ24	Muscarinic acetylcholine receptor M3	CHRM3
MOL003575	α-Panasinsene	SJ24	Muscarinic acetylcholine receptor M2	CHRM2
MOL003978	(3R,6E,10E)-3,7,11,15-tetramethylhexadeca-1,6,10,14-tetraen-3-ol	SJ25	Prostaglandin G/H synthase 2	PTGS2
MOL003978	(3R,6E,10E)-3,7,11,15-tetramethylhexadeca-1,6,10,14-tetraen-3-ol	SJ25	Nuclear receptor coactivator 2	NCOA2
MOL005743	Proximadiol	SJ26	Gamma-aminobutyric acid receptor subunit alpha-1	GABRA1
MOL005743	Proximadiol	SJ26	Gamma-aminobutyric-acid receptor subunit alpha-6	GABRA6
MOL005964	β-panasinsene	SJ27	Muscarinic acetylcholine receptor M3	CHRM3
MOL005964	β-panasinsene	SJ27	Prostaglandin G/H synthase 2	PTGS2
MOL005964	β-panasinsene	SJ27	Muscarinic acetylcholine receptor M2	CHRM2
MOL010380	()-alpha-Funebrene	SJ28	Muscarinic acetylcholine receptor M3	CHRM3
MOL010380	()-alpha-Funebrene	SJ28	Muscarinic acetylcholine receptor M1	CHRM1
MOL010380	()-alpha-Funebrene	SJ28	Prostaglandin G/H synthase 2	PTGS2
MOL010380	()-alpha-Funebrene	SJ28	Retinoic acid receptor RXR-alpha	RXRA
MOL010380	()-alpha-Funebrene	SJ28	Muscarinic acetylcholine receptor M2	CHRM2
MOL010380	()-alpha-Funebrene	SJ28	Gamma-aminobutyric acid receptor subunit alpha-1	GABRA1
MOL010380	()-alpha-Funebrene	SJ28	Nuclear receptor coactivator 2	NCOA2
MOL010380	()-alpha-Funebrene	SJ28	Gamma-aminobutyric-acid receptor alpha-2 subunit	GABRA2
MOL010380	()-alpha-Funebrene	SJ28	Gamma-aminobutyric-acid receptor subunit alpha-6	GABRA6

## Sheet: DZ
MOLID	ingredients	Abbreviated ID	Target gene	Target gene
MOL011039	Vaccenic acid	DZ1	Ig gamma-1 chain C region	IGHG1
MOL011039	Vaccenic acid	DZ1	Nuclear receptor coactivator 2	NCOA2
MOL011039	Vaccenic acid	DZ1	Prostaglandin G/H synthase 1	PTGS1
MOL012921	stepharine	DZ2	Prostaglandin G/H synthase 1	PTGS1
MOL012921	stepharine	DZ2	Dopamine D1 receptor	DRD1
MOL012921	stepharine	DZ2	Muscarinic acetylcholine receptor M3	CHRM3
MOL012921	stepharine	DZ2	Muscarinic acetylcholine receptor M1	CHRM1
MOL012921	stepharine	DZ2	D(1B) dopamine receptor	DRD5
MOL012921	stepharine	DZ2	Sodium channel protein type 5 subunit alpha	SCN5A
MOL012921	stepharine	DZ2	Muscarinic acetylcholine receptor M5	CHRM5
MOL012921	stepharine	DZ2	Prostaglandin G/H synthase 2	PTGS2
MOL012921	stepharine	DZ2	5-hydroxytryptamine receptor 3A	HTR3A
MOL012921	stepharine	DZ2	Muscarinic acetylcholine receptor M4	CHRM4
MOL012921	stepharine	DZ2	Retinoic acid receptor RXR-alpha	RXRA
MOL012921	stepharine	DZ2	Delta-type opioid receptor	OPRD1
MOL012921	stepharine	DZ2	5-hydroxytryptamine 2A receptor	HTR2A
MOL012921	stepharine	DZ2	Sodium-dependent noradrenaline transporter	SLC6A2
MOL012921	stepharine	DZ2	Alpha-1A adrenergic receptor	ADRA1A
MOL012921	stepharine	DZ2	Gamma-aminobutyric-acid receptor alpha-3 subunit	GABRA3
MOL012921	stepharine	DZ2	Muscarinic acetylcholine receptor M2	CHRM2
MOL012921	stepharine	DZ2	Alpha-2B adrenergic receptor	ADRA2B
MOL012921	stepharine	DZ2	Alpha-1B adrenergic receptor	ADRA1B
MOL012921	stepharine	DZ2	Sodium-dependent dopamine transporter	SLC6A3
MOL012921	stepharine	DZ2	Beta-2 adrenergic receptor	ADRB2
MOL012921	stepharine	DZ2	Neuronal acetylcholine receptor subunit alpha-2	CHRNA2
MOL012921	stepharine	DZ2	Sodium-dependent serotonin transporter	SLC6A4
MOL012921	stepharine	DZ2	D(2) dopamine receptor	DRD2
MOL012921	stepharine	DZ2	Mu-type opioid receptor	OPRM1
MOL012921	stepharine	DZ2	Gamma-aminobutyric acid receptor subunit alpha-1	GABRA1
MOL012921	stepharine	DZ2	Neuronal acetylcholine receptor protein, alpha-7 chain	CHRNA7
MOL012973	Adouetine X	DZ3	Coagulation factor Xa	#N/A
MOL012974	Asimilobine	DZ3	Prostaglandin G/H synthase 1	PTGS1
MOL012974	Asimilobine	DZ3	Muscarinic acetylcholine receptor M3	CHRM3
MOL012974	Asimilobine	DZ3	Muscarinic acetylcholine receptor M1	CHRM1
MOL012974	Asimilobine	DZ3	Sodium channel protein type 5 subunit alpha	SCN5A
MOL012974	Asimilobine	DZ3	Muscarinic acetylcholine receptor M5	CHRM5
MOL012974	Asimilobine	DZ3	Prostaglandin G/H synthase 2	PTGS2
MOL012974	Asimilobine	DZ3	Muscarinic acetylcholine receptor M4	CHRM4
MOL012974	Asimilobine	DZ3	Retinoic acid receptor RXR-alpha	RXRA
MOL012974	Asimilobine	DZ3	Delta-type opioid receptor	OPRD1
MOL012974	Asimilobine	DZ3	Alpha-1A adrenergic receptor	ADRA1A
MOL012974	Asimilobine	DZ3	Alpha-1B adrenergic receptor	ADRA1B
MOL012974	Asimilobine	DZ3	Sodium-dependent dopamine transporter	SLC6A3
MOL012974	Asimilobine	DZ3	Beta-2 adrenergic receptor	ADRB2
MOL012974	Asimilobine	DZ3	Alpha-1D adrenergic receptor	ADRA1D
MOL012974	Asimilobine	DZ3	Mu-type opioid receptor	OPRM1
MOL012974	Asimilobine	DZ3	Heat shock protein HSP 90	HSP83
MOL012974	Asimilobine	DZ3	Phosphatidylinositol-4,5-bisphosphate 3-kinase catalytic subunit, gamma isoform	PIK3CG
MOL012974	Asimilobine	DZ3	Neuronal acetylcholine receptor protein, alpha-7 chain	CHRNA7
MOL012976	coumestrol	DZ4	Peroxisome proliferator activated receptor gamma	PPARG
MOL012976	coumestrol	DZ4	Prostaglandin G/H synthase 2	PTGS2
MOL012976	coumestrol	DZ4	Heat shock protein HSP 90	HSP83
MOL012976	coumestrol	DZ4	Phosphatidylinositol-4,5-bisphosphate 3-kinase catalytic subunit, gamma isoform	PIK3CG
MOL012976	coumestrol	DZ4	Cytochrome P450 3A4	CYP3A4
MOL012976	coumestrol	DZ4	Nuclear receptor subfamily 1 group I member 2	NR1I2
MOL012976	coumestrol	DZ4	Cytochrome P450 2B6	CYP2B6
MOL012976	coumestrol	DZ4	Hsp90 co-chaperone Cdc37	CDC37
MOL012992	Mauritine D	DZ5	Sodium channel protein type 5 subunit alpha	SCN5A
MOL012992	Mauritine D	DZ5	Prostaglandin G/H synthase 2	PTGS2
MOL012992	Mauritine D	DZ5	Heat shock protein HSP 90	HSP83
MOL001454	berberine	DZ6	Nitric oxide synthase, inducible	NOS2
MOL001454	berberine	DZ6	Prostaglandin G/H synthase 1	PTGS1
MOL001454	berberine	DZ6	Potassium voltage-gated channel subfamily H member 2	KCNH2
MOL001454	berberine	DZ6	Estrogen receptor	ESR1
MOL001454	berberine	DZ6	Androgen receptor	AR
MOL001454	berberine	DZ6	Sodium channel protein type 5 subunit alpha	SCN5A
MOL001454	berberine	DZ6	Coagulation factor Xa	#N/A
MOL001454	berberine	DZ6	Prostaglandin G/H synthase 2	PTGS2
MOL001454	berberine	DZ6	Nitric-oxide synthase, endothelial	NOS3
MOL001454	berberine	DZ6	Retinoic acid receptor RXR-alpha	RXRA
MOL001454	berberine	DZ6	Beta-2 adrenergic receptor	ADRB2
MOL001454	berberine	DZ6	Heat shock protein HSP 90	HSP83
MOL001454	berberine	DZ6	mRNA of PKA Catalytic Subunit C-alpha	#N/A
MOL001454	berberine	DZ6	Trypsin-1	PRSS1
MOL001454	berberine	DZ6	Nuclear receptor coactivator 2	NCOA2
MOL001454	berberine	DZ6	cAMP and cAMP-inhibited cGMP 3',5'-cyclic phosphodiesterase 10A	PDE10A
MOL001454	berberine	DZ6	Calmodulin	CALM
MOL001522	(S)-Coclaurine	DZ7	Prostaglandin G/H synthase 1	PTGS1
MOL001522	(S)-Coclaurine	DZ7	Muscarinic acetylcholine receptor M1	CHRM1
MOL001522	(S)-Coclaurine	DZ7	Sodium channel protein type 5 subunit alpha	SCN5A
MOL001522	(S)-Coclaurine	DZ7	Prostaglandin G/H synthase 2	PTGS2
MOL001522	(S)-Coclaurine	DZ7	Retinoic acid receptor RXR-alpha	RXRA
MOL001522	(S)-Coclaurine	DZ7	CGMP-inhibited 3',5'-cyclic phosphodiesterase A	PDE3A
MOL001522	(S)-Coclaurine	DZ7	Alpha-1A adrenergic receptor	ADRA1A
MOL001522	(S)-Coclaurine	DZ7	Alpha-1B adrenergic receptor	ADRA1B
MOL001522	(S)-Coclaurine	DZ7	Sodium-dependent dopamine transporter	SLC6A3
MOL001522	(S)-Coclaurine	DZ7	Beta-2 adrenergic receptor	ADRB2
MOL001522	(S)-Coclaurine	DZ7	Sodium-dependent serotonin transporter	SLC6A4
MOL001522	(S)-Coclaurine	DZ7	Heat shock protein HSP 90	HSP83
MOL001522	(S)-Coclaurine	DZ7	Amine oxidase [flavin-containing] B	MAOB
MOL001522	(S)-Coclaurine	DZ7	Calmodulin	CALM
MOL001522	(S)-Coclaurine	DZ7	Dopamine D1 receptor	DRD1
MOL001522	(S)-Coclaurine	DZ7	Muscarinic acetylcholine receptor M3	CHRM3
MOL001522	(S)-Coclaurine	DZ7	Alpha-2A adrenergic receptor	ADRA2A
MOL001522	(S)-Coclaurine	DZ7	Carbonic anhydrase II	CA2
MOL001522	(S)-Coclaurine	DZ7	Alpha-2C adrenergic receptor	ADRA2C
MOL001522	(S)-Coclaurine	DZ7	Alpha-1D adrenergic receptor	ADRA1D
MOL001522	(S)-Coclaurine	DZ7	Mu-type opioid receptor	OPRM1
MOL001522	(S)-Coclaurine	DZ7	mRNA of PKA Catalytic Subunit C-alpha	#N/A
MOL001522	(S)-Coclaurine	DZ7	Nuclear receptor coactivator 2	NCOA2
MOL000263	oleanolic acid	DZ8	Caspase-9	CASP9
MOL000263	oleanolic acid	DZ8	Caspase-3	CASP3
MOL000263	oleanolic acid	DZ8	Heme oxygenase 1	HMOX1
MOL000263	oleanolic acid	DZ8	Intercellular adhesion molecule 1	ICAM1
MOL000263	oleanolic acid	DZ8	NAD(P)H dehydrogenase [quinone] 1	NQO1
MOL000263	oleanolic acid	DZ8	Pancreatic alpha-amylase	AMY2A
MOL000449	Stigmasterol	DZ9	Progesterone receptor	PGR
MOL000449	Stigmasterol	DZ9	Mineralocorticoid receptor	NR3C2
MOL000449	Stigmasterol	DZ9	Nuclear receptor coactivator 2	NCOA2
MOL000449	Stigmasterol	DZ9	Alcohol dehydrogenase 1C	ADH1C
MOL000449	Stigmasterol	DZ9	Ig gamma-1 chain C region	IGHG1
MOL000449	Stigmasterol	DZ9	Retinoic acid receptor RXR-alpha	RXRA
MOL000449	Stigmasterol	DZ9	Nuclear receptor coactivator 1	NCOA1
MOL000449	Stigmasterol	DZ9	Prostaglandin G/H synthase 1	PTGS1
MOL000449	Stigmasterol	DZ9	Prostaglandin G/H synthase 2	PTGS2
MOL000449	Stigmasterol	DZ9	Alpha-2A adrenergic receptor	ADRA2A
MOL000449	Stigmasterol	DZ9	Sodium-dependent noradrenaline transporter	SLC6A2
MOL000449	Stigmasterol	DZ9	Sodium-dependent dopamine transporter	SLC6A3
MOL000449	Stigmasterol	DZ9	Beta-2 adrenergic receptor	ADRB2
MOL000449	Stigmasterol	DZ9	Aldose reductase	AKR1B1
MOL000449	Stigmasterol	DZ9	Urokinase-type plasminogen activator	PLAU
MOL000449	Stigmasterol	DZ9	Leukotriene A-4 hydrolase	LTA4H
MOL000449	Stigmasterol	DZ9	Amine oxidase [flavin-containing] B	MAOB
MOL000449	Stigmasterol	DZ9	Amine oxidase [flavin-containing] A	MAOA
MOL000449	Stigmasterol	DZ9	mRNA of PKA Catalytic Subunit C-alpha	#N/A
MOL000449	Stigmasterol	DZ9	Chymotrypsinogen B	CTRB1
MOL000449	Stigmasterol	DZ9	Muscarinic acetylcholine receptor M3	CHRM3
MOL000449	Stigmasterol	DZ9	Muscarinic acetylcholine receptor M1	CHRM1
MOL000449	Stigmasterol	DZ9	Beta-1 adrenergic receptor	ADRB1
MOL000449	Stigmasterol	DZ9	Sodium channel protein type 5 subunit alpha	SCN5A
MOL000449	Stigmasterol	DZ9	5-hydroxytryptamine 2A receptor	HTR2A
MOL000449	Stigmasterol	DZ9	Alpha-1A adrenergic receptor	ADRA1A
MOL000449	Stigmasterol	DZ9	Gamma-aminobutyric-acid receptor alpha-3 subunit	GABRA3
MOL000449	Stigmasterol	DZ9	Muscarinic acetylcholine receptor M2	CHRM2
MOL000449	Stigmasterol	DZ9	Alpha-1B adrenergic receptor	ADRA1B
MOL000449	Stigmasterol	DZ9	Gamma-aminobutyric acid receptor subunit alpha-1	GABRA1
MOL000449	Stigmasterol	DZ9	Neuronal acetylcholine receptor protein, alpha-7 chain	CHRNA7
MOL000358	beta-sitosterol	DZ10	Progesterone receptor	PGR
MOL000358	beta-sitosterol	DZ10	Nuclear receptor coactivator 2	NCOA2
MOL000358	beta-sitosterol	DZ10	Prostaglandin G/H synthase 1	PTGS1
MOL000358	beta-sitosterol	DZ10	Prostaglandin G/H synthase 2	PTGS2
MOL000358	beta-sitosterol	DZ10	Heat shock protein HSP 90	HSP83
MOL000358	beta-sitosterol	DZ10	Phosphatidylinositol-4,5-bisphosphate 3-kinase catalytic subunit, gamma isoform	PIK3CG
MOL000358	beta-sitosterol	DZ10	Potassium voltage-gated channel subfamily H member 2	KCNH2
MOL000358	beta-sitosterol	DZ10	mRNA of PKA Catalytic Subunit C-alpha	#N/A
MOL000358	beta-sitosterol	DZ10	Dopamine D1 receptor	DRD1
MOL000358	beta-sitosterol	DZ10	Muscarinic acetylcholine receptor M3	CHRM3
MOL000358	beta-sitosterol	DZ10	Muscarinic acetylcholine receptor M1	CHRM1
MOL000358	beta-sitosterol	DZ10	Sodium channel protein type 5 subunit alpha	SCN5A
MOL000358	beta-sitosterol	DZ10	Gamma-aminobutyric-acid receptor alpha-2 subunit	GABRA2
MOL000358	beta-sitosterol	DZ10	Muscarinic acetylcholine receptor M4	CHRM4
MOL000358	beta-sitosterol	DZ10	CGMP-inhibited 3',5'-cyclic phosphodiesterase A	PDE3A
MOL000358	beta-sitosterol	DZ10	5-hydroxytryptamine 2A receptor	HTR2A
MOL000358	beta-sitosterol	DZ10	Gamma-aminobutyric-acid receptor alpha-5 subunit	GABRA5
MOL000358	beta-sitosterol	DZ10	Alpha-1A adrenergic receptor	ADRA1A
MOL000358	beta-sitosterol	DZ10	Gamma-aminobutyric-acid receptor alpha-3 subunit	GABRA3
MOL000358	beta-sitosterol	DZ10	Muscarinic acetylcholine receptor M2	CHRM2
MOL000358	beta-sitosterol	DZ10	Alpha-1B adrenergic receptor	ADRA1B
MOL000358	beta-sitosterol	DZ10	Beta-2 adrenergic receptor	ADRB2
MOL000358	beta-sitosterol	DZ10	Neuronal acetylcholine receptor subunit alpha-2	CHRNA2
MOL000358	beta-sitosterol	DZ10	Sodium-dependent serotonin transporter	SLC6A4
MOL000358	beta-sitosterol	DZ10	Mu-type opioid receptor	OPRM1
MOL000358	beta-sitosterol	DZ10	Gamma-aminobutyric acid receptor subunit alpha-1	GABRA1
MOL000358	beta-sitosterol	DZ10	Neuronal acetylcholine receptor protein, alpha-7 chain	CHRNA7
MOL000358	beta-sitosterol	DZ10	Cytochrome P450-cam	#N/A
MOL000358	beta-sitosterol	DZ10	Apoptosis regulator Bcl-2	BCL2
MOL000358	beta-sitosterol	DZ10	Apoptosis regulator BAX	BAX
MOL000358	beta-sitosterol	DZ10	Caspase-9	CASP9
MOL000358	beta-sitosterol	DZ10	Transcription factor AP-1	#N/A
MOL000358	beta-sitosterol	DZ10	Caspase-3	CASP3
MOL000358	beta-sitosterol	DZ10	Caspase-8	CASP8
MOL000358	beta-sitosterol	DZ10	Protein kinase C alpha type	PRKCA
MOL000358	beta-sitosterol	DZ10	Transforming growth factor beta-1	TGFB1
MOL000358	beta-sitosterol	DZ10	Serum paraoxonase/arylesterase 1	PON1
MOL000358	beta-sitosterol	DZ10	Microtubule-associated protein 2	MAP2
MOL004350	Ruvoside_qt	DZ11	Mineralocorticoid receptor	NR3C2
MOL004350	Ruvoside_qt	DZ11	Nuclear receptor coactivator 1	NCOA1
MOL000492	(+)-catechin	DZ12	Prostaglandin G/H synthase 1	PTGS1
MOL000492	(+)-catechin	DZ12	Estrogen receptor	ESR1
MOL000492	(+)-catechin	DZ12	Prostaglandin G/H synthase 2	PTGS2
MOL000492	(+)-catechin	DZ12	Heat shock protein HSP 90	HSP83
MOL000492	(+)-catechin	DZ12	Beta-lactamase	#N/A
MOL000492	(+)-catechin	DZ12	mRNA of PKA Catalytic Subunit C-alpha	#N/A
MOL000492	(+)-catechin	DZ12	Nuclear receptor coactivator 2	NCOA2
MOL000492	(+)-catechin	DZ12	Calmodulin	CALM
MOL000492	(+)-catechin	DZ12	Retinoic acid receptor RXR-alpha	RXRA
MOL000492	(+)-catechin	DZ12	Catalase	CAT
MOL000492	(+)-catechin	DZ12	Hyaluronan synthase 2	HAS2
MOL005386	Vulgarin	DZ13	Acetylcholinesterase	ACHE
MOL005386	Vulgarin	DZ13	Gamma-aminobutyric acid receptor subunit alpha-1	GABRA1
MOL000627	Stepholidine	DZ14	Prostaglandin G/H synthase 1	PTGS1
MOL000627	Stepholidine	DZ14	Dopamine D1 receptor	DRD1
MOL000627	Stepholidine	DZ14	Muscarinic acetylcholine receptor M3	CHRM3
MOL000627	Stepholidine	DZ14	Potassium voltage-gated channel subfamily H member 2	KCNH2
MOL000627	Stepholidine	DZ14	Muscarinic acetylcholine receptor M1	CHRM1
MOL000627	Stepholidine	DZ14	D(1B) dopamine receptor	DRD5
MOL000627	Stepholidine	DZ14	Sodium channel protein type 5 subunit alpha	SCN5A
MOL000627	Stepholidine	DZ14	Coagulation factor Xa	#N/A
MOL000627	Stepholidine	DZ14	Muscarinic acetylcholine receptor M5	CHRM5
MOL000627	Stepholidine	DZ14	Prostaglandin G/H synthase 2	PTGS2
MOL000627	Stepholidine	DZ14	Carbonic anhydrase II	CA2
MOL000627	Stepholidine	DZ14	Alpha-2C adrenergic receptor	ADRA2C
MOL000627	Stepholidine	DZ14	D(4) dopamine receptor	DRD4
MOL000627	Stepholidine	DZ14	Muscarinic acetylcholine receptor M4	CHRM4
MOL000627	Stepholidine	DZ14	Retinoic acid receptor RXR-alpha	RXRA
MOL000627	Stepholidine	DZ14	Delta-type opioid receptor	OPRD1
MOL000627	Stepholidine	DZ14	5-hydroxytryptamine 2A receptor	HTR2A
MOL000627	Stepholidine	DZ14	5-hydroxytryptamine 2C receptor	HTR2C
MOL000627	Stepholidine	DZ14	Muscarinic acetylcholine receptor M2	CHRM2
MOL000627	Stepholidine	DZ14	Alpha-2B adrenergic receptor	ADRA2B
MOL000627	Stepholidine	DZ14	Alpha-1B adrenergic receptor	ADRA1B
MOL000627	Stepholidine	DZ14	Sodium-dependent dopamine transporter	SLC6A3
MOL000627	Stepholidine	DZ14	Beta-2 adrenergic receptor	ADRB2
MOL000627	Stepholidine	DZ14	Alpha-1D adrenergic receptor	ADRA1D
MOL000627	Stepholidine	DZ14	Sodium-dependent serotonin transporter	SLC6A4
MOL000627	Stepholidine	DZ14	Mu-type opioid receptor	OPRM1
MOL000627	Stepholidine	DZ14	Heat shock protein HSP 90	HSP83
MOL000627	Stepholidine	DZ14	Calmodulin	CALM
MOL000627	Stepholidine	DZ14	mRNA of PKA Catalytic Subunit C-alpha	#N/A
MOL000675	oleic acid	DZ15	Prostaglandin G/H synthase 1	PTGS1
MOL000675	oleic acid	DZ15	Nuclear receptor coactivator 2	NCOA2
MOL000675	oleic acid	DZ15	Prostaglandin G/H synthase 2	PTGS2
MOL000675	oleic acid	DZ15	Alcohol dehydrogenase 1B	ADH1B
MOL000675	oleic acid	DZ15	Alcohol dehydrogenase 1C	ADH1C
MOL000675	oleic acid	DZ15	Alcohol dehydrogenase 1A	ADH1A
MOL000675	oleic acid	DZ15	Lysozyme	#N/A
MOL000675	oleic acid	DZ15	Nicotinate-nucleotide--dimethylbenzimidazole phosphoribosyltransferase	#N/A
MOL000675	oleic acid	DZ15	Trypsin-3	PRSS3
MOL000675	oleic acid	DZ15	Retinoic acid receptor RXR-alpha	RXRA
MOL000675	oleic acid	DZ15	Cytochrome P450-cam	#N/A
MOL000675	oleic acid	DZ15	Urokinase-type plasminogen activator	PLAU
MOL000675	oleic acid	DZ15	Superoxide dismutase [Cu-Zn]	SOD1
MOL000675	oleic acid	DZ15	Catalase	CAT
MOL000675	oleic acid	DZ15	Telomerase protein component 1	TEP1
MOL000675	oleic acid	DZ15	Endothelin-1	EDN1
MOL000675	oleic acid	DZ15	Receptor tyrosine-protein kinase erbB-2	ERBB2
MOL000675	oleic acid	DZ15	Peroxisome proliferator-activated receptor gamma	PPARG
MOL000675	oleic acid	DZ15	Lipoprotein lipase	LPL
MOL000675	oleic acid	DZ15	Neuromodulin	GAP43
MOL000675	oleic acid	DZ15	Plasminogen activator inhibitor 1	SERPINE1
MOL000675	oleic acid	DZ15	Brain-derived neurotrophic factor	BDNF
MOL000675	oleic acid	DZ15	3-hydroxy-3-methylglutaryl-coenzyme A reductase	HMGCR
MOL000675	oleic acid	DZ15	Myeloperoxidase	MPO
MOL000675	oleic acid	DZ15	Peroxisome proliferator-activated receptor alpha	PPARA
MOL000675	oleic acid	DZ15	Peroxisome proliferator-activated receptor delta	PPARD
MOL000675	oleic acid	DZ15	C-reactive protein	CRP
MOL000675	oleic acid	DZ15	Serum paraoxonase/arylesterase 1	PON1
MOL000675	oleic acid	DZ15	Insulin	INS
MOL000675	oleic acid	DZ15	Plasminogen	PLG
MOL000675	oleic acid	DZ15	Fatty acid-binding protein, liver	FABP1
MOL000675	oleic acid	DZ15	Retinol-binding protein 2	RBP2
MOL000675	oleic acid	DZ15	Glucagon	#N/A
MOL000675	oleic acid	DZ15	Glutamyl aminopeptidase	ENPEP
MOL000675	oleic acid	DZ15	Mitochondrial uncoupling protein 2	UCP2
MOL000675	oleic acid	DZ15	Sterol O-acyltransferase 1	SOAT1
MOL000675	oleic acid	DZ15	Cholecystokinin	CCK
MOL000675	oleic acid	DZ15	Cbp/p300-interacting transactivator 1	CITED1
MOL000675	oleic acid	DZ15	BDNF/NT-3 growth factors receptor	NTRK2
MOL000675	oleic acid	DZ15	Pancreas/duodenum homeobox protein 1	PDX1
MOL000675	oleic acid	DZ15	Solute carrier family 2, facilitated glucose transporter member 2	SLC2A2
MOL000675	oleic acid	DZ15	Peptidyl-glycine alpha-amidating monooxygenase	PAM
MOL000675	oleic acid	DZ15	Acyl-CoA desaturase	SCD
MOL000675	oleic acid	DZ15	Mitochondrial uncoupling protein 3	UCP3
MOL000675	oleic acid	DZ15	Cholesteryl ester transfer protein	CETP
MOL000675	oleic acid	DZ15	Peptide YY	PYY
MOL000675	oleic acid	DZ15	Aspartyl aminopeptidase	DNPEP
MOL000675	oleic acid	DZ15	Cell-death-related nuclease 7	#N/A
MOL006986	Nornuciferine	DZ16	Prostaglandin G/H synthase 1	PTGS1
MOL006986	Nornuciferine	DZ16	Muscarinic acetylcholine receptor M3	CHRM3
MOL006986	Nornuciferine	DZ16	Muscarinic acetylcholine receptor M1	CHRM1
MOL006986	Nornuciferine	DZ16	Androgen receptor	AR
MOL006986	Nornuciferine	DZ16	Sodium channel protein type 5 subunit alpha	SCN5A
MOL006986	Nornuciferine	DZ16	Muscarinic acetylcholine receptor M5	CHRM5
MOL006986	Nornuciferine	DZ16	Prostaglandin G/H synthase 2	PTGS2
MOL006986	Nornuciferine	DZ16	Nitric-oxide synthase, endothelial	NOS3
MOL006986	Nornuciferine	DZ16	5-hydroxytryptamine receptor 3A	HTR3A
MOL006986	Nornuciferine	DZ16	Muscarinic acetylcholine receptor M4	CHRM4
MOL006986	Nornuciferine	DZ16	Retinoic acid receptor RXR-alpha	RXRA
MOL006986	Nornuciferine	DZ16	Delta-type opioid receptor	OPRD1
MOL006986	Nornuciferine	DZ16	Acetylcholinesterase	ACHE
MOL006986	Nornuciferine	DZ16	CGMP-inhibited 3',5'-cyclic phosphodiesterase A	PDE3A
MOL006986	Nornuciferine	DZ16	Alpha-1A adrenergic receptor	ADRA1A
MOL006986	Nornuciferine	DZ16	Alpha-1B adrenergic receptor	ADRA1B
MOL006986	Nornuciferine	DZ16	Sodium-dependent dopamine transporter	SLC6A3
MOL006986	Nornuciferine	DZ16	Beta-2 adrenergic receptor	ADRB2
MOL006986	Nornuciferine	DZ16	Alpha-1D adrenergic receptor	ADRA1D
MOL006986	Nornuciferine	DZ16	Sodium-dependent serotonin transporter	SLC6A4
MOL006986	Nornuciferine	DZ16	Gamma-aminobutyric acid receptor subunit alpha-1	GABRA1
MOL006986	Nornuciferine	DZ16	Phosphatidylinositol-4,5-bisphosphate 3-kinase catalytic subunit, gamma isoform	PIK3CG
MOL006986	Nornuciferine	DZ16	Mu-type opioid receptor	OPRM1
MOL006986	Nornuciferine	DZ16	Neuronal acetylcholine receptor protein, alpha-7 chain	CHRNA7
MOL007213	Nuciferin	DZ17	Prostaglandin G/H synthase 1	PTGS1
MOL007213	Nuciferin	DZ17	Muscarinic acetylcholine receptor M3	CHRM3
MOL007213	Nuciferin	DZ17	Muscarinic acetylcholine receptor M1	CHRM1
MOL007213	Nuciferin	DZ17	Androgen receptor	AR
MOL007213	Nuciferin	DZ17	Sodium channel protein type 5 subunit alpha	SCN5A
MOL007213	Nuciferin	DZ17	Muscarinic acetylcholine receptor M5	CHRM5
MOL007213	Nuciferin	DZ17	Prostaglandin G/H synthase 2	PTGS2
MOL007213	Nuciferin	DZ17	5-hydroxytryptamine receptor 3A	HTR3A
MOL007213	Nuciferin	DZ17	Muscarinic acetylcholine receptor M4	CHRM4
MOL007213	Nuciferin	DZ17	Retinoic acid receptor RXR-alpha	RXRA
MOL007213	Nuciferin	DZ17	Delta-type opioid receptor	OPRD1
MOL007213	Nuciferin	DZ17	Acetylcholinesterase	ACHE
MOL007213	Nuciferin	DZ17	5-hydroxytryptamine 2A receptor	HTR2A
MOL007213	Nuciferin	DZ17	Sodium-dependent noradrenaline transporter	SLC6A2
MOL007213	Nuciferin	DZ17	Alpha-1A adrenergic receptor	ADRA1A
MOL007213	Nuciferin	DZ17	5-hydroxytryptamine 2C receptor	HTR2C
MOL007213	Nuciferin	DZ17	Alpha-2B adrenergic receptor	ADRA2B
MOL007213	Nuciferin	DZ17	Alpha-1B adrenergic receptor	ADRA1B
MOL007213	Nuciferin	DZ17	Sodium-dependent dopamine transporter	SLC6A3
MOL007213	Nuciferin	DZ17	Beta-2 adrenergic receptor	ADRB2
MOL007213	Nuciferin	DZ17	Alpha-1D adrenergic receptor	ADRA1D
MOL007213	Nuciferin	DZ17	Neuronal acetylcholine receptor subunit alpha-2	CHRNA2
MOL007213	Nuciferin	DZ17	Sodium-dependent serotonin transporter	SLC6A4
MOL007213	Nuciferin	DZ17	D(2) dopamine receptor	DRD2
MOL007213	Nuciferin	DZ17	Mu-type opioid receptor	OPRM1
MOL007213	Nuciferin	DZ17	Gamma-aminobutyric acid receptor subunit alpha-1	GABRA1
MOL007213	Nuciferin	DZ17	Neuronal acetylcholine receptor protein, alpha-7 chain	CHRNA7
MOL000749	Linoleic	DZ18	Prostaglandin G/H synthase 1	PTGS1
MOL000749	Linoleic	DZ18	Prostaglandin G/H synthase 2	PTGS2
MOL000749	Linoleic	DZ18	Retinoic acid receptor RXR-alpha	RXRA
MOL000749	Linoleic	DZ18	Sodium-dependent noradrenaline transporter	SLC6A2
MOL000749	Linoleic	DZ18	Nuclear receptor coactivator 2	NCOA2
MOL000749	Linoleic	DZ18	Muscarinic acetylcholine receptor M1	CHRM1
MOL000749	Linoleic	DZ18	Beta-1 adrenergic receptor	ADRB1
MOL000749	Linoleic	DZ18	Alpha-2A adrenergic receptor	ADRA2A
MOL000749	Linoleic	DZ18	Muscarinic acetylcholine receptor M2	CHRM2
MOL000749	Linoleic	DZ18	Alpha-2B adrenergic receptor	ADRA2B
MOL000749	Linoleic	DZ18	Sodium-dependent dopamine transporter	SLC6A3
MOL000749	Linoleic	DZ18	Beta-2 adrenergic receptor	ADRB2
MOL000749	Linoleic	DZ18	Sodium-dependent serotonin transporter	SLC6A4
MOL000749	Linoleic	DZ18	Amine oxidase [flavin-containing] B	MAOB
MOL000787	Fumarine	DZ19	Prostaglandin G/H synthase 1	PTGS1
MOL000787	Fumarine	DZ19	Muscarinic acetylcholine receptor M3	CHRM3
MOL000787	Fumarine	DZ19	Potassium voltage-gated channel subfamily H member 2	KCNH2
MOL000787	Fumarine	DZ19	Muscarinic acetylcholine receptor M1	CHRM1
MOL000787	Fumarine	DZ19	Sodium channel protein type 5 subunit alpha	SCN5A
MOL000787	Fumarine	DZ19	Coagulation factor Xa	#N/A
MOL000787	Fumarine	DZ19	Muscarinic acetylcholine receptor M5	CHRM5
MOL000787	Fumarine	DZ19	Prostaglandin G/H synthase 2	PTGS2
MOL000787	Fumarine	DZ19	5-hydroxytryptamine receptor 3A	HTR3A
MOL000787	Fumarine	DZ19	Coagulation factor VII	F7
MOL000787	Fumarine	DZ19	Muscarinic acetylcholine receptor M4	CHRM4
MOL000787	Fumarine	DZ19	Delta-type opioid receptor	OPRD1
MOL000787	Fumarine	DZ19	5-hydroxytryptamine 2A receptor	HTR2A
MOL000787	Fumarine	DZ19	Alpha-1B adrenergic receptor	ADRA1B
MOL000787	Fumarine	DZ19	Beta-2 adrenergic receptor	ADRB2
MOL000787	Fumarine	DZ19	Alpha-1D adrenergic receptor	ADRA1D
MOL000787	Fumarine	DZ19	Mu-type opioid receptor	OPRM1
MOL000787	Fumarine	DZ19	Heat shock protein HSP 90	HSP83
MOL000787	Fumarine	DZ19	mRNA of PKA Catalytic Subunit C-alpha	#N/A
MOL000787	Fumarine	DZ19	Calmodulin	CALM
MOL000787	Fumarine	DZ19	Sodium-dependent serotonin transporter	SLC6A4
MOL000787	Fumarine	DZ19	Voltage-dependent L-type calcium channel subunit alpha-1S	CACNA1S
MOL000787	Fumarine	DZ19	CGMP-inhibited 3',5'-cyclic phosphodiesterase A	PDE3A
MOL000787	Fumarine	DZ19	Sodium-dependent dopamine transporter	SLC6A3
MOL000787	Fumarine	DZ19	Type IV phosphodiesterase	#N/A
MOL000787	Fumarine	DZ19	DNA topoisomerase II	TOP2B
MOL000787	Fumarine	DZ19	Dopamine D1 receptor	DRD1
MOL000787	Fumarine	DZ19	Vascular endothelial growth factor receptor 2	KDR
MOL002773	beta-carotene	DZ20	RAC-alpha serine/threonine-protein kinase	AKT1
MOL002773	beta-carotene	DZ20	Vascular endothelial growth factor A	VEGFA
MOL002773	beta-carotene	DZ20	Apoptosis regulator Bcl-2	BCL2
MOL002773	beta-carotene	DZ20	Caspase-9	CASP9
MOL002773	beta-carotene	DZ20	72 kDa type IV collagenase	MMP2
MOL002773	beta-carotene	DZ20	Transcription factor AP-1	#N/A
MOL002773	beta-carotene	DZ20	Caspase-3	CASP3
MOL002773	beta-carotene	DZ20	Prostaglandin G/H synthase 2	PTGS2
MOL002773	beta-carotene	DZ20	Caspase-8	CASP8
MOL002773	beta-carotene	DZ20	Interstitial collagenase	MMP1
MOL002773	beta-carotene	DZ20	Heme oxygenase 1	HMOX1
MOL002773	beta-carotene	DZ20	Cytochrome P450 3A4	CYP3A4
MOL002773	beta-carotene	DZ20	Cytochrome P450 2B1	LOC102915842
MOL002773	beta-carotene	DZ20	Cytochrome P450 1A2	CYP1A2
MOL002773	beta-carotene	DZ20	Serum albumin	#N/A
MOL002773	beta-carotene	DZ20	Caveolin-1	CAV1
MOL002773	beta-carotene	DZ20	Catenin beta-1	CTNNB1
MOL002773	beta-carotene	DZ20	Myc proto-oncogene protein	MYC
MOL002773	beta-carotene	DZ20	Caspase-7	CASP7
MOL002773	beta-carotene	DZ20	Tissue factor	F3
MOL002773	beta-carotene	DZ20	Gap junction alpha-1 protein	GJA1
MOL002773	beta-carotene	DZ20	Stromelysin-2	MMP10
MOL000096	(-)-catechin	DZ21	Prostaglandin G/H synthase 1	PTGS1
MOL000096	(-)-catechin	DZ21	Estrogen receptor	ESR1
MOL000096	(-)-catechin	DZ21	Prostaglandin G/H synthase 2	PTGS2
MOL000096	(-)-catechin	DZ21	Heat shock protein HSP 90	HSP83
MOL000096	(-)-catechin	DZ21	Beta-lactamase	#N/A
MOL000096	(-)-catechin	DZ21	mRNA of PKA Catalytic Subunit C-alpha	#N/A
MOL000096	(-)-catechin	DZ21	Nuclear receptor coactivator 2	NCOA2
MOL000096	(-)-catechin	DZ21	Calmodulin	CALM
MOL000096	(-)-catechin	DZ21	Fatty acid synthase	FASN
MOL000096	(-)-catechin	DZ21	Peroxisome proliferator-activated receptor gamma	PPARG
MOL000096	(-)-catechin	DZ21	Krueppel-like factor 7	KLF7
MOL000098	quercetin	DZ22	Prostaglandin G/H synthase 1	PTGS1
MOL000098	quercetin	DZ22	Androgen receptor	AR
MOL000098	quercetin	DZ22	Peroxisome proliferator activated receptor gamma	PPARG
MOL000098	quercetin	DZ22	Prostaglandin G/H synthase 2	PTGS2
MOL000098	quercetin	DZ22	Heat shock protein HSP 90	HSP83
MOL000098	quercetin	DZ22	Phosphatidylinositol-4,5-bisphosphate 3-kinase catalytic subunit, gamma isoform	PIK3CG
MOL000098	quercetin	DZ22	Nuclear receptor coactivator 2	NCOA2
MOL000098	quercetin	DZ22	Dipeptidyl peptidase IV	DPP4
MOL000098	quercetin	DZ22	Aldose reductase	AKR1B1
MOL000098	quercetin	DZ22	Trypsin-1	PRSS1
MOL000098	quercetin	DZ22	DNA topoisomerase II	TOP2B
MOL000098	quercetin	DZ22	Thrombin	#N/A
MOL000098	quercetin	DZ22	Potassium voltage-gated channel subfamily H member 2	KCNH2
MOL000098	quercetin	DZ22	Sodium channel protein type 5 subunit alpha	SCN5A
MOL000098	quercetin	DZ22	Coagulation factor Xa	#N/A
MOL000098	quercetin	DZ22	Beta-2 adrenergic receptor	ADRB2
MOL000098	quercetin	DZ22	Stromelysin-1	MMP3
MOL000098	quercetin	DZ22	mRNA of PKA Catalytic Subunit C-alpha	#N/A
MOL000098	quercetin	DZ22	Coagulation factor VII	F7
MOL000098	quercetin	DZ22	Nitric-oxide synthase, endothelial	NOS3
MOL000098	quercetin	DZ22	Retinoic acid receptor RXR-alpha	RXRA
MOL000098	quercetin	DZ22	Acetylcholinesterase	ACHE
MOL000098	quercetin	DZ22	Gamma-aminobutyric acid receptor subunit alpha-1	GABRA1
MOL000098	quercetin	DZ22	Amine oxidase [flavin-containing] B	MAOB
MOL000098	quercetin	DZ22	Transcription factor p65	RELA
MOL000098	quercetin	DZ22	Epidermal growth factor receptor	EGFR
MOL000098	quercetin	DZ22	RAC-alpha serine/threonine-protein kinase	AKT1
MOL000098	quercetin	DZ22	Vascular endothelial growth factor A	VEGFA
MOL000098	quercetin	DZ22	G1/S-specific cyclin-D1	CCND1
MOL000098	quercetin	DZ22	Apoptosis regulator Bcl-2	BCL2
MOL000098	quercetin	DZ22	Bcl-2-like protein 1	BCL2L1
MOL000098	quercetin	DZ22	Proto-oncogene c-Fos	FOS
MOL000098	quercetin	DZ22	Cyclin-dependent kinase inhibitor 1	CDKN1A
MOL000098	quercetin	DZ22	Eukaryotic translation initiation factor 6	EIF6
MOL000098	quercetin	DZ22	Apoptosis regulator BAX	BAX
MOL000098	quercetin	DZ22	Caspase-9	CASP9
MOL000098	quercetin	DZ22	Urokinase-type plasminogen activator	PLAU
MOL000098	quercetin	DZ22	72 kDa type IV collagenase	MMP2
MOL000098	quercetin	DZ22	Matrix metalloproteinase-9	MMP9
MOL000098	quercetin	DZ22	Mitogen-activated protein kinase 1	MAPK1
MOL000098	quercetin	DZ22	Interleukin-10	IL10
MOL000098	quercetin	DZ22	Pro-epidermal growth factor	EGF
MOL000098	quercetin	DZ22	Retinoblastoma-associated protein	RB1
MOL000098	quercetin	DZ22	Tumor necrosis factor	TNF
MOL000098	quercetin	DZ22	Transcription factor AP-1	#N/A
MOL000098	quercetin	DZ22	Interleukin-6	IL6
MOL000098	quercetin	DZ22	Cyclin-dependent kinase inhibitor 2A, isoforms 1/2/3	CDKN2A
MOL000098	quercetin	DZ22	Activator of 90 kDa heat shock protein ATPase homolog 1	AHSA1
MOL000098	quercetin	DZ22	Caspase-3	CASP3
MOL000098	quercetin	DZ22	Cellular tumor antigen p53	TP53
MOL000098	quercetin	DZ22	ETS domain-containing protein Elk-1	ELK1
MOL000098	quercetin	DZ22	NF-kappa-B inhibitor alpha	NFKBIA
MOL000098	quercetin	DZ22	NADPH--cytochrome P450 reductase	POR
MOL000098	quercetin	DZ22	Ornithine decarboxylase	ODC1
MOL000098	quercetin	DZ22	Xanthine dehydrogenase/oxidase	XDH
MOL000098	quercetin	DZ22	Caspase-8	CASP8
MOL000098	quercetin	DZ22	DNA topoisomerase 1	TOP1
MOL000098	quercetin	DZ22	RAF proto-oncogene serine/threonine-protein kinase	RAF1
MOL000098	quercetin	DZ22	Superoxide dismutase [Cu-Zn]	SOD1
MOL000098	quercetin	DZ22	Protein kinase C alpha type	PRKCA
MOL000098	quercetin	DZ22	Interstitial collagenase	MMP1
MOL000098	quercetin	DZ22	Hypoxia-inducible factor 1-alpha	HIF1A
MOL000098	quercetin	DZ22	Signal transducer and activator of transcription 1-alpha/beta	STAT1
MOL000098	quercetin	DZ22	Protein CBFA2T1	RUNX1T1
MOL000098	quercetin	DZ22	Probable E3 ubiquitin-protein ligase HERC5	#N/A
MOL000098	quercetin	DZ22	Cell division control protein 2 homolog	CDK1
MOL000098	quercetin	DZ22	78 kDa glucose-regulated protein	HSPA5
MOL000098	quercetin	DZ22	Receptor tyrosine-protein kinase erbB-2	ERBB2
MOL000098	quercetin	DZ22	Peroxisome proliferator-activated receptor gamma	PPARG
MOL000098	quercetin	DZ22	Acetyl-CoA carboxylase 1	ACACA
MOL000098	quercetin	DZ22	Heme oxygenase 1	HMOX1
MOL000098	quercetin	DZ22	Cytochrome P450 3A4	CYP3A4
MOL000098	quercetin	DZ22	Cytochrome P450 1A2	CYP1A2
MOL000098	quercetin	DZ22	Caveolin-1	CAV1
MOL000098	quercetin	DZ22	Myc proto-oncogene protein	MYC
MOL000098	quercetin	DZ22	Tissue factor	F3
MOL000098	quercetin	DZ22	Gap junction alpha-1 protein	GJA1
MOL000098	quercetin	DZ22	Cytochrome P450 1A1	CYP1A1
MOL000098	quercetin	DZ22	Intercellular adhesion molecule 1	ICAM1
MOL000098	quercetin	DZ22	Interleukin-1 beta	IL1B
MOL000098	quercetin	DZ22	C-C motif chemokine 2	CCL2
MOL000098	quercetin	DZ22	E-selectin	SELE
MOL000098	quercetin	DZ22	Vascular cell adhesion protein 1	VCAM1
MOL000098	quercetin	DZ22	Prostaglandin E2 receptor EP3 subtype	PTGER3
MOL000098	quercetin	DZ22	Interleukin-8	CXCL8
MOL000098	quercetin	DZ22	Protein kinase C beta type	PRKCB
MOL000098	quercetin	DZ22	Baculoviral IAP repeat-containing protein 5	BIRC5
MOL000098	quercetin	DZ22	Dual oxidase 2	DUOX2
MOL000098	quercetin	DZ22	Nitric oxide synthase, endothelial	NOS3
MOL000098	quercetin	DZ22	Heat shock protein beta-1	HSPB1
MOL000098	quercetin	DZ22	Transforming growth factor beta-1	TGFB1
MOL000098	quercetin	DZ22	Estrogen sulfotransferase	SULT1E1
MOL000098	quercetin	DZ22	Maltase-glucoamylase, intestinal	#N/A
MOL000098	quercetin	DZ22	Interleukin-2	IL2
MOL000098	quercetin	DZ22	Nuclear receptor subfamily 1 group I member 2	NR1I2
MOL000098	quercetin	DZ22	Cytochrome P450 1B1	CYP1B1
MOL000098	quercetin	DZ22	G2/mitotic-specific cyclin-B1	CCNB1
MOL000098	quercetin	DZ22	Tissue-type plasminogen activator	PLAT
MOL000098	quercetin	DZ22	Thrombomodulin	THBD
MOL000098	quercetin	DZ22	Plasminogen activator inhibitor 1	SERPINE1
MOL000098	quercetin	DZ22	Collagen alpha-1(I) chain	COL1A1
MOL000098	quercetin	DZ22	Interferon gamma	IFNG
MOL000098	quercetin	DZ22	Arachidonate 5-lipoxygenase	ALOX5
MOL000098	quercetin	DZ22	Phosphatidylinositol-3,4,5-trisphosphate 3-phosphatase and dual-specificity protein phosphatase PTEN	PTEN
MOL000098	quercetin	DZ22	Interleukin-1 alpha	IL1A
MOL000098	quercetin	DZ22	Myeloperoxidase	MPO
MOL000098	quercetin	DZ22	DNA topoisomerase 2-alpha	TOP2A
MOL000098	quercetin	DZ22	Neutrophil cytosol factor 1	NCF1
MOL000098	quercetin	DZ22	ATP-binding cassette sub-family G member 2	ABCG2
MOL000098	quercetin	DZ22	Hyaluronan synthase 2	HAS2
MOL000098	quercetin	DZ22	Glutathione S-transferase P	GSTP1
MOL000098	quercetin	DZ22	Nuclear factor erythroid 2-related factor 2	NFE2L2
MOL000098	quercetin	DZ22	NAD(P)H dehydrogenase [quinone] 1	NQO1
MOL000098	quercetin	DZ22	Poly [ADP-ribose] polymerase 1	PARP1
MOL000098	quercetin	DZ22	Aryl hydrocarbon receptor	AHR
MOL000098	quercetin	DZ22	26S proteasome non-ATPase regulatory subunit 3	PSMD3
MOL000098	quercetin	DZ22	Solute carrier family 2, facilitated glucose transporter member 4	SLC2A4
MOL000098	quercetin	DZ22	Collagen alpha-1(III) chain	COL3A1
MOL000098	quercetin	DZ22	DNA gyrase subunit B	GYRB
MOL000098	quercetin	DZ22	C-X-C motif chemokine 11	CXCL11
MOL000098	quercetin	DZ22	C-X-C motif chemokine 2	CXCL2
MOL000098	quercetin	DZ22	DDB1- and CUL4-associated factor 5	DCAF5
MOL000098	quercetin	DZ22	Nuclear receptor subfamily 1 group I member 3	NR1I3
MOL000098	quercetin	DZ22	Serine/threonine-protein kinase Chk2	CHEK2
MOL000098	quercetin	DZ22	Insulin receptor	INSR
MOL000098	quercetin	DZ22	Claudin-4	CLDN4
MOL000098	quercetin	DZ22	Peroxisome proliferator-activated receptor alpha	PPARA
MOL000098	quercetin	DZ22	Peroxisome proliferator-activated receptor delta	PPARD
MOL000098	quercetin	DZ22	Heat shock factor protein 1	HSF1
MOL000098	quercetin	DZ22	C-reactive protein	CRP
MOL000098	quercetin	DZ22	C-X-C motif chemokine 10	CXCL10
MOL000098	quercetin	DZ22	Inhibitor of nuclear factor kappa-B kinase subunit alpha	CHUK
MOL000098	quercetin	DZ22	Osteopontin	SPP1
MOL000098	quercetin	DZ22	Runt-related transcription factor 2	RUNX2
MOL000098	quercetin	DZ22	Ras association domain-containing protein 1	RASSF1
MOL000098	quercetin	DZ22	Transcription factor E2F1	E2F1
MOL000098	quercetin	DZ22	Transcription factor E2F2	E2F2
MOL000098	quercetin	DZ22	Prostatic acid phosphatase	ACP3
MOL000098	quercetin	DZ22	Cathepsin D	CTSD
MOL000098	quercetin	DZ22	Insulin-like growth factor-binding protein 3	IGFBP3
MOL000098	quercetin	DZ22	Insulin-like growth factor II	IGF2
MOL000098	quercetin	DZ22	CD40 ligand	CD40LG
MOL000098	quercetin	DZ22	Interferon regulatory factor 1	IRF1
MOL000098	quercetin	DZ22	Receptor tyrosine-protein kinase erbB-3	ERBB3
MOL000098	quercetin	DZ22	Serum paraoxonase/arylesterase 1	PON1
MOL000098	quercetin	DZ22	Type I iodothyronine deiodinase	DIO1
MOL000098	quercetin	DZ22	Procollagen C-endopeptidase enhancer 1	PCOLCE
MOL000098	quercetin	DZ22	Puromycin-sensitive aminopeptidase	NPEPPS
MOL000098	quercetin	DZ22	Hexokinase-2	HK2
MOL000098	quercetin	DZ22	Homeobox protein Nkx-3.1	NKX3-1
MOL000098	quercetin	DZ22	Ras GTPase-activating protein 1	RASA1
MOL000098	quercetin	DZ22	Peroxidase C1A	PRXC1A
MOL000098	quercetin	DZ22	Glutathione S-transferase Mu 1	GSTM1
MOL000098	quercetin	DZ22	Glutathione S-transferase Mu 2	GSTM2
MOL000357	Sitogluside	DZ23	Progesterone receptor	PGR
MOL000357	Sitogluside	DZ23	Prostaglandin G/H synthase 1	PTGS1
MOL000357	Sitogluside	DZ23	Muscarinic acetylcholine receptor M3	CHRM3
MOL000357	Sitogluside	DZ23	Potassium voltage-gated channel subfamily H member 2	KCNH2
MOL000357	Sitogluside	DZ23	Muscarinic acetylcholine receptor M1	CHRM1
MOL000357	Sitogluside	DZ23	Sodium channel protein type 5 subunit alpha	SCN5A
MOL000357	Sitogluside	DZ23	Coagulation factor Xa	#N/A
MOL000357	Sitogluside	DZ23	Prostaglandin G/H synthase 2	PTGS2
MOL000357	Sitogluside	DZ23	5-hydroxytryptamine receptor 3A	HTR3A
MOL000357	Sitogluside	DZ23	Retinoic acid receptor RXR-alpha	RXRA
MOL000357	Sitogluside	DZ23	CGMP-inhibited 3',5'-cyclic phosphodiesterase A	PDE3A
MOL000357	Sitogluside	DZ23	Alpha-1B adrenergic receptor	ADRA1B
MOL000357	Sitogluside	DZ23	Beta-2 adrenergic receptor	ADRB2
MOL000357	Sitogluside	DZ23	Alpha-1D adrenergic receptor	ADRA1D
MOL000357	Sitogluside	DZ23	Heat shock protein HSP 90	HSP83
MOL000357	Sitogluside	DZ23	Nuclear receptor coactivator 2	NCOA2
MOL000357	Sitogluside	DZ23	Calmodulin	CALM

## Sheet: GX
MOLID	ingredients	Abbreviated ID	Target gene	Target gene
MOL000131	EIC	GX1	Prostaglandin G/H synthase 1	PTGS1
MOL000131	EIC	GX1	Prostaglandin G/H synthase 2	PTGS2
MOL000131	EIC	GX1	Retinoic acid receptor RXR-alpha	RXRA
MOL000131	EIC	GX1	Nuclear receptor coactivator 2	NCOA2
MOL000131	EIC	GX1	Sodium-dependent noradrenaline transporter	SLC6A2
MOL000131	EIC	GX1	Ig gamma-1 chain C region	IGHG1
MOL000131	EIC	GX1	Gamma-aminobutyric-acid receptor alpha-2 subunit	GABRA2
MOL000131	EIC	GX1	Gamma-aminobutyric acid receptor subunit alpha-1	GABRA1
MOL000131	EIC	GX1	Transient receptor potential cation channel subfamily V member 1	TRPV1
MOL000131	EIC	GX1	Muscarinic acetylcholine receptor M1	CHRM1
MOL000131	EIC	GX1	Muscarinic acetylcholine receptor M2	CHRM2
MOL000131	EIC	GX1	Gamma-aminobutyric-acid receptor subunit alpha-6	GABRA6
MOL001600	copaene	GX2	Prostaglandin G/H synthase 2	PTGS2
MOL001600	copaene	GX2	Gamma-aminobutyric acid receptor subunit alpha-1	GABRA1
MOL001600	copaene	GX2	Muscarinic acetylcholine receptor M3	CHRM3
MOL001600	copaene	GX2	Muscarinic acetylcholine receptor M1	CHRM1
MOL001600	copaene	GX2	Gamma-aminobutyric-acid receptor alpha-2 subunit	GABRA2
MOL001600	copaene	GX2	Retinoic acid receptor RXR-alpha	RXRA
MOL001600	copaene	GX2	Muscarinic acetylcholine receptor M2	CHRM2
MOL001600	copaene	GX2	Alpha-1B adrenergic receptor	ADRA1B
MOL001600	copaene	GX2	Gamma-aminobutyric-acid receptor subunit alpha-6	GABRA6
MOL000208	()-Aromadendrene	GX3	Muscarinic acetylcholine receptor M3	CHRM3
MOL000208	()-Aromadendrene	GX3	Muscarinic acetylcholine receptor M2	CHRM2
MOL000208	()-Aromadendrene	GX3	Muscarinic acetylcholine receptor M1	CHRM1
MOL000208	()-Aromadendrene	GX3	Alcohol dehydrogenase 1C	ADH1C
MOL002502	copaene	GX4	Prostaglandin G/H synthase 1	PTGS1
MOL002502	copaene	GX4	Muscarinic acetylcholine receptor M3	CHRM3
MOL002502	copaene	GX4	Muscarinic acetylcholine receptor M1	CHRM1
MOL002502	copaene	GX4	Prostaglandin G/H synthase 2	PTGS2
MOL002502	copaene	GX4	Muscarinic acetylcholine receptor M2	CHRM2
MOL002502	copaene	GX4	Gamma-aminobutyric acid receptor subunit alpha-1	GABRA1
MOL002502	copaene	GX4	Gamma-aminobutyric-acid receptor subunit alpha-6	GABRA6
MOL000266	beta-Cubebene	GX5	Muscarinic acetylcholine receptor M1	CHRM1
MOL000266	beta-Cubebene	GX5	Muscarinic acetylcholine receptor M2	CHRM2
MOL000266	beta-Cubebene	GX5	Gamma-aminobutyric acid receptor subunit alpha-1	GABRA1
MOL000266	beta-Cubebene	GX5	Prostaglandin G/H synthase 2	PTGS2
MOL000266	beta-Cubebene	GX5	Neuronal acetylcholine receptor subunit alpha-2	CHRNA2
MOL000266	beta-Cubebene	GX5	Sodium-dependent noradrenaline transporter	SLC6A2
MOL002697	junipene	GX6	Muscarinic acetylcholine receptor M3	CHRM3
MOL002697	junipene	GX6	Muscarinic acetylcholine receptor M2	CHRM2
MOL002697	junipene	GX6	Gamma-aminobutyric acid receptor subunit alpha-1	GABRA1
MOL002697	junipene	GX6	Gamma-aminobutyric-acid receptor alpha-2 subunit	GABRA2
MOL002697	junipene	GX6	Alpha-1B adrenergic receptor	ADRA1B
MOL002697	junipene	GX6	Neuronal acetylcholine receptor subunit alpha-2	CHRNA2
MOL003522	()-Sativene	GX7	Muscarinic acetylcholine receptor M3	CHRM3
MOL003522	()-Sativene	GX7	Muscarinic acetylcholine receptor M1	CHRM1
MOL003522	()-Sativene	GX7	Prostaglandin G/H synthase 2	PTGS2
MOL003522	()-Sativene	GX7	Gamma-aminobutyric-acid receptor alpha-2 subunit	GABRA2
MOL003522	()-Sativene	GX7	Gamma-aminobutyric-acid receptor alpha-3 subunit	GABRA3
MOL003522	()-Sativene	GX7	Muscarinic acetylcholine receptor M2	CHRM2
MOL003522	()-Sativene	GX7	Alpha-1B adrenergic receptor	ADRA1B
MOL003522	()-Sativene	GX7	Neuronal acetylcholine receptor subunit alpha-2	CHRNA2
MOL003522	()-Sativene	GX7	Gamma-aminobutyric acid receptor subunit alpha-1	GABRA1
MOL003522	()-Sativene	GX7	Neuronal acetylcholine receptor protein, alpha-7 chain	CHRNA7
MOL003522	()-Sativene	GX7	Nuclear receptor coactivator 2	NCOA2
MOL003538	()-Ledene	GX8	Nuclear receptor coactivator 2	NCOA2
MOL003538	()-Ledene	GX8	Muscarinic acetylcholine receptor M3	CHRM3
MOL003538	()-Ledene	GX8	Muscarinic acetylcholine receptor M1	CHRM1
MOL002003	(-)-Caryophyllene oxide	GX9	Muscarinic acetylcholine receptor M3	CHRM3
MOL002003	(-)-Caryophyllene oxide	GX9	Muscarinic acetylcholine receptor M1	CHRM1
MOL002003	(-)-Caryophyllene oxide	GX9	Prostaglandin G/H synthase 2	PTGS2
MOL002003	(-)-Caryophyllene oxide	GX9	Acetylcholinesterase	ACHE
MOL002003	(-)-Caryophyllene oxide	GX9	Muscarinic acetylcholine receptor M2	CHRM2
MOL002003	(-)-Caryophyllene oxide	GX9	Alpha-1B adrenergic receptor	ADRA1B
MOL002003	(-)-Caryophyllene oxide	GX9	Gamma-aminobutyric acid receptor subunit alpha-1	GABRA1
MOL002003	(-)-Caryophyllene oxide	GX9	Dipeptidyl peptidase IV	DPP4
MOL002003	(-)-Caryophyllene oxide	GX9	Gamma-aminobutyric-acid receptor subunit alpha-6	GABRA6
MOL000057	DIBP	GX10	Muscarinic acetylcholine receptor M3	CHRM3
MOL000057	DIBP	GX10	Muscarinic acetylcholine receptor M1	CHRM1
MOL000057	DIBP	GX10	Sodium-dependent noradrenaline transporter	SLC6A2
MOL000057	DIBP	GX10	Sodium-dependent dopamine transporter	SLC6A3
MOL000057	DIBP	GX10	Beta-2 adrenergic receptor	ADRB2
MOL000057	DIBP	GX10	Sodium-dependent serotonin transporter	SLC6A4
MOL000057	DIBP	GX10	Gamma-aminobutyric acid receptor subunit alpha-1	GABRA1
MOL000057	DIBP	GX10	Muscarinic acetylcholine receptor M2	CHRM2
MOL000057	DIBP	GX10	5-hydroxytryptamine 2A receptor	HTR2A
MOL000057	DIBP	GX10	Progesterone receptor	PGR
MOL000057	DIBP	GX10	Mineralocorticoid receptor	NR3C2
MOL000057	DIBP	GX10	Glucocorticoid receptor	NR3C1
MOL000057	DIBP	GX10	Nuclear receptor coactivator 2	NCOA2
MOL000057	DIBP	GX10	Retinoic acid receptor RXR-alpha	RXRA
MOL000612	(-)-alpha-cedrene	GX11	Muscarinic acetylcholine receptor M3	CHRM3
MOL000612	(-)-alpha-cedrene	GX11	Prostaglandin G/H synthase 2	PTGS2
MOL000612	(-)-alpha-cedrene	GX11	Gamma-aminobutyric-acid receptor alpha-2 subunit	GABRA2
MOL000612	(-)-alpha-cedrene	GX11	Retinoic acid receptor RXR-alpha	RXRA
MOL000612	(-)-alpha-cedrene	GX11	Gamma-aminobutyric acid receptor subunit alpha-1	GABRA1
MOL000612	(-)-alpha-cedrene	GX11	Nuclear receptor coactivator 2	NCOA2
MOL000612	(-)-alpha-cedrene	GX11	Muscarinic acetylcholine receptor M1	CHRM1
MOL000612	(-)-alpha-cedrene	GX11	Alcohol dehydrogenase 1B	ADH1B
MOL000612	(-)-alpha-cedrene	GX11	Alcohol dehydrogenase 1C	ADH1C
MOL000675	oleic acid	GX12	Prostaglandin G/H synthase 1	PTGS1
MOL000675	oleic acid	GX12	Nuclear receptor coactivator 2	NCOA2
MOL000675	oleic acid	GX12	Prostaglandin G/H synthase 2	PTGS2
MOL000675	oleic acid	GX12	Alcohol dehydrogenase 1B	ADH1B
MOL000675	oleic acid	GX12	Alcohol dehydrogenase 1C	ADH1C
MOL000675	oleic acid	GX12	Alcohol dehydrogenase 1A	ADH1A
MOL000675	oleic acid	GX12	Trypsin-3	PRSS3
MOL000675	oleic acid	GX12	Retinoic acid receptor RXR-alpha	RXRA
MOL000675	oleic acid	GX12	Urokinase-type plasminogen activator	PLAU
MOL000675	oleic acid	GX12	Superoxide dismutase [Cu-Zn]	SOD1
MOL000675	oleic acid	GX12	Catalase	CAT
MOL000675	oleic acid	GX12	Telomerase protein component 1	TEP1
MOL000675	oleic acid	GX12	Endothelin-1	EDN1
MOL000675	oleic acid	GX12	Receptor tyrosine-protein kinase erbB-2	ERBB2
MOL000675	oleic acid	GX12	Peroxisome proliferator-activated receptor gamma	PPARG
MOL000675	oleic acid	GX12	Lipoprotein lipase	LPL
MOL000675	oleic acid	GX12	Neuromodulin	GAP43
MOL000675	oleic acid	GX12	Plasminogen activator inhibitor 1	SERPINE1
MOL000675	oleic acid	GX12	Brain-derived neurotrophic factor	BDNF
MOL000675	oleic acid	GX12	3-hydroxy-3-methylglutaryl-coenzyme A reductase	HMGCR
MOL000675	oleic acid	GX12	Myeloperoxidase	MPO
MOL000675	oleic acid	GX12	Peroxisome proliferator-activated receptor alpha	PPARA
MOL000675	oleic acid	GX12	Peroxisome proliferator-activated receptor delta	PPARD
MOL000675	oleic acid	GX12	C-reactive protein	CRP
MOL000675	oleic acid	GX12	Serum paraoxonase/arylesterase 1	PON1
MOL000675	oleic acid	GX12	Insulin	INS
MOL000675	oleic acid	GX12	Plasminogen	PLG
MOL000675	oleic acid	GX12	Fatty acid-binding protein, liver	FABP1
MOL000675	oleic acid	GX12	Retinol-binding protein 2	RBP2
MOL000675	oleic acid	GX12	Glutamyl aminopeptidase	ENPEP
MOL000675	oleic acid	GX12	Mitochondrial uncoupling protein 2	UCP2
MOL000675	oleic acid	GX12	Sterol O-acyltransferase 1	SOAT1
MOL000675	oleic acid	GX12	Cholecystokinin	CCK
MOL000675	oleic acid	GX12	Cbp/p300-interacting transactivator 1	CITED1
MOL000675	oleic acid	GX12	BDNF/NT-3 growth factors receptor	NTRK2
MOL000675	oleic acid	GX12	Pancreas/duodenum homeobox protein 1	PDX1
MOL000675	oleic acid	GX12	Solute carrier family 2, facilitated glucose transporter member 2	SLC2A2
MOL000675	oleic acid	GX12	Peptidyl-glycine alpha-amidating monooxygenase	PAM
MOL000675	oleic acid	GX12	Acyl-CoA desaturase	SCD
MOL000675	oleic acid	GX12	Mitochondrial uncoupling protein 3	UCP3
MOL000675	oleic acid	GX12	Cholesteryl ester transfer protein	CETP
MOL000675	oleic acid	GX12	Peptide YY	PYY
MOL000675	oleic acid	GX12	Aspartyl aminopeptidase	DNPEP

## Sheet: NWWZ
MOLID	ingredients	Abbreviated ID	Target gene	Target gene
MOL009198	(+)-Anwulignan	NWWZ1	Prostaglandin G/H synthase 1	PTGS1
MOL009198	(+)-Anwulignan	NWWZ1	Muscarinic acetylcholine receptor M3	CHRM3
MOL009198	(+)-Anwulignan	NWWZ1	Potassium voltage-gated channel subfamily H member 2	KCNH2
MOL009198	(+)-Anwulignan	NWWZ1	Muscarinic acetylcholine receptor M1	CHRM1
MOL009198	(+)-Anwulignan	NWWZ1	Estrogen receptor	ESR1
MOL009198	(+)-Anwulignan	NWWZ1	Beta-1 adrenergic receptor	ADRB1
MOL009198	(+)-Anwulignan	NWWZ1	Sodium channel protein type 5 subunit alpha	SCN5A
MOL009198	(+)-Anwulignan	NWWZ1	Muscarinic acetylcholine receptor M5	CHRM5
MOL009198	(+)-Anwulignan	NWWZ1	Prostaglandin G/H synthase 2	PTGS2
MOL009198	(+)-Anwulignan	NWWZ1	Alpha-2C adrenergic receptor	ADRA2C
MOL009198	(+)-Anwulignan	NWWZ1	Retinoic acid receptor RXR-alpha	RXRA
MOL009198	(+)-Anwulignan	NWWZ1	Delta-type opioid receptor	OPRD1
MOL009198	(+)-Anwulignan	NWWZ1	Alpha-1B adrenergic receptor	ADRA1B
MOL009198	(+)-Anwulignan	NWWZ1	Sodium-dependent dopamine transporter	SLC6A3
MOL009198	(+)-Anwulignan	NWWZ1	Beta-2 adrenergic receptor	ADRB2
MOL009198	(+)-Anwulignan	NWWZ1	Prostaglandin G/H synthase 1	PTGS1
MOL009198	(+)-Anwulignan	NWWZ1	Muscarinic acetylcholine receptor M3	CHRM3
MOL009198	(+)-Anwulignan	NWWZ1	Potassium voltage-gated channel subfamily H member 2	KCNH2
MOL009198	(+)-Anwulignan	NWWZ1	Muscarinic acetylcholine receptor M1	CHRM1
MOL009198	(+)-Anwulignan	NWWZ1	Estrogen receptor	ESR1
MOL009198	(+)-Anwulignan	NWWZ1	Beta-1 adrenergic receptor	ADRB1
MOL009198	(+)-Anwulignan	NWWZ1	Sodium channel protein type 5 subunit alpha	SCN5A
MOL009198	(+)-Anwulignan	NWWZ1	Muscarinic acetylcholine receptor M5	CHRM5
MOL009198	(+)-Anwulignan	NWWZ1	Prostaglandin G/H synthase 2	PTGS2
MOL009198	(+)-Anwulignan	NWWZ1	Alpha-2C adrenergic receptor	ADRA2C
MOL009198	(+)-Anwulignan	NWWZ1	Retinoic acid receptor RXR-alpha	RXRA
MOL009198	(+)-Anwulignan	NWWZ1	Delta-type opioid receptor	OPRD1
MOL009198	(+)-Anwulignan	NWWZ1	Alpha-1B adrenergic receptor	ADRA1B
MOL009198	(+)-Anwulignan	NWWZ1	Sodium-dependent dopamine transporter	SLC6A3
MOL009198	(+)-Anwulignan	NWWZ1	Beta-2 adrenergic receptor	ADRB2
MOL009207	heteroclitin G	NWWZ2	Prostaglandin G/H synthase 2	PTGS2
MOL009207	heteroclitin G	NWWZ2	DNA topoisomerase II	TOP2A
MOL009207	heteroclitin G	NWWZ2	Nuclear receptor coactivator 2	NCOA2
MOL009213	kadsulignan B	NWWZ3	Estrogen receptor	ESR1
MOL009213	kadsulignan B	NWWZ3	Androgen receptor	AR
MOL009215	Kadsurin	NWWZ4	Androgen receptor	AR
MOL009215	Kadsurin	NWWZ4	CGMP-specific 3',5'-cyclic phosphodiesterase	PDE5A
MOL009215	Kadsurin	NWWZ4	Prostaglandin G/H synthase 2	PTGS2
MOL009215	Kadsurin	NWWZ4	DNA topoisomerase II	TOP2A
MOL009215	Kadsurin	NWWZ4	Trypsin-1	PRSS1
MOL009215	Kadsurin	NWWZ4	Nuclear receptor coactivator 2	NCOA2
MOL009215	Kadsurin	NWWZ4	Calcium-activated potassium channel subunit alpha 1	KCNMA1
MOL009216	kadsutherin	NWWZ5	Androgen receptor	AR
MOL009216	kadsutherin	NWWZ5	Prostaglandin G/H synthase 2	PTGS2
MOL009216	kadsutherin	NWWZ5	Acetylcholinesterase	ACHE
MOL009216	kadsutherin	NWWZ5	DNA topoisomerase II	TOP2A
MOL009216	kadsutherin	NWWZ5	Trypsin-1	PRSS1
MOL009216	kadsutherin	NWWZ5	Nuclear receptor coactivator 2	NCOA2
MOL009216	kadsutherin	NWWZ5	Calcium-activated potassium channel subunit alpha 1	KCNMA1
MOL009219	neokadsuranic acid C	NWWZ6	Glucocorticoid receptor	NR3C1
MOL009220	neokadsuranin	NWWZ7	Androgen receptor	AR
MOL009220	neokadsuranin	NWWZ7	Prostaglandin G/H synthase 2	PTGS2
MOL009228	schisantherin M	NWWZ8	DNA topoisomerase II	TOP2A
MOL009235	angusifolin B	NWWZ9	DNA topoisomerase II	TOP2A

## Sheet: MD
麦冬的靶点
TOP2A
TOP2B
COMTD1
FBP1
IGF1R
PLA2G1B
PRKAB1
PRKAB2
LCK
EPHB2
COX6C
LSS
CREB1
TTHA0667
DTYMK
RRM2B
HCN2
ACSS1
ACSS2
SHBG
TK
GRIN3A
GRIN3B
HSP90B1
HCRT
BAG1
IL1B
PB1
L
ABCB11
RORA
DAPK1
VDR
MIF
PNP
SOAT1
SOAT2
DPH5
AMY1A
SETD7
GSS
CDK15
ENPP1
ACTA1
COX6B1
ACVR1B
PCMT1
LIP3
RPL11
RPL15
TTHA1435
RPL19
SLC25A4
RPL3
RPL8
HSD11B1
HSD11B2
NPPB
ITPR1
MT-CO1
MT-CO2
CLEC4E
SULT2B1
MT-CO3
ADH1B
NAGA
ADH1C
GNMT
SERPINA1
SLCO1B3
LSM6
GSK3B
ABCA1
PRMT1
RNASE1
PRMT3
AKT1
PYGL
HNMT
RPL13A
PIK3R1
EEF2
PAPSS1
PRKAR1A
KIF1A
YWHAE
NCOA1
NCOA2
NFKB1
NFKB2
HSPA8
TM0588
ADCY1
AHCY
GABRA1
PLA2G2E
GABRA2
GABRA3
GABRA4
LPL
GABRA5
GABRA6
COX7B
COX7C
RPL26L1
PPP5C
CFTR
RSL24D1
ACSL1
AR
GAPDH
RXRA
BALF5
PNMT
PGR
AMY2A
AMY2B
ANG
DCK
ESR1
ESR2
ABO
TLR7
PIM1
RPL23
TUBA4A
PRLR
RAD51
AKR1C1
AKR1C2
ASNS
AKR1C3
TNF
UCK2
CES1
CBR1
ITPKA
PFKFB4
AMHR2
APAF1
TRDMT1
ABCB1
COX7A1
HSD3B1
MTTP
RPL10L
PRKAR2B
ATP1A1
KIF2C
ATP1A2
ATP1A3
PIK3CA
IGLV2-8
FABP6
IL6
PIK3CG
CCT3
PAPS
GABRB1
GABRB2
CCL8
GABRB3
COX8A
FECH
PDE4B
PDE4D
ANXA1
ACVR1
CASP3
EFTUD1
SRPK2
ARAF
RRM1
RRM2
GSG2
AFG3L2
AK1
AK2
AK8
ASS1
PLK1
GAMT
TUBB
IGHG2
AURKB
POLB
RPL37
POLE
NR3C1
NR3C2
PREP
AKR1D1
HSD17B1
NME1
GABRD
GABRE
HK1
GSTP1
GABRP
GABRQ
NAE1
ADORA1
ADORA3
CSNK2B
TRPA1
ABCG1
TRPM7
STM4066
ABCC1
TRPM8
ABCC2
ABCC4
GALK1
ABCC6
COX4I1
ABCC8
ABCC9
DNMT1
KRTAP5-2
NR1H4
MAPK3
MTAP
ADORA2A
ADORA2B
ASNA1
NT5C2
PAEP
GABRG1
GABRG2
GABRG3
PRKAA1
COX5A
COX5B
TGFBR2
EPHA2
SIGMAR1
HINT1
MAFF_RS13750
FHIT
GLRA3
ARF1
TNK2
PPARA
PPARD
RPL23A
PPP1CC
MAPK10
MAPK12
GRIN2A
GRIN2B
GRIN2C
GRIN2D
HPGDS
ISYNA1
ESRRG
VCP
GRIN1
ACVRL1
ADA
DAM
ALK
ADK
AHR
CSNK1G2
COX6A2
TFF2
VEGFA
POLE2
POLA1
POLE3
POLE4
IMPDH1
IMPDH2
SULT2A1
SIRT3
SIRT5
RARG
KYNU
ADRBK1
TRPV1
ADRBK2
GPBAR1
TRPV3
GAPDHS
CSNK2A1
IGLC1
HOXA10
NR1I2
ADAM28
ABL1
NR1I3
ABL2
